# Supplementary material
Source: HighWire-hosted journal article supplement (https://ard.bmj.com/content/77/2/300)
Supplement: inline-supplementary-material-3 [file inline-supplementary-material-3.xls]

## Sheet: Supp Table 2_RAvsOA in PB
Affy ID	Gene Title	Gene Symbol	Mean EG	Median EG	Standard Deviation EG	Present Call EG	Mean BG	Median BG	Standard Deviation BG	Present Call BG	SLR Diff Regulated EG vs BG	FC Diff Regulated EG vs BG	Change Increased	Change Decreased	T-Test Signal	T-Test EG vs BG	T-Test EG vs EG	T-Test BG vs BG	No Change EG vs BG	No Change EG vs EG	No Change BG vs BG	Chromosomal Location	Gene Ontology Biological Process	Gene Ontology Cellular Component	Gene Ontology Molecular Function	Pathway
229934_at	---	---	628.233	547	216.512	100	356.517	354.05	81.866	100	0.802778	1.74446	77.7778	0	0.0134838	7.29447e-10	5.407e-07	4.11821e-08	22.2222	40	60	---	---	---	---	---
236065_at	---	---	254.8	229.1	72.9133	100	154.467	139.8	31.892	100	0.772222	1.7079	77.7778	0	0.00941257	5.04053e-09	4.51689e-06	7.62268e-08	22.2222	46.6667	46.6667	---	---	---	---	---
1556314_a_at	---	---	126.3	102.35	63.6317	100	50.1	37.9	35.4053	83.3333	1.375	2.59368	72.2222	2.77778	0.0274242	1.87046e-06	6.69051e-06	0.000263776	25	40	33.3333	---	---	---	---	---
228006_at	---	---	1146.37	1101.5	156.008	100	816.067	804.55	162.015	100	0.55	1.46409	72.2222	0	0.0140938	1.02771e-09	2.25296e-09	5.1517e-06	27.7778	80	40	---	0000079 // regulation of cyclin-dependent protein kinase activity // traceable author statement /// 0001525 // angiogenesis // inferred from electronic annotation /// 0001933 // negative regulation of protein phosphorylation // inferred from direct assay	0005634 // nucleus // inferred from electronic annotation /// 0005634 // nucleus // inferred from direct assay /// 0005737 // cytoplasm // inferred from electronic annotation /// 0005737 // cytoplasm // inferred from direct assay /// 0005737 // cytoplasm	0000287 // magnesium ion binding // inferred from electronic annotation /// 0004437 // inositol or phosphatidylinositol phosphatase activity // inferred from electronic annotation /// 0004438 // phosphatidylinositol-3-phosphatase activity // inferred from	---
243813_at	---	---	244.05	235.1	33.0862	100	171.517	163.75	31.5741	100	0.497222	1.41149	72.2222	0	0.00435588	2.28806e-14	3.43448e-13	6.24859e-09	27.7778	100	66.6667	---	---	---	---	---
1558795_at	---	---	150.333	109.15	109.655	100	80.5667	48.4	64.2687	100	1.12222	2.17682	69.4444	16.6667	0.121111	0.000449274	0.00100893	0.00733767	13.8889	33.3333	33.3333	---	---	---	---	---
1558796_a_at	---	---	112.4	77.8	86.4341	66.6667	61.5	30.25	61.761	16.6667	1.61944	3.07257	63.8889	13.8889	0.164806	0.000523986	0.000284354	0.0107642	22.2222	33.3333	60	---	---	---	---	---
231513_at	---	---	136.633	97.95	106.829	100	48.35	46.3	22.5612	83.3333	1.46667	2.76383	63.8889	0	0.0451104	4.85827e-06	0.000101526	0.000151415	36.1111	26.6667	53.3333	---	---	---	---	---
236345_at	---	---	300.65	308.15	145.616	100	160.217	146.65	49.3047	100	0.588889	1.50409	63.8889	0	0.0954184	1.32737e-05	0.00111573	2.83469e-05	36.1111	33.3333	60	---	---	---	---	---
236488_s_at	---	---	1438.55	1301.85	397.082	100	883.167	879.1	377.406	100	0.663889	1.58435	63.8889	0	0.0514049	5.77331e-08	7.25808e-07	3.47247e-05	36.1111	60	40	---	---	---	---	---
228854_at	---	---	1247.92	296.45	1625.48	100	159.1	138.45	87.2676	100	1.83611	3.57046	61.1111	11.1111	0.0806432	0.000191783	0.00727794	0.000126163	27.7778	20	13.3333	---	---	---	---	---
234574_at	---	---	204.283	208.7	49.3574	100	383.35	417.55	245.681	100	-0.494444	-1.40878	27.7778	63.8889	0.455871	0.0898662	0.050371	0.246661	8.33333	66.6667	13.3333	---	---	---	---	---
240156_at	---	---	95.8167	87.25	60.8303	100	188.633	158.3	148.462	100	-0.933333	-1.90968	19.4444	61.1111	0.356784	0.032945	0.0416827	0.107681	19.4444	40	13.3333	---	---	---	---	---
1569263_at	---	---	76.9167	73.55	35.6752	83.3333	219.917	213.95	128.447	83.3333	-1.12778	-2.18522	13.8889	77.7778	0.161796	0.00695743	0.0064071	0.0490573	8.33333	33.3333	20	---	---	---	---	---
238909_at	---	---	476.4	419.75	216.212	100	878.817	733.9	548.299	100	-0.705556	-1.63077	13.8889	63.8889	0.198007	0.00388503	0.00461745	0.0318328	22.2222	20	13.3333	---	---	---	---	---
241924_at	---	---	80.1833	59.05	50.9282	100	133.65	115.6	77.5377	100	-0.594444	-1.50989	13.8889	66.6667	0.298668	0.0259702	0.0304723	0.100152	19.4444	53.3333	20	---	---	---	---	---
230233_at	---	---	151.083	75.45	168.887	100	371.5	238.2	295.712	100	-1.34722	-2.54422	11.1111	72.2222	0.0703848	0.000153649	0.00140222	0.0016213	16.6667	60	13.3333	---	---	---	---	---
1556747_a_at	---	---	164.367	154.2	42.7943	100	275.233	292.65	79.562	100	-0.658333	-1.57826	8.33333	61.1111	0.0222811	5.23974e-05	0.000306018	0.00123956	30.5556	53.3333	40	---	---	---	---	---
1556346_at	---	---	463.05	419.25	148.143	100	900.083	915.95	321.481	100	-0.991667	-1.98848	5.55556	72.2222	0.0254999	2.23649e-08	5.33771e-08	1.72245e-05	22.2222	60	46.6667	---	---	---	---	---
1560800_at	---	---	16.3	11	19.6255	16.6667	80.35	68.85	72.7239	66.6667	-1.93889	-3.8341	5.55556	63.8889	0.283549	0.0261763	0.043318	0.0741111	30.5556	86.6667	13.3333	---	---	---	---	---
241773_at	---	---	110.183	80.55	65.0381	100	171.967	194.15	60.0416	100	-0.675	-1.5966	5.55556	63.8889	0.219633	0.00235004	0.00846338	0.0141036	30.5556	53.3333	66.6667	---	---	---	---	---
244482_at	---	---	8.2	0.9	15.8915	16.6667	98.8833	103.55	77.6552	66.6667	-3.91389	-15.0729	5.55556	66.6667	0.0311238	4.39501e-06	2.56495e-05	0.00031022	27.7778	66.6667	26.6667	---	---	---	---	---
43511_s_at	---	---	432.133	385.1	111.059	100	600.483	614.2	51.7948	100	-0.441667	-1.35817	5.55556	72.2222	0.0155092	1.03363e-07	0.000115608	5.29688e-08	22.2222	40	86.6667	---	---	---	---	---
1560738_at	---	---	25.1833	21.55	8.78472	66.6667	49.6667	50.05	12.4791	100	-0.986111	-1.98084	0	61.1111	0.00530208	6.13716e-11	8.35743e-08	1.47525e-09	38.8889	80	73.3333	---	---	---	---	---
1560739_a_at	---	---	44.25	41.9	16.2532	100	97.8167	97.7	33.4007	100	-1.17222	-2.25359	0	69.4444	0.00516124	5.0986e-15	4.44198e-13	3.20953e-10	30.5556	100	46.6667	---	---	---	---	---
227749_at	---	---	356.1	365.9	69.7216	100	517.717	515.55	83.4646	100	-0.530556	-1.44449	0	63.8889	0.0104211	1.09322e-09	1.77484e-06	3.39511e-08	36.1111	80	86.6667	---	---	---	---	---
235761_at	---	---	30.2667	35.3	14.4062	66.6667	55.5333	58.75	12.4106	100	-1.36111	-2.56883	0	61.1111	0.0558452	7.10011e-08	0.000328149	2.1467e-09	38.8889	86.6667	100	---	---	---	---	---
49111_at	---	---	266.983	255.4	47.4769	100	377.9	375.9	34.2815	100	-0.427778	-1.34516	0	77.7778	0.00374171	1.97979e-10	3.31469e-06	2.31423e-10	22.2222	66.6667	93.3333	---	---	---	---	---
203504_s_at	ATP-binding cassette, sub-family A (ABC1), member 1	ABCA1	292.967	314.55	124.405	100	172.85	188.4	52.1844	100	0.652778	1.57219	80.5556	13.8889	0.248725	0.00816264	0.0492517	0.0104831	5.55556	40	60	chr9q31.1	0002790 // peptide secretion // inferred from electronic annotation /// 0006497 // protein lipidation // inferred from electronic annotation /// 0006629 // lipid metabolic process // inferred from electronic annotation /// 0006810 // transport // inferred	0005624 // membrane fraction // inferred from direct assay /// 0005794 // Golgi apparatus // inferred from electronic annotation /// 0005886 // plasma membrane // not recorded /// 0005886 // plasma membrane // inferred from electronic annotation /// 00058	0000166 // nucleotide binding // inferred from electronic annotation /// 0005515 // protein binding // inferred from physical interaction /// 0005515 // protein binding // inferred from electronic annotation /// 0005524 // ATP binding // inferred from dir	Statin_Pathway_PharmGKB // GenMAPP
203505_at	ATP-binding cassette, sub-family A (ABC1), member 1	ABCA1	473.417	493.6	191.162	100	361.067	396.4	112.599	100	0.702778	1.62764	69.4444	13.8889	0.506652	0.00459413	0.040583	0.00432255	16.6667	40	60	chr9q31.1	0002790 // peptide secretion // inferred from electronic annotation /// 0006497 // protein lipidation // inferred from electronic annotation /// 0006629 // lipid metabolic process // inferred from electronic annotation /// 0006810 // transport // inferred	0005624 // membrane fraction // inferred from direct assay /// 0005794 // Golgi apparatus // inferred from electronic annotation /// 0005886 // plasma membrane // not recorded /// 0005886 // plasma membrane // inferred from electronic annotation /// 00058	0000166 // nucleotide binding // inferred from electronic annotation /// 0005515 // protein binding // inferred from physical interaction /// 0005515 // protein binding // inferred from electronic annotation /// 0005524 // ATP binding // inferred from dir	Statin_Pathway_PharmGKB // GenMAPP
207275_s_at	acyl-CoA synthetase long-chain family member 1	ACSL1	1423.92	1317.05	492.634	100	741.517	727.65	147.373	100	0.833333	1.7818	80.5556	0	0.00958451	1.57776e-09	9.24733e-06	1.06273e-09	19.4444	20	60	chr4q35	0006629 // lipid metabolic process // inferred from electronic annotation /// 0006631 // fatty acid metabolic process // inferred from electronic annotation /// 0006641 // triglyceride metabolic process // inferred from electronic annotation /// 0007584 /	0005625 // soluble fraction // inferred from electronic annotation /// 0005739 // mitochondrion // inferred from electronic annotation /// 0005741 // mitochondrial outer membrane // inferred from electronic annotation /// 0005777 // peroxisome // inferred	0000166 // nucleotide binding // inferred from electronic annotation /// 0003824 // catalytic activity // inferred from electronic annotation /// 0004467 // long-chain fatty acid-CoA ligase activity // not recorded /// 0004467 // long-chain fatty acid-CoA	Fatty_Acid_Degradation // GenMAPP /// Mitochondrial_fatty_acid_betaoxidation // GenMAPP
201963_at	acyl-CoA synthetase long-chain family member 1	ACSL1	3998.72	3652.75	863.2	100	2367.5	2446.4	391.936	100	0.666667	1.5874	77.7778	0	0.00153697	3.1848e-11	5.14889e-07	1.57248e-10	22.2222	46.6667	66.6667	chr4q35	0006629 // lipid metabolic process // inferred from electronic annotation /// 0006631 // fatty acid metabolic process // inferred from electronic annotation /// 0006641 // triglyceride metabolic process // inferred from electronic annotation /// 0007584 /	0005625 // soluble fraction // inferred from electronic annotation /// 0005739 // mitochondrion // inferred from electronic annotation /// 0005741 // mitochondrial outer membrane // inferred from electronic annotation /// 0005777 // peroxisome // inferred	0000166 // nucleotide binding // inferred from electronic annotation /// 0003824 // catalytic activity // inferred from electronic annotation /// 0004467 // long-chain fatty acid-CoA ligase activity // not recorded /// 0004467 // long-chain fatty acid-CoA	Fatty_Acid_Degradation // GenMAPP /// Mitochondrial_fatty_acid_betaoxidation // GenMAPP
201661_s_at	acyl-CoA synthetase long-chain family member 3	ACSL3	591.7	572.8	123.42	100	400.667	397.3	76.0075	100	0.563889	1.47825	72.2222	0	0.0128455	2.71822e-09	1.42748e-07	1.23298e-06	27.7778	80	66.6667	chr2q34-q35	0006629 // lipid metabolic process // inferred from electronic annotation /// 0006631 // fatty acid metabolic process // inferred from electronic annotation /// 0006633 // fatty acid biosynthetic process // inferred from electronic annotation /// 0007420	0005739 // mitochondrion // inferred from electronic annotation /// 0005741 // mitochondrial outer membrane // inferred from electronic annotation /// 0005777 // peroxisome // inferred from electronic annotation /// 0005778 // peroxisomal membrane // infe	0000166 // nucleotide binding // inferred from electronic annotation /// 0003824 // catalytic activity // inferred from electronic annotation /// 0004321 // fatty-acyl-CoA synthase activity // traceable author statement /// 0004467 // long-chain fatty aci	Fatty_Acid_Degradation // GenMAPP /// Mitochondrial_fatty_acid_betaoxidation // GenMAPP
201660_at	acyl-CoA synthetase long-chain family member 3	ACSL3	264.05	259.45	20.1631	100	179.583	176.95	34.0156	100	0.597222	1.5128	63.8889	0	0.00388156	6.2551e-12	2.01378e-11	9.15442e-08	36.1111	86.6667	73.3333	chr2q34-q35	0006629 // lipid metabolic process // inferred from electronic annotation /// 0006631 // fatty acid metabolic process // inferred from electronic annotation /// 0006633 // fatty acid biosynthetic process // inferred from electronic annotation /// 0007420	0005739 // mitochondrion // inferred from electronic annotation /// 0005741 // mitochondrial outer membrane // inferred from electronic annotation /// 0005777 // peroxisome // inferred from electronic annotation /// 0005778 // peroxisomal membrane // infe	0000166 // nucleotide binding // inferred from electronic annotation /// 0003824 // catalytic activity // inferred from electronic annotation /// 0004321 // fatty-acyl-CoA synthase activity // traceable author statement /// 0004467 // long-chain fatty aci	Fatty_Acid_Degradation // GenMAPP /// Mitochondrial_fatty_acid_betaoxidation // GenMAPP
228603_at	ARP3 actin-related protein 3 homolog (yeast)	ACTR3	715.383	741.75	93.6968	100	958.567	992.55	231.101	100	-0.402778	-1.32205	11.1111	61.1111	0.0954581	4.46612e-05	6.34026e-05	0.00294549	27.7778	73.3333	46.6667	chr2q14.1	0006928 // cellular component movement // traceable author statement /// 0009743 // response to carbohydrate stimulus // inferred from electronic annotation /// 0010592 // positive regulation of lamellipodium assembly // inferred from electronic annotatio	0000139 // Golgi membrane // inferred from electronic annotation /// 0002102 // podosome // inferred from electronic annotation /// 0005737 // cytoplasm // inferred from electronic annotation /// 0005856 // cytoskeleton // inferred from electronic annotat	0000166 // nucleotide binding // inferred from electronic annotation /// 0003779 // actin binding // inferred from electronic annotation /// 0005515 // protein binding // inferred from physical interaction /// 0005515 // protein binding // inferred from e	---
213198_at	activin A receptor, type IB	ACVR1B	677.383	650.15	133.596	100	483.283	474.75	22.152	100	0.533333	1.44727	75	0	0.0114809	1.40573e-11	8.37716e-07	2.25688e-11	25	66.6667	86.6667	chr12q13	0000082 // G1/S transition of mitotic cell cycle // inferred from direct assay /// 0001701 // in utero embryonic development // inferred from electronic annotation /// 0001942 // hair follicle development // inferred from electronic annotation /// 0006468	0005887 // integral to plasma membrane // inferred from direct assay /// 0009986 // cell surface // inferred from direct assay /// 0016020 // membrane // inferred from electronic annotation /// 0016021 // integral to membrane // inferred from electronic a	0000166 // nucleotide binding // inferred from electronic annotation /// 0004672 // protein kinase activity // inferred from electronic annotation /// 0004674 // protein serine/threonine kinase activity // inferred from direct assay /// 0004674 // protein	---
204120_s_at	adenosine kinase	ADK	132.183	89.6	104.914	100	213.9	215.4	112.054	100	-0.686111	-1.60894	13.8889	61.1111	0.388131	0.0196817	0.0367225	0.0669905	25	40	20	chr10q22|10q11-q24	0006166 // purine ribonucleoside salvage // inferred from electronic annotation /// 0006175 // dATP biosynthetic process // inferred from electronic annotation /// 0009156 // ribonucleoside monophosphate biosynthetic process // traceable author statement	0005634 // nucleus // inferred from electronic annotation /// 0005829 // cytosol // inferred from electronic annotation	0000166 // nucleotide binding // inferred from electronic annotation /// 0004001 // adenosine kinase activity // inferred from electronic annotation /// 0004001 // adenosine kinase activity // traceable author statement /// 0005524 // ATP binding // infer	---
204119_s_at	adenosine kinase	ADK	370.883	310.5	186.589	100	655.517	750.45	219.6	100	-0.836111	-1.78523	5.55556	61.1111	0.0387467	1.09237e-05	0.000231438	0.000235448	33.3333	46.6667	33.3333	chr10q22|10q11-q24	0006166 // purine ribonucleoside salvage // inferred from electronic annotation /// 0006175 // dATP biosynthetic process // inferred from electronic annotation /// 0009156 // ribonucleoside monophosphate biosynthetic process // traceable author statement	0005634 // nucleus // inferred from electronic annotation /// 0005829 // cytosol // inferred from electronic annotation	0000166 // nucleotide binding // inferred from electronic annotation /// 0004001 // adenosine kinase activity // inferred from electronic annotation /// 0004001 // adenosine kinase activity // traceable author statement /// 0005524 // ATP binding // infer	---
202912_at	adrenomedullin	ADM	1873.28	1154.1	1976.37	100	658.133	539	264.062	100	0.841667	1.79212	66.6667	16.6667	0.150431	0.00417098	0.047687	0.00130567	16.6667	6.66667	40	chr11p15.4	0001666 // response to hypoxia // inferred from electronic annotation /// 0001843 // neural tube closure // inferred from electronic annotation /// 0006171 // cAMP biosynthetic process // traceable author statement /// 0006701 // progesterone biosynthetic	0005576 // extracellular region // not recorded /// 0005576 // extracellular region // inferred from electronic annotation /// 0005615 // extracellular space // inferred from direct assay /// 0005615 // extracellular space // inferred from electronic anno	0005102 // receptor binding // traceable author statement /// 0005179 // hormone activity // inferred from electronic annotation	Smooth_muscle_contraction // GenMAPP
218092_s_at	ArfGAP with FG repeats 1	AGFG1	1471.03	1456.4	280.669	100	880.383	751.5	203.107	100	0.713889	1.64022	75	0	0.00267329	8.84121e-12	2.31741e-08	1.1357e-09	25	53.3333	46.6667	chr2q36.3	0001675 // acrosome assembly // inferred from electronic annotation /// 0006406 // mRNA export from nucleus // traceable author statement /// 0006810 // transport // inferred from electronic annotation /// 0007275 // multicellular organismal development /	0005634 // nucleus // inferred from electronic annotation /// 0005643 // nuclear pore // traceable author statement /// 0005794 // Golgi apparatus // inferred from direct assay /// 0016023 // cytoplasmic membrane-bounded vesicle // inferred from electroni	0003677 // DNA binding // inferred from electronic annotation /// 0003723 // RNA binding // traceable author statement /// 0005515 // protein binding // inferred from physical interaction /// 0008060 // ARF GTPase activator activity // inferred from elect	---
218091_at	ArfGAP with FG repeats 1	AGFG1	1242.38	1140.45	388.8	100	830.167	832.8	86.4846	100	0.541667	1.45565	61.1111	0	0.0458825	2.38255e-06	0.000767586	7.02e-07	38.8889	33.3333	73.3333	chr2q36.3	0001675 // acrosome assembly // inferred from electronic annotation /// 0006406 // mRNA export from nucleus // traceable author statement /// 0006810 // transport // inferred from electronic annotation /// 0007275 // multicellular organismal development /	0005634 // nucleus // inferred from electronic annotation /// 0005643 // nuclear pore // traceable author statement /// 0005794 // Golgi apparatus // inferred from direct assay /// 0016023 // cytoplasmic membrane-bounded vesicle // inferred from electroni	0003677 // DNA binding // inferred from electronic annotation /// 0003723 // RNA binding // traceable author statement /// 0005515 // protein binding // inferred from physical interaction /// 0008060 // ARF GTPase activator activity // inferred from elect	---
213396_s_at	A kinase (PRKA) anchor protein 10	AKAP10	272.983	264.45	50.6272	100	437.333	449.85	151.159	100	-0.558333	-1.47257	2.77778	69.4444	0.0558984	3.63288e-06	2.85297e-06	0.000674074	27.7778	60	33.3333	chr17p11.1	0007165 // signal transduction // traceable author statement /// 0008104 // protein localization // inferred from electronic annotation /// 0008104 // protein localization // traceable author statement	0005737 // cytoplasm // inferred from electronic annotation /// 0005739 // mitochondrion // inferred from electronic annotation /// 0016020 // membrane // inferred from electronic annotation	0004871 // signal transducer activity // inferred from electronic annotation /// 0016301 // kinase activity // inferred from electronic annotation	G_Protein_Signaling // GenMAPP
204174_at	arachidonate 5-lipoxygenase-activating protein	ALOX5AP	2645.95	2783.95	820.575	100	1518.35	1561.4	338.423	100	0.822222	1.76813	80.5556	8.33333	0.0282622	1.62189e-07	7.71844e-05	3.82241e-07	11.1111	26.6667	46.6667	chr13q12	0002540 // leukotriene production involved in inflammatory response // inferred from electronic annotation /// 0006691 // leukotriene metabolic process // inferred from electronic annotation /// 0019370 // leukotriene biosynthetic process // inferred from	0005634 // nucleus // inferred from electronic annotation /// 0005635 // nuclear envelope // inferred from direct assay /// 0005635 // nuclear envelope // inferred from electronic annotation /// 0005783 // endoplasmic reticulum // inferred from direct ass	0004051 // arachidonate 5-lipoxygenase activity // inferred from electronic annotation /// 0005515 // protein binding // inferred from physical interaction /// 0005515 // protein binding // inferred from electronic annotation /// 0008047 // enzyme activat	Eicosanoid_Synthesis // GenMAPP
238439_at	ankyrin repeat domain 22	ANKRD22	495.717	289.45	423.452	100	127.35	107.45	56.9534	100	1.42222	2.67998	69.4444	5.55556	0.0654386	3.32663e-05	0.00263735	1.48929e-05	25	13.3333	40	chr10q23.31	---	---	---	---
205568_at	aquaporin 9	AQP9	1737.72	1544.8	579.33	100	950.217	940.5	139.744	100	0.597222	1.5128	77.7778	0	0.00461621	2.17803e-10	2.87835e-06	8.76772e-11	22.2222	46.6667	80	chr15q	0006810 // transport // traceable author statement /// 0006810 // transport // inferred from electronic annotation /// 0006833 // water transport // inferred from direct assay /// 0006833 // water transport // inferred from electronic annotation /// 00068	0005792 // microsome // inferred from electronic annotation /// 0005887 // integral to plasma membrane // traceable author statement /// 0016020 // membrane // inferred from electronic annotation /// 0016021 // integral to membrane // non-traceable author	0005215 // transporter activity // inferred from electronic annotation /// 0005275 // amine transmembrane transporter activity // traceable author statement /// 0005345 // purine transmembrane transporter activity // inferred from direct assay /// 0005350	---
203910_at	Rho GTPase activating protein 29	ARHGAP29	200.217	168.8	152.791	100	57.5667	66.15	21.3008	100	1.51667	2.86129	75	0	0.0118326	1.50076e-08	3.00227e-05	2.52642e-08	25	26.6667	66.6667	chr1p22.1	0007165 // signal transduction // inferred from electronic annotation /// 0007266 // Rho protein signal transduction // traceable author statement	0005622 // intracellular // inferred from electronic annotation	0005096 // GTPase activator activity // inferred from electronic annotation /// 0005100 // Rho GTPase activator activity // traceable author statement /// 0046872 // metal ion binding // inferred from electronic annotation	---
202207_at	ADP-ribosylation factor-like 4C	ARL4C	254.4	250.7	86.8329	100	580.283	521.55	264.223	100	-1.18611	-2.27539	8.33333	75	0.0217726	1.97005e-07	5.4914e-06	2.66184e-05	16.6667	13.3333	13.3333	chr2q37.1	0006810 // transport // inferred from electronic annotation /// 0007264 // small GTPase mediated signal transduction // inferred from electronic annotation	0005622 // intracellular // inferred from electronic annotation /// 0005634 // nucleus // traceable author statement /// 0030175 // filopodium // inferred from electronic annotation /// 0042995 // cell projection // inferred from electronic annotation	0000166 // nucleotide binding // inferred from electronic annotation /// 0003924 // GTPase activity // traceable author statement /// 0005525 // GTP binding // inferred from electronic annotation	---
202206_at	ADP-ribosylation factor-like 4C	ARL4C	221.283	217.4	79.0248	100	397.767	385	143.647	100	-0.988889	-1.98466	2.77778	63.8889	0.0499551	6.05054e-08	1.10797e-07	4.77381e-05	33.3333	46.6667	33.3333	chr2q37.1	0006810 // transport // inferred from electronic annotation /// 0007264 // small GTPase mediated signal transduction // inferred from electronic annotation	0005622 // intracellular // inferred from electronic annotation /// 0005634 // nucleus // traceable author statement /// 0030175 // filopodium // inferred from electronic annotation /// 0042995 // cell projection // inferred from electronic annotation	0000166 // nucleotide binding // inferred from electronic annotation /// 0003924 // GTPase activity // traceable author statement /// 0005525 // GTP binding // inferred from electronic annotation	---
202208_s_at	ADP-ribosylation factor-like 4C	ARL4C	103.15	90.85	31.6631	33.3333	225.367	226.35	95.3056	83.3333	-1.08333	-2.11893	2.77778	61.1111	0.0219392	5.70411e-09	4.24349e-08	1.3599e-05	36.1111	86.6667	33.3333	chr2q37.1	0006810 // transport // inferred from electronic annotation /// 0007264 // small GTPase mediated signal transduction // inferred from electronic annotation	0005622 // intracellular // inferred from electronic annotation /// 0005634 // nucleus // traceable author statement /// 0030175 // filopodium // inferred from electronic annotation /// 0042995 // cell projection // inferred from electronic annotation	0000166 // nucleotide binding // inferred from electronic annotation /// 0003924 // GTPase activity // traceable author statement /// 0005525 // GTP binding // inferred from electronic annotation	---
201243_s_at	ATPase, Na+/K+ transporting, beta 1 polypeptide	ATP1B1	64.6667	53.7	26.1064	83.3333	173.167	170.75	78.223	83.3333	-1.41111	-2.65942	5.55556	72.2222	0.021333	2.50125e-07	3.90864e-06	2.82563e-05	22.2222	46.6667	26.6667	chr1q24	0001666 // response to hypoxia // inferred from electronic annotation /// 0006754 // ATP biosynthetic process // inferred from electronic annotation /// 0006810 // transport // traceable author statement /// 0006810 // transport // inferred from electroni	0005886 // plasma membrane // not recorded /// 0005886 // plasma membrane // inferred from electronic annotation /// 0005890 // sodium:potassium-exchanging ATPase complex // inferred from electronic annotation /// 0005890 // sodium:potassium-exchanging AT	0005391 // sodium:potassium-exchanging ATPase activity // inferred from electronic annotation /// 0005391 // sodium:potassium-exchanging ATPase activity // traceable author statement /// 0005515 // protein binding // inferred from physical interaction ///	Calcium_regulation_in_cardiac_cells // GenMAPP
201242_s_at	ATPase, Na+/K+ transporting, beta 1 polypeptide	ATP1B1	57.5833	47.35	29.1526	100	183.15	185.65	81.6592	100	-1.55556	-2.93947	2.77778	80.5556	0.00653415	9.5821e-10	1.1896e-07	4.59966e-07	16.6667	46.6667	13.3333	chr1q24	0001666 // response to hypoxia // inferred from electronic annotation /// 0006754 // ATP biosynthetic process // inferred from electronic annotation /// 0006810 // transport // traceable author statement /// 0006810 // transport // inferred from electroni	0005886 // plasma membrane // not recorded /// 0005886 // plasma membrane // inferred from electronic annotation /// 0005890 // sodium:potassium-exchanging ATPase complex // inferred from electronic annotation /// 0005890 // sodium:potassium-exchanging AT	0005391 // sodium:potassium-exchanging ATPase activity // inferred from electronic annotation /// 0005391 // sodium:potassium-exchanging ATPase activity // traceable author statement /// 0005515 // protein binding // inferred from physical interaction ///	Calcium_regulation_in_cardiac_cells // GenMAPP
209281_s_at	ATPase, Ca++ transporting, plasma membrane 1	ATP2B1	1044.92	1139.3	295.556	100	1496.78	1444.85	366.964	100	-0.502778	-1.41694	0	61.1111	0.0796576	3.26586e-05	0.00174388	4.97366e-05	38.8889	40	53.3333	chr12q21.3	0006754 // ATP biosynthetic process // inferred from electronic annotation /// 0006810 // transport // traceable author statement /// 0006810 // transport // inferred from electronic annotation /// 0006811 // ion transport // inferred from electronic anno	0005886 // plasma membrane // inferred from electronic annotation /// 0005887 // integral to plasma membrane // traceable author statement /// 0016020 // membrane // inferred from electronic annotation /// 0016021 // integral to membrane // inferred from	0000166 // nucleotide binding // inferred from electronic annotation /// 0003824 // catalytic activity // inferred from electronic annotation /// 0005388 // calcium-transporting ATPase activity // inferred from electronic annotation /// 0005388 // calcium	Calcium_regulation_in_cardiac_cells // GenMAPP
202874_s_at	ATPase, H+ transporting, lysosomal 42kDa, V1 subunit C1	ATP6V1C1	464.65	481.8	41.9174	100	330.717	336.15	61.4884	100	0.491667	1.40607	69.4444	2.77778	0.00693626	5.46108e-12	3.18727e-12	7.31145e-07	27.7778	66.6667	33.3333	chr8q22.3	0006810 // transport // inferred from electronic annotation /// 0006811 // ion transport // inferred from electronic annotation /// 0015986 // ATP synthesis coupled proton transport // inferred from electronic annotation /// 0015992 // proton transport //	0005737 // cytoplasm // inferred from electronic annotation /// 0005886 // plasma membrane // inferred from sequence or structural similarity /// 0016469 // proton-transporting two-sector ATPase complex // traceable author statement /// 0031410 // cytopla	0005215 // transporter activity // non-traceable author statement /// 0005515 // protein binding // inferred from physical interaction /// 0008553 // hydrogen-exporting ATPase activity, phosphorylative mechanism // inferred from electronic annotation ///	---
222498_at	5-azacytidine induced 2	AZI2	904.017	883	82.4136	100	630.417	677.3	113.468	100	0.516667	1.43065	69.4444	0	0.00567026	9.55597e-14	6.02988e-11	2.53311e-10	30.5556	93.3333	60	chr3p24.1	0007249 // I-kappaB kinase/NF-kappaB cascade // inferred from electronic annotation	0005737 // cytoplasm // inferred from electronic annotation	---	---
228189_at	BCL2-associated athanogene 4	BAG4	663.433	617.35	188.108	100	466.933	399.95	165.945	100	0.516667	1.43065	61.1111	13.8889	0.0979081	0.000699242	0.00190692	0.00862587	25	26.6667	33.3333	chr8p11.23	0006457 // protein folding // traceable author statement /// 0006915 // apoptosis // inferred from electronic annotation /// 0006916 // anti-apoptosis // traceable author statement	0005737 // cytoplasm // inferred from electronic annotation	0005057 // receptor signaling protein activity // traceable author statement /// 0005515 // protein binding // inferred from electronic annotation	---
226517_at	branched chain amino-acid transaminase 1, cytosolic	BCAT1	557.9	545.15	240.248	100	335.283	323.85	143.779	100	0.713889	1.64022	69.4444	13.8889	0.114873	0.000454667	0.00272776	0.00400977	16.6667	26.6667	40	chr12p12.1	0000082 // G1/S transition of mitotic cell cycle // traceable author statement /// 0008152 // metabolic process // inferred from electronic annotation /// 0008283 // cell proliferation // traceable author statement /// 0008652 // cellular amino acid biosy	0005737 // cytoplasm // inferred from electronic annotation /// 0005739 // mitochondrion // inferred from electronic annotation /// 0005829 // cytosol // not recorded /// 0005829 // cytosol // inferred from electronic annotation	0003824 // catalytic activity // inferred from electronic annotation /// 0004084 // branched-chain-amino-acid transaminase activity // not recorded /// 0004084 // branched-chain-amino-acid transaminase activity // inferred from electronic annotation /// 0	---
225285_at	branched chain amino-acid transaminase 1, cytosolic	BCAT1	669	677.2	236.465	100	420.25	375.4	178.609	100	0.727778	1.65609	63.8889	8.33333	0.102987	0.000254472	0.00109833	0.00387059	27.7778	26.6667	33.3333	chr12p12.1	0000082 // G1/S transition of mitotic cell cycle // traceable author statement /// 0008152 // metabolic process // inferred from electronic annotation /// 0008283 // cell proliferation // traceable author statement /// 0008652 // cellular amino acid biosy	0005737 // cytoplasm // inferred from electronic annotation /// 0005739 // mitochondrion // inferred from electronic annotation /// 0005829 // cytosol // not recorded /// 0005829 // cytosol // inferred from electronic annotation	0003824 // catalytic activity // inferred from electronic annotation /// 0004084 // branched-chain-amino-acid transaminase activity // not recorded /// 0004084 // branched-chain-amino-acid transaminase activity // inferred from electronic annotation /// 0	---
222891_s_at	B-cell CLL/lymphoma 11A (zinc finger protein)	BCL11A	379.783	333.95	158.764	100	523.667	518.7	102.161	100	-0.563889	-1.47825	8.33333	61.1111	0.105687	0.000139647	0.00790083	3.21041e-05	30.5556	20	80	chr2p16.1	0006350 // transcription // inferred from electronic annotation /// 0016925 // protein sumoylation // inferred from sequence or structural similarity /// 0030097 // hemopoiesis // non-traceable author statement /// 0045449 // regulation of transcription /	0005622 // intracellular // inferred from electronic annotation /// 0005634 // nucleus // non-traceable author statement /// 0005634 // nucleus // inferred from electronic annotation /// 0005737 // cytoplasm // non-traceable author statement /// 0005737 /	0003676 // nucleic acid binding // inferred from electronic annotation /// 0008270 // zinc ion binding // inferred from electronic annotation /// 0046872 // metal ion binding // inferred from electronic annotation	---
204908_s_at	B-cell CLL/lymphoma 3	BCL3	285.8	261.15	81.6948	100	443.817	376.4	136.976	100	-0.547222	-1.46127	8.33333	61.1111	0.0316246	9.25155e-06	0.000227969	0.000172953	30.5556	46.6667	46.6667	chr19q13.1-q13.2	0000060 // protein import into nucleus, translocation // inferred from mutant phenotype /// 0002268 // follicular dendritic cell differentiation // inferred from electronic annotation /// 0002315 // marginal zone B cell differentiation // inferred from el	0005634 // nucleus // inferred from direct assay /// 0005634 // nucleus // inferred from electronic annotation /// 0005737 // cytoplasm // inferred from direct assay /// 0005737 // cytoplasm // inferred from electronic annotation /// 0032996 // Bcl3-Bcl10	0003677 // DNA binding // inferred from electronic annotation /// 0003700 // sequence-specific DNA binding transcription factor activity // inferred from electronic annotation /// 0005515 // protein binding // inferred from physical interaction /// 000551	---
201170_s_at	basic helix-loop-helix family, member e40	BHLHE40	670.967	629.35	274.494	100	1332.92	1123.75	694.956	100	-0.958333	-1.94306	5.55556	66.6667	0.0336002	3.53583e-06	0.000145884	6.94257e-05	27.7778	20	40	chr3p26	0006350 // transcription // inferred from electronic annotation /// 0006355 // regulation of transcription, DNA-dependent // non-traceable author statement /// 0006355 // regulation of transcription, DNA-dependent // inferred from electronic annotation //	0005634 // nucleus // non-traceable author statement /// 0005634 // nucleus // inferred from electronic annotation	0003677 // DNA binding // inferred from electronic annotation /// 0003700 // sequence-specific DNA binding transcription factor activity // non-traceable author statement /// 0005515 // protein binding // inferred from physical interaction /// 0016564 //	---
201236_s_at	BTG family, member 2	BTG2	614.083	607.55	65.2903	100	1077.88	1155	400.191	100	-0.752778	-1.68503	0	66.6667	0.0480564	1.22283e-05	1.7513e-06	0.00211085	33.3333	86.6667	13.3333	chr1q32	0006281 // DNA repair // traceable author statement /// 0006350 // transcription // inferred from electronic annotation /// 0006479 // protein methylation // inferred from electronic annotation /// 0006974 // response to DNA damage stimulus // inferred fr	---	0005515 // protein binding // inferred from physical interaction /// 0005515 // protein binding // inferred from electronic annotation	---
218723_s_at	chromosome 13 open reading frame 15	C13orf15	103.167	100.95	48.3917	100	421.3	364.75	244.006	100	-2.03333	-4.0935	0	94.4444	0.00189566	2.08572e-12	4.51642e-10	1.40436e-08	5.55556	40	13.3333	chr13q14.11	0000079 // regulation of cyclin-dependent protein kinase activity // traceable author statement /// 0007049 // cell cycle // inferred from electronic annotation	0005634 // nucleus // inferred from electronic annotation /// 0005737 // cytoplasm // inferred from electronic annotation /// 0005737 // cytoplasm // traceable author statement /// 0005815 // microtubule organizing center // inferred from electronic annot	0005515 // protein binding // inferred from electronic annotation	---
229520_s_at	chromosome 14 open reading frame 118	C14orf118	230.85	192	126.098	100	327.067	330.8	157.251	100	-0.502778	-1.41694	19.4444	61.1111	0.375796	0.0255384	0.0409112	0.0849633	19.4444	60	26.6667	chr14q22.1-q24.3	---	---	---	---
204494_s_at	chromosome 15 open reading frame 39	C15orf39	253.15	268.55	58.24	100	413.95	401.8	103.944	100	-0.730556	-1.65928	0	63.8889	0.0132555	1.31523e-08	8.66919e-06	2.87683e-07	36.1111	60	46.6667	chr15q24.2	---	---	---	---
215087_at	chromosome 15 open reading frame 39	C15orf39	105.683	112.75	31.3676	100	208.983	192.5	81.5824	100	-0.961111	-1.94681	0	63.8889	0.0147462	7.99766e-07	3.23647e-05	2.6426e-05	36.1111	53.3333	26.6667	chr15q24.2	---	---	---	---
223351_at	chromosome 17 open reading frame 80	C17orf80	140.367	134.55	34.0613	100	86.0333	79.35	19.8178	83.3333	0.622222	1.53924	61.1111	0	0.0065255	2.51023e-08	3.84554e-06	4.61231e-07	38.8889	80	80	chr17q25.1	---	0016020 // membrane // inferred from electronic annotation /// 0016021 // integral to membrane // inferred from electronic annotation	---	---
235568_at	chromosome 19 open reading frame 59	C19orf59	2024.9	1890	733.39	100	1206.67	1250.3	256.477	100	0.730556	1.65928	75	0	0.0234839	1.09091e-07	6.78573e-05	2.64213e-07	25	33.3333	66.6667	chr19p13.2	---	0016020 // membrane // inferred from electronic annotation /// 0016021 // integral to membrane // inferred from electronic annotation	---	---
221823_at	chromosome 5 open reading frame 30	C5orf30	88.0833	79.65	28.9344	100	44.15	46.95	8.24192	100	0.744444	1.67533	61.1111	0	0.00599007	1.68606e-06	0.0010872	2.34004e-07	38.8889	40	100	chr5q21.1	---	---	---	---
213872_at	Chromosome 6 open reading frame 62	C6orf62	970.767	915.25	331.765	100	636.617	515.05	236.05	100	0.613889	1.53038	63.8889	8.33333	0.0818792	0.000142692	0.000796856	0.0023383	27.7778	20	46.6667	chr6p22.3	---	0005622 // intracellular // inferred from direct assay	---	---
235626_at	calcium/calmodulin-dependent protein kinase ID	CAMK1D	283.167	292.7	51.1496	100	377.817	377.8	34.878	100	-0.533333	-1.44727	0	66.6667	0.0200242	6.79698e-13	2.45557e-08	1.25474e-12	33.3333	73.3333	80	chr10p13	0006468 // protein phosphorylation // inferred from electronic annotation /// 0042981 // regulation of apoptosis // inferred from electronic annotation	0005634 // nucleus // inferred from direct assay /// 0005634 // nucleus // inferred from electronic annotation /// 0005737 // cytoplasm // inferred from electronic annotation /// 0005954 // calcium- and calmodulin-dependent protein kinase complex // trace	0000166 // nucleotide binding // inferred from electronic annotation /// 0004672 // protein kinase activity // inferred from electronic annotation /// 0004674 // protein serine/threonine kinase activity // inferred from electronic annotation /// 0004683 /	---
226382_at	calcium/calmodulin-dependent protein kinase ID /// hypothetical LOC283070	CAMK1D /// LOC283070	247.767	255.1	41.4529	100	423.983	404.2	81.3429	100	-0.755556	-1.68828	0	69.4444	0.000848064	9.16686e-12	1.87737e-07	7.48852e-11	30.5556	53.3333	46.6667	chr10p13	0006468 // protein phosphorylation // inferred from electronic annotation /// 0042981 // regulation of apoptosis // inferred from electronic annotation	0005634 // nucleus // inferred from direct assay /// 0005634 // nucleus // inferred from electronic annotation /// 0005737 // cytoplasm // inferred from electronic annotation /// 0005954 // calcium- and calmodulin-dependent protein kinase complex // trace	0000166 // nucleotide binding // inferred from electronic annotation /// 0004672 // protein kinase activity // inferred from electronic annotation /// 0004674 // protein serine/threonine kinase activity // inferred from electronic annotation /// 0004683 /	---
226959_at	calcium/calmodulin-dependent protein kinase ID /// hypothetical LOC283070	CAMK1D /// LOC283070	189.417	187.6	35.0699	100	296.35	292.35	31.4229	100	-0.675	-1.5966	0	77.7778	0.00108055	2.92981e-18	1.58194e-12	4.21633e-14	22.2222	93.3333	60	chr10p13	0006468 // protein phosphorylation // inferred from electronic annotation /// 0042981 // regulation of apoptosis // inferred from electronic annotation	0005634 // nucleus // inferred from direct assay /// 0005634 // nucleus // inferred from electronic annotation /// 0005737 // cytoplasm // inferred from electronic annotation /// 0005954 // calcium- and calmodulin-dependent protein kinase complex // trace	0000166 // nucleotide binding // inferred from electronic annotation /// 0004672 // protein kinase activity // inferred from electronic annotation /// 0004674 // protein serine/threonine kinase activity // inferred from electronic annotation /// 0004683 /	---
216598_s_at	chemokine (C-C motif) ligand 2	CCL2	12.7	11.25	10.5997	16.6667	41.2	38.1	27.0276	66.6667	-1.99444	-3.98463	0	61.1111	0.0506334	4.02142e-05	0.00143811	0.000201956	38.8889	60	26.6667	chr17q11.2-q12	0001666 // response to hypoxia // inferred from electronic annotation /// 0001938 // positive regulation of endothelial cell proliferation // inferred from electronic annotation /// 0002548 // monocyte chemotaxis // inferred from direct assay /// 0006468	0005576 // extracellular region // not recorded /// 0005576 // extracellular region // inferred from electronic annotation /// 0005615 // extracellular space // inferred from electronic annotation /// 0005615 // extracellular space // traceable author sta	0001664 // G-protein-coupled receptor binding // inferred from electronic annotation /// 0004672 // protein kinase activity // traceable author statement /// 0004871 // signal transducer activity // traceable author statement /// 0005102 // receptor bindi	---
201700_at	cyclin D3	CCND3	1817.08	1874	685.064	100	1315.35	1311.4	165.913	100	0.402778	1.32205	61.1111	8.33333	0.257163	0.00189874	0.0321326	0.000532028	30.5556	26.6667	66.6667	chr6p21	0001934 // positive regulation of protein phosphorylation // inferred from direct assay /// 0007049 // cell cycle // inferred from electronic annotation /// 0007165 // signal transduction // inferred from electronic annotation /// 0042098 // T cell prolif	0000307 // cyclin-dependent protein kinase holoenzyme complex // inferred from direct assay /// 0005634 // nucleus // inferred from electronic annotation /// 0005737 // cytoplasm // inferred from electronic annotation	0004693 // cyclin-dependent protein kinase activity // inferred from electronic annotation /// 0005515 // protein binding // inferred from physical interaction /// 0005515 // protein binding // inferred from electronic annotation /// 0019901 // protein ki	Cell_cycle_KEGG // GenMAPP /// G1_to_S_cell_cycle_Reactome // GenMAPP /// Wnt_signaling // GenMAPP
207794_at	chemokine (C-C motif) receptor 2	CCR2	248.15	195.45	128.148	100	121.033	97.75	73.7946	100	0.936111	1.91336	66.6667	11.1111	0.0620231	7.9634e-05	0.00136848	0.000726293	22.2222	26.6667	40	chr3p21.31	0006935 // chemotaxis // traceable author statement /// 0006954 // inflammatory response // traceable author statement /// 0006955 // immune response // traceable author statement /// 0006968 // cellular defense response // traceable author statement ///	0005625 // soluble fraction // traceable author statement /// 0005737 // cytoplasm // inferred from direct assay /// 0005886 // plasma membrane // not recorded /// 0005886 // plasma membrane // inferred from direct assay /// 0005886 // plasma membrane //	0004871 // signal transducer activity // inferred from electronic annotation /// 0004872 // receptor activity // inferred from electronic annotation /// 0004930 // G-protein coupled receptor activity // inferred from electronic annotation /// 0004950 // c	GPCRDB_Class_A_Rhodopsin-like // GenMAPP /// GPCRDB_Other // GenMAPP /// Peptide_GPCRs // GenMAPP
206978_at	chemokine (C-C motif) receptor 2	CCR2	4112.22	4253.45	672.063	100	3134.93	2943.3	883.422	100	0.436111	1.35295	63.8889	8.33333	0.0691964	1.84604e-05	5.80221e-05	0.00129287	27.7778	53.3333	33.3333	chr3p21.31	0006935 // chemotaxis // traceable author statement /// 0006954 // inflammatory response // traceable author statement /// 0006955 // immune response // traceable author statement /// 0006968 // cellular defense response // traceable author statement ///	0005625 // soluble fraction // traceable author statement /// 0005737 // cytoplasm // inferred from direct assay /// 0005886 // plasma membrane // not recorded /// 0005886 // plasma membrane // inferred from direct assay /// 0005886 // plasma membrane //	0004871 // signal transducer activity // inferred from electronic annotation /// 0004872 // receptor activity // inferred from electronic annotation /// 0004930 // G-protein coupled receptor activity // inferred from electronic annotation /// 0004950 // c	GPCRDB_Class_A_Rhodopsin-like // GenMAPP /// GPCRDB_Other // GenMAPP /// Peptide_GPCRs // GenMAPP
215049_x_at	CD163 molecule	CD163	4017.05	3724.2	1044.32	100	2740.22	2778.95	395.276	100	0.511111	1.42515	72.2222	2.77778	0.0257108	8.86038e-07	0.000266704	1.02995e-06	25	33.3333	46.6667	chr12p13.3	0006953 // acute-phase response // inferred from electronic annotation /// 0006954 // inflammatory response // inferred from electronic annotation	0005576 // extracellular region // non-traceable author statement /// 0005576 // extracellular region // inferred from electronic annotation /// 0005886 // plasma membrane // inferred from electronic annotation /// 0005887 // integral to plasma membrane /	0005044 // scavenger receptor activity // non-traceable author statement /// 0005044 // scavenger receptor activity // inferred from electronic annotation /// 0005044 // scavenger receptor activity // traceable author statement /// 0005515 // protein bind	---
203645_s_at	CD163 molecule	CD163	3677.52	3543.9	874.367	100	2592.7	2642.05	370.654	100	0.494444	1.40878	66.6667	2.77778	0.0348108	1.85955e-07	5.92896e-05	1.25131e-06	30.5556	46.6667	53.3333	chr12p13.3	0006953 // acute-phase response // inferred from electronic annotation /// 0006954 // inflammatory response // inferred from electronic annotation	0005576 // extracellular region // non-traceable author statement /// 0005576 // extracellular region // inferred from electronic annotation /// 0005886 // plasma membrane // inferred from electronic annotation /// 0005887 // integral to plasma membrane /	0005044 // scavenger receptor activity // non-traceable author statement /// 0005044 // scavenger receptor activity // inferred from electronic annotation /// 0005044 // scavenger receptor activity // traceable author statement /// 0005515 // protein bind	---
216233_at	CD163 molecule	CD163	208.483	69.45	330.319	100	46.3	37.7	22.9048	66.6667	1.33889	2.52956	61.1111	0	0.151462	0.000537173	0.0114358	0.000576363	38.8889	53.3333	53.3333	chr12p13.3	0006953 // acute-phase response // inferred from electronic annotation /// 0006954 // inflammatory response // inferred from electronic annotation	0005576 // extracellular region // non-traceable author statement /// 0005576 // extracellular region // inferred from electronic annotation /// 0005886 // plasma membrane // inferred from electronic annotation /// 0005887 // integral to plasma membrane /	0005044 // scavenger receptor activity // non-traceable author statement /// 0005044 // scavenger receptor activity // inferred from electronic annotation /// 0005044 // scavenger receptor activity // traceable author statement /// 0005515 // protein bind	---
229221_at	CD44 molecule (Indian blood group)	CD44	274.867	280.1	44.0919	100	445.15	378.4	229.252	100	-0.577778	-1.49255	8.33333	61.1111	0.1672	0.000731832	0.000215884	0.0179314	30.5556	60	20	chr11p13	0001558 // regulation of cell growth // inferred from electronic annotation /// 0001658 // branching involved in ureteric bud morphogenesis // inferred from electronic annotation /// 0001955 // blood vessel maturation // inferred from electronic annotatio	0005634 // nucleus // inferred from electronic annotation /// 0005886 // plasma membrane // inferred from direct assay /// 0005886 // plasma membrane // inferred from electronic annotation /// 0005887 // integral to plasma membrane // non-traceable author	0004872 // receptor activity // inferred from electronic annotation /// 0005057 // receptor signaling protein activity // inferred from direct assay /// 0005057 // receptor signaling protein activity // inferred from electronic annotation /// 0005488 // b	---
201925_s_at	CD55 molecule, decay accelerating factor for complement (Cromer blood group)	CD55	3554.2	3366.25	941.766	100	2455.73	2269.2	652.47	100	0.525	1.43893	66.6667	5.55556	0.0358218	9.06029e-06	0.000171912	0.000250883	27.7778	53.3333	46.6667	chr1q32	0006958 // complement activation, classical pathway // inferred from electronic annotation /// 0007204 // elevation of cytosolic calcium ion concentration // inferred from direct assay /// 0045087 // innate immune response // inferred from electronic anno	0005625 // soluble fraction // traceable author statement /// 0005886 // plasma membrane // inferred from electronic annotation /// 0005887 // integral to plasma membrane // traceable author statement /// 0016020 // membrane // inferred from electronic an	---	Complement_Activation_Classical // GenMAPP
204440_at	CD83 molecule	CD83	129.433	95.75	101.266	100	682.267	479.2	567.587	100	-1.96944	-3.91617	5.55556	63.8889	0.0249645	2.04674e-06	2.27422e-06	0.000407137	30.5556	66.6667	13.3333	chr6p23	0006952 // defense response // traceable author statement /// 0006959 // humoral immune response // traceable author statement /// 0007165 // signal transduction // traceable author statement /// 0014070 // response to organic cyclic substance // inferred	0005886 // plasma membrane // traceable author statement /// 0005887 // integral to plasma membrane // traceable author statement /// 0009897 // external side of plasma membrane // inferred from electronic annotation /// 0016020 // membrane // inferred fr	---	---
201005_at	CD9 molecule	CD9	232.7	264.25	103.032	100	505.35	422.6	329.561	100	-0.775	-1.71119	11.1111	61.1111	0.156063	0.0100584	0.0147698	0.0485383	27.7778	46.6667	13.3333	chr12p13.3	0006928 // cellular component movement // inferred from direct assay /// 0007155 // cell adhesion // inferred from direct assay /// 0007155 // cell adhesion // inferred from electronic annotation /// 0007338 // single fertilization // inferred from electr	0005886 // plasma membrane // not recorded /// 0005886 // plasma membrane // non-traceable author statement /// 0005887 // integral to plasma membrane // non-traceable author statement /// 0005887 // integral to plasma membrane // traceable author stateme	0005515 // protein binding // inferred from physical interaction /// 0005515 // protein binding // inferred from electronic annotation	---
229026_at	CDC42 small effector 2	CDC42SE2	731.467	757.55	256.404	100	473.75	463.85	30.3875	100	0.641667	1.56013	63.8889	8.33333	0.0782634	4.17333e-05	0.00442009	7.06361e-06	27.7778	20	80	chr5q23.3-q31.1	0006909 // phagocytosis // inferred from electronic annotation /// 0008360 // regulation of cell shape // inferred from electronic annotation /// 0009966 // regulation of signal transduction // inferred from direct assay	0005737 // cytoplasm // inferred from electronic annotation /// 0005856 // cytoskeleton // inferred from electronic annotation /// 0005886 // plasma membrane // inferred from direct assay /// 0005886 // plasma membrane // inferred from electronic annotati	0005198 // structural molecule activity // inferred from direct assay /// 0005515 // protein binding // inferred from physical interaction	---
204995_at	cyclin-dependent kinase 5, regulatory subunit 1 (p35)	CDK5R1	127.133	133.3	13.0042	100	76.1667	72.7	28.149	100	0.883333	1.84463	72.2222	0	0.0198155	8.34781e-11	1.11818e-11	4.35681e-06	27.7778	93.3333	46.6667	chr17q11.2	0000079 // regulation of cyclin-dependent protein kinase activity // traceable author statement /// 0001764 // neuron migration // inferred from sequence or structural similarity /// 0001764 // neuron migration // inferred from electronic annotation /// 0	0005634 // nucleus // inferred from sequence or structural similarity /// 0005634 // nucleus // inferred from electronic annotation /// 0005737 // cytoplasm // inferred from sequence or structural similarity /// 0005737 // cytoplasm // inferred from elect	0004672 // protein kinase activity // traceable author statement /// 0004693 // cyclin-dependent protein kinase activity // inferred from electronic annotation /// 0005509 // calcium ion binding // inferred from sequence or structural similarity /// 00055	---
219534_x_at	cyclin-dependent kinase inhibitor 1C (p57, Kip2)	CDKN1C	115.117	107	33.9789	100	249.383	191.3	161.539	100	-1.225	-2.33755	5.55556	77.7778	0.0732557	5.4064e-08	2.62197e-07	3.28744e-05	16.6667	40	20	chr11p15.5	0000079 // regulation of cyclin-dependent protein kinase activity // traceable author statement /// 0000080 // G1 phase of mitotic cell cycle // traceable author statement /// 0000122 // negative regulation of transcription from RNA polymerase II promoter	0005634 // nucleus // inferred from direct assay /// 0005634 // nucleus // inferred from electronic annotation /// 0005730 // nucleolus // inferred from direct assay /// 0005737 // cytoplasm // inferred from direct assay	0004860 // protein kinase inhibitor activity // inferred from electronic annotation /// 0004861 // cyclin-dependent protein kinase inhibitor activity // inferred from electronic annotation /// 0004861 // cyclin-dependent protein kinase inhibitor activity	G1_to_S_cell_cycle_Reactome // GenMAPP
213182_x_at	cyclin-dependent kinase inhibitor 1C (p57, Kip2)	CDKN1C	63.5333	60.1	31.3712	100	179.95	142.9	119.478	100	-1.4	-2.63902	2.77778	77.7778	0.0202543	5.7104e-08	2.02658e-06	8.00717e-06	19.4444	33.3333	20	chr11p15.5	0000079 // regulation of cyclin-dependent protein kinase activity // traceable author statement /// 0000080 // G1 phase of mitotic cell cycle // traceable author statement /// 0000122 // negative regulation of transcription from RNA polymerase II promoter	0005634 // nucleus // inferred from direct assay /// 0005634 // nucleus // inferred from electronic annotation /// 0005730 // nucleolus // inferred from direct assay /// 0005737 // cytoplasm // inferred from direct assay	0004860 // protein kinase inhibitor activity // inferred from electronic annotation /// 0004861 // cyclin-dependent protein kinase inhibitor activity // inferred from electronic annotation /// 0004861 // cyclin-dependent protein kinase inhibitor activity	G1_to_S_cell_cycle_Reactome // GenMAPP
213183_s_at	Cyclin-dependent kinase inhibitor 1C (p57, Kip2)	CDKN1C	58.95	59.75	20.4493	83.3333	144.133	124.2	79.7042	83.3333	-1.00556	-2.00772	2.77778	63.8889	0.0389101	6.55901e-06	1.84646e-05	0.000707186	33.3333	80	26.6667	chr11p15.5	0000079 // regulation of cyclin-dependent protein kinase activity // traceable author statement /// 0000080 // G1 phase of mitotic cell cycle // traceable author statement /// 0000122 // negative regulation of transcription from RNA polymerase II promoter	0005634 // nucleus // inferred from direct assay /// 0005634 // nucleus // inferred from electronic annotation /// 0005730 // nucleolus // inferred from direct assay /// 0005737 // cytoplasm // inferred from direct assay	0004860 // protein kinase inhibitor activity // inferred from electronic annotation /// 0004861 // cyclin-dependent protein kinase inhibitor activity // inferred from electronic annotation /// 0004861 // cyclin-dependent protein kinase inhibitor activity	G1_to_S_cell_cycle_Reactome // GenMAPP
213348_at	cyclin-dependent kinase inhibitor 1C (p57, Kip2)	CDKN1C	240.817	226.5	96.1115	100	630.45	464.25	385.355	100	-1.19722	-2.29298	2.77778	75	0.0409599	1.30969e-06	5.57494e-06	0.000217342	22.2222	40	26.6667	chr11p15.5	0000079 // regulation of cyclin-dependent protein kinase activity // traceable author statement /// 0000080 // G1 phase of mitotic cell cycle // traceable author statement /// 0000122 // negative regulation of transcription from RNA polymerase II promoter	0005634 // nucleus // inferred from direct assay /// 0005634 // nucleus // inferred from electronic annotation /// 0005730 // nucleolus // inferred from direct assay /// 0005737 // cytoplasm // inferred from direct assay	0004860 // protein kinase inhibitor activity // inferred from electronic annotation /// 0004861 // cyclin-dependent protein kinase inhibitor activity // inferred from electronic annotation /// 0004861 // cyclin-dependent protein kinase inhibitor activity	G1_to_S_cell_cycle_Reactome // GenMAPP
216894_x_at	cyclin-dependent kinase inhibitor 1C (p57, Kip2)	CDKN1C	117.95	109.45	35.1223	100	170.183	163.7	75.8504	100	-0.811111	-1.75456	2.77778	69.4444	0.234065	3.41475e-06	1.65055e-06	0.000959494	27.7778	60	33.3333	chr11p15.5	0000079 // regulation of cyclin-dependent protein kinase activity // traceable author statement /// 0000080 // G1 phase of mitotic cell cycle // traceable author statement /// 0000122 // negative regulation of transcription from RNA polymerase II promoter	0005634 // nucleus // inferred from direct assay /// 0005634 // nucleus // inferred from electronic annotation /// 0005730 // nucleolus // inferred from direct assay /// 0005737 // cytoplasm // inferred from direct assay	0004860 // protein kinase inhibitor activity // inferred from electronic annotation /// 0004861 // cyclin-dependent protein kinase inhibitor activity // inferred from electronic annotation /// 0004861 // cyclin-dependent protein kinase inhibitor activity	G1_to_S_cell_cycle_Reactome // GenMAPP
236313_at	cyclin-dependent kinase inhibitor 2B (p15, inhibits CDK4)	CDKN2B	100.817	98.4	38.812	100	65.55	50.45	40.9112	100	0.766667	1.70133	63.8889	13.8889	0.117313	0.000132188	0.000420507	0.00289855	22.2222	46.6667	40	chr9p21	0000079 // regulation of cyclin-dependent protein kinase activity // inferred from direct assay /// 0000086 // G2/M transition of mitotic cell cycle // inferred from mutant phenotype /// 0007049 // cell cycle // inferred from electronic annotation /// 000	0005634 // nucleus // inferred from direct assay /// 0005737 // cytoplasm // inferred from direct assay	0004861 // cyclin-dependent protein kinase inhibitor activity // inferred from direct assay /// 0004861 // cyclin-dependent protein kinase inhibitor activity // non-traceable author statement /// 0005515 // protein binding // inferred from physical intera	G1_to_S_cell_cycle_Reactome // GenMAPP
205382_s_at	complement factor D (adipsin)	CFD	2458.72	2483.95	642.652	100	4216.5	4178.55	753.585	100	-0.766667	-1.70133	0	86.1111	0.00636673	2.62636e-11	9.22468e-07	7.12537e-11	13.8889	33.3333	66.6667	chr19p13.3	0006508 // proteolysis // inferred from electronic annotation /// 0006508 // proteolysis // traceable author statement /// 0006956 // complement activation // traceable author statement /// 0006957 // complement activation, alternative pathway // not reco	0005576 // extracellular region // inferred from electronic annotation /// 0005615 // extracellular space // inferred from electronic annotation	0003824 // catalytic activity // inferred from electronic annotation /// 0004175 // endopeptidase activity // inferred from electronic annotation /// 0004252 // serine-type endopeptidase activity // inferred from electronic annotation /// 0004252 // serin	---
203921_at	carbohydrate (N-acetylglucosamine-6-O) sulfotransferase 2	CHST2	245.967	207.75	80.5698	100	477.417	494.45	168.525	100	-0.777778	-1.71449	5.55556	66.6667	0.0163795	9.91663e-07	1.99424e-05	6.45678e-05	27.7778	33.3333	20	chr3q24	0005975 // carbohydrate metabolic process // inferred from electronic annotation /// 0006044 // N-acetylglucosamine metabolic process // inferred from direct assay /// 0006790 // sulfur compound metabolic process // inferred from direct assay /// 0006954	0000139 // Golgi membrane // inferred from electronic annotation /// 0005794 // Golgi apparatus // inferred from electronic annotation /// 0005802 // trans-Golgi network // inferred from direct assay /// 0016020 // membrane // inferred from electronic ann	0001517 // N-acetylglucosamine 6-O-sulfotransferase activity // inferred from direct assay /// 0008146 // sulfotransferase activity // traceable author statement /// 0008146 // sulfotransferase activity // inferred from electronic annotation /// 0016740 /	---
205101_at	class II, major histocompatibility complex, transactivator	CIITA	206.65	199.05	68.1472	100	369.017	364.85	138.434	100	-0.677778	-1.59967	2.77778	63.8889	0.0481741	5.32884e-06	5.57936e-05	0.000244015	33.3333	66.6667	53.3333	chr16p13	0006350 // transcription // inferred from electronic annotation /// 0006954 // inflammatory response // inferred from electronic annotation /// 0006955 // immune response // traceable author statement /// 0010553 // negative regulation of gene-specific tr	0005634 // nucleus // inferred from electronic annotation	0000166 // nucleotide binding // inferred from electronic annotation /// 0003677 // DNA binding // traceable author statement /// 0003702 // RNA polymerase II transcription factor activity // traceable author statement /// 0003713 // transcription coactiv	---
206682_at	C-type lectin domain family 10, member A	CLEC10A	259.3	273	86.8449	100	479.883	432.4	148.318	100	-0.811111	-1.75456	0	69.4444	0.0215886	3.86154e-07	0.000142908	3.21877e-06	30.5556	40	33.3333	chr17p13.1	0006897 // endocytosis // inferred from electronic annotation /// 0045087 // innate immune response // inferred from electronic annotation	0005886 // plasma membrane // traceable author statement /// 0016020 // membrane // inferred from electronic annotation /// 0016021 // integral to membrane // inferred from electronic annotation	0005488 // binding // inferred from electronic annotation /// 0005529 // sugar binding // inferred from electronic annotation /// 0005529 // sugar binding // traceable author statement	---
1552772_at	C-type lectin domain family 4, member D	CLEC4D	968.967	933.35	385.361	100	531.75	390.35	213.574	100	0.797222	1.73775	83.3333	0	0.0401809	2.79925e-08	1.09878e-05	4.38206e-07	16.6667	33.3333	46.6667	chr12p13.31	0045087 // innate immune response // inferred from electronic annotation	0016020 // membrane // inferred from electronic annotation /// 0016021 // integral to membrane // inferred from electronic annotation	0005488 // binding // inferred from electronic annotation /// 0005529 // sugar binding // inferred from electronic annotation	---
1552773_at	C-type lectin domain family 4, member D	CLEC4D	1220.67	1072.2	378.375	100	634.333	555.75	139.288	100	0.891667	1.85532	83.3333	0	0.00404273	6.68622e-10	1.7217e-06	8.97991e-09	16.6667	33.3333	53.3333	chr12p13.31	0045087 // innate immune response // inferred from electronic annotation	0016020 // membrane // inferred from electronic annotation /// 0016021 // integral to membrane // inferred from electronic annotation	0005488 // binding // inferred from electronic annotation /// 0005529 // sugar binding // inferred from electronic annotation	---
219859_at	C-type lectin domain family 4, member E	CLEC4E	563.983	539.55	195.466	100	335.183	266.05	150.447	100	0.786111	1.72442	66.6667	11.1111	0.0514962	3.25637e-05	0.000248525	0.000756687	22.2222	20	26.6667	chr12p13.31	---	0016020 // membrane // inferred from electronic annotation /// 0016021 // integral to membrane // inferred from electronic annotation	0005488 // binding // inferred from electronic annotation /// 0005529 // sugar binding // inferred from electronic annotation /// 0005529 // sugar binding // traceable author statement	---
222934_s_at	C-type lectin domain family 4, member E	CLEC4E	3440.42	2902.95	1391.94	100	2280.12	2157.1	803.051	100	0.594444	1.50989	63.8889	11.1111	0.138951	0.000746649	0.0061649	0.00341827	25	13.3333	20	chr12p13.31	---	0016020 // membrane // inferred from electronic annotation /// 0016021 // integral to membrane // inferred from electronic annotation	0005488 // binding // inferred from electronic annotation /// 0005529 // sugar binding // inferred from electronic annotation /// 0005529 // sugar binding // traceable author statement	---
219890_at	C-type lectin domain family 5, member A	CLEC5A	190.667	179.8	45.8856	100	128.083	128.45	20.1985	100	0.644444	1.56314	75	0	0.0145002	3.85601e-09	3.04641e-07	1.03514e-06	25	40	46.6667	chr7q33	0006968 // cellular defense response // traceable author statement /// 0007165 // signal transduction // traceable author statement	0005887 // integral to plasma membrane // traceable author statement /// 0016020 // membrane // inferred from electronic annotation /// 0016021 // integral to membrane // inferred from electronic annotation	0005488 // binding // inferred from electronic annotation /// 0005488 // binding // traceable author statement /// 0005529 // sugar binding // inferred from electronic annotation	---
244413_at	C-type lectin-like 1	CLECL1	116.083	94.3	65.5557	83.3333	256.133	264.35	41.6706	100	-1.26389	-2.40142	0	75	0.0128669	4.85762e-11	5.92667e-06	3.48156e-12	25	46.6667	80	chr12p13.31	---	0005886 // plasma membrane // inferred from electronic annotation /// 0016020 // membrane // inferred from electronic annotation /// 0016021 // integral to membrane // inferred from electronic annotation	0005488 // binding // inferred from electronic annotation /// 0005529 // sugar binding // inferred from electronic annotation	---
201560_at	chloride intracellular channel 4	CLIC4	974.85	950.5	162.742	100	750.017	752.6	76.645	100	0.325	1.25266	63.8889	5.55556	0.0180213	5.88705e-05	0.00741439	5.55156e-06	30.5556	53.3333	86.6667	chr1p36.11	0006810 // transport // inferred from electronic annotation /// 0006811 // ion transport // inferred from electronic annotation /// 0006821 // chloride transport // non-traceable author statement /// 0006821 // chloride transport // inferred from electron	0005622 // intracellular // inferred from direct assay /// 0005625 // soluble fraction // inferred from direct assay /// 0005634 // nucleus // inferred from electronic annotation /// 0005737 // cytoplasm // inferred from direct assay /// 0005737 // cytopl	0005216 // ion channel activity // inferred from electronic annotation /// 0005244 // voltage-gated ion channel activity // inferred from electronic annotation /// 0005247 // voltage-gated chloride channel activity // inferred from electronic annotation /	---
201098_at	coatomer protein complex, subunit beta 2 (beta prime)	COPB2	1323.83	1319.1	186.763	100	1071.4	1027.8	164.188	100	0.261111	1.1984	63.8889	5.55556	0.0460546	0.000151406	0.00112461	0.00181063	30.5556	60	46.6667	chr3q23	0006810 // transport // inferred from electronic annotation /// 0006886 // intracellular protein transport // inferred from electronic annotation /// 0006890 // retrograde vesicle-mediated transport, Golgi to ER // not recorded /// 0006890 // retrograde v	0000139 // Golgi membrane // inferred from electronic annotation /// 0005737 // cytoplasm // inferred from electronic annotation /// 0005794 // Golgi apparatus // inferred from electronic annotation /// 0005829 // cytosol // not recorded /// 0016020 // me	0005198 // structural molecule activity // inferred from electronic annotation /// 0005488 // binding // inferred from electronic annotation /// 0005515 // protein binding // inferred from physical interaction /// 0005515 // protein binding // inferred fr	---
201941_at	carboxypeptidase D	CPD	1147.53	1136.65	177.248	100	856.017	908.15	138.647	100	0.458333	1.37395	63.8889	0	0.0174209	3.55565e-08	3.96287e-06	5.54198e-06	36.1111	66.6667	60	chr17q11.2	0006508 // proteolysis // inferred from electronic annotation	0005624 // membrane fraction // traceable author statement /// 0005634 // nucleus // inferred from electronic annotation /// 0005792 // microsome // inferred from electronic annotation /// 0005802 // trans-Golgi network // inferred from electronic annotat	0004180 // carboxypeptidase activity // inferred from electronic annotation /// 0004181 // metallocarboxypeptidase activity // inferred from electronic annotation /// 0004185 // serine-type carboxypeptidase activity // inferred from electronic annotation	---
205081_at	cysteine-rich protein 1 (intestinal)	CRIP1	1530.47	1408	639.732	100	2745.5	2924.65	649.731	100	-0.952778	-1.9356	2.77778	75	0.0200186	5.91217e-08	6.98716e-05	2.02315e-07	22.2222	6.66667	53.3333	chr14q32.33	0008283 // cell proliferation // traceable author statement	0005737 // cytoplasm // traceable author statement	0008270 // zinc ion binding // inferred from electronic annotation /// 0008270 // zinc ion binding // traceable author statement /// 0046872 // metal ion binding // inferred from electronic annotation	---
221541_at	cysteine-rich secretory protein LCCL domain containing 2	CRISPLD2	2151.95	2137.1	356.806	100	1552.27	1574.2	334.824	100	0.483333	1.39797	63.8889	0	0.0218219	7.01633e-07	3.57402e-06	0.000210048	36.1111	66.6667	40	chr16q24.1	0030198 // extracellular matrix organization // inferred from electronic annotation	0005576 // extracellular region // inferred from electronic annotation /// 0030133 // transport vesicle // inferred from direct assay /// 0031012 // extracellular matrix // inferred from electronic annotation	0005539 // glycosaminoglycan binding // inferred from electronic annotation /// 0008201 // heparin binding // inferred from electronic annotation	---
203104_at	colony stimulating factor 1 receptor	CSF1R	511.667	501.15	47.6884	100	790.25	761.6	94.7856	100	-0.586111	-1.50119	0	75	7.4384e-05	1.32223e-29	4.39709e-21	1.29478e-22	25	93.3333	100	chr5q32	0006468 // protein phosphorylation // inferred from electronic annotation /// 0007165 // signal transduction // traceable author statement /// 0007169 // transmembrane receptor protein tyrosine kinase signaling pathway // inferred from electronic annotati	0005886 // plasma membrane // inferred from electronic annotation /// 0005886 // plasma membrane // traceable author statement /// 0005887 // integral to plasma membrane // inferred from electronic annotation /// 0005887 // integral to plasma membrane //	0000166 // nucleotide binding // inferred from electronic annotation /// 0004672 // protein kinase activity // inferred from electronic annotation /// 0004713 // protein tyrosine kinase activity // inferred from electronic annotation /// 0004714 // transm	---
219049_at	chondroitin sulfate N-acetylgalactosaminyltransferase 1	CSGALNACT1	321.2	355.75	128.906	100	144.933	132.55	100.406	100	1.20278	2.30182	72.2222	11.1111	0.101524	0.00116197	0.00920032	0.00434043	16.6667	46.6667	20	chr8p21.3	0007399 // nervous system development // non-traceable author statement /// 0008037 // cell recognition // non-traceable author statement /// 0008283 // cell proliferation // non-traceable author statement /// 0009653 // anatomical structure morphogenesis	0005622 // intracellular // inferred by curator /// 0005625 // soluble fraction // inferred from direct assay /// 0005794 // Golgi apparatus // inferred from electronic annotation /// 0016020 // membrane // inferred from electronic annotation /// 0016021	0008376 // acetylgalactosaminyltransferase activity // inferred from direct assay /// 0008376 // acetylgalactosaminyltransferase activity // inferred from sequence or structural similarity /// 0008955 // peptidoglycan glycosyltransferase activity // infer	---
225557_at	cysteine-serine-rich nuclear protein 1	CSRNP1	256.317	222.05	96.2301	100	491.183	442	225.912	100	-0.7	-1.6245	8.33333	63.8889	0.0971755	0.000270205	0.000493028	0.006099	27.7778	40	20	chr3p22	0006350 // transcription // inferred from electronic annotation /// 0006355 // regulation of transcription, DNA-dependent // inferred from electronic annotation /// 0006915 // apoptosis // non-traceable author statement /// 0006915 // apoptosis // inferre	0005634 // nucleus // inferred from sequence or structural similarity /// 0005634 // nucleus // inferred from electronic annotation	0003677 // DNA binding // inferred from electronic annotation /// 0003700 // sequence-specific DNA binding transcription factor activity // inferred from sequence or structural similarity /// 0003700 // sequence-specific DNA binding transcription factor a	---
209201_x_at	chemokine (C-X-C motif) receptor 4	CXCR4	1919.4	1314.9	1265.43	100	848.567	735.75	325.287	100	0.9	1.86607	63.8889	11.1111	0.108407	0.00061664	0.0127837	0.000487744	25	13.3333	26.6667	chr2q21	0000187 // activation of MAPK activity // traceable author statement /// 0001569 // patterning of blood vessels // inferred from electronic annotation /// 0001666 // response to hypoxia // inferred from expression pattern /// 0001667 // ameboidal cell mig	0005737 // cytoplasm // traceable author statement /// 0005886 // plasma membrane // not recorded /// 0005886 // plasma membrane // inferred from electronic annotation /// 0005886 // plasma membrane // traceable author statement /// 0009986 // cell surfac	0003779 // actin binding // inferred from direct assay /// 0004871 // signal transducer activity // inferred from electronic annotation /// 0004872 // receptor activity // inferred from electronic annotation /// 0004930 // G-protein coupled receptor activ	GPCRDB_Class_A_Rhodopsin-like // GenMAPP /// Peptide_GPCRs // GenMAPP
211919_s_at	chemokine (C-X-C motif) receptor 4	CXCR4	1665.45	1191.45	1047.58	100	748.217	692.8	308.605	100	0.938889	1.91705	63.8889	8.33333	0.0851702	0.000270855	0.00699747	0.000344119	27.7778	13.3333	20	chr2q21	0000187 // activation of MAPK activity // traceable author statement /// 0001569 // patterning of blood vessels // inferred from electronic annotation /// 0001666 // response to hypoxia // inferred from expression pattern /// 0001667 // ameboidal cell mig	0005737 // cytoplasm // traceable author statement /// 0005886 // plasma membrane // not recorded /// 0005886 // plasma membrane // inferred from electronic annotation /// 0005886 // plasma membrane // traceable author statement /// 0009986 // cell surfac	0003779 // actin binding // inferred from direct assay /// 0004871 // signal transducer activity // inferred from electronic annotation /// 0004872 // receptor activity // inferred from electronic annotation /// 0004930 // G-protein coupled receptor activ	GPCRDB_Class_A_Rhodopsin-like // GenMAPP /// Peptide_GPCRs // GenMAPP
217028_at	chemokine (C-X-C motif) receptor 4	CXCR4	5777.57	4755.95	2695.48	100	3736.63	3654.35	426.47	100	0.611111	1.52744	61.1111	8.33333	0.161909	0.000964827	0.0211098	0.000369395	30.5556	20	33.3333	chr2q21	0000187 // activation of MAPK activity // traceable author statement /// 0001569 // patterning of blood vessels // inferred from electronic annotation /// 0001666 // response to hypoxia // inferred from expression pattern /// 0001667 // ameboidal cell mig	0005737 // cytoplasm // traceable author statement /// 0005886 // plasma membrane // not recorded /// 0005886 // plasma membrane // inferred from electronic annotation /// 0005886 // plasma membrane // traceable author statement /// 0009986 // cell surfac	0003779 // actin binding // inferred from direct assay /// 0004871 // signal transducer activity // inferred from electronic annotation /// 0004872 // receptor activity // inferred from electronic annotation /// 0004930 // G-protein coupled receptor activ	GPCRDB_Class_A_Rhodopsin-like // GenMAPP /// Peptide_GPCRs // GenMAPP
232618_at	chromosome Y open reading frame 15A	CYorf15A	13.9833	2.95	21.6927	16.6667	104.783	136.45	73.5488	66.6667	-3.31111	-9.9253	5.55556	66.6667	0.0797278	7.5925e-05	0.000412328	0.00160249	27.7778	66.6667	40	chrYq11.222	---	---	---	---
214131_at	chromosome Y open reading frame 15B	CYorf15B	9.61667	3.1	14.2663	16.6667	139.333	137.9	107.989	66.6667	-3.71944	-13.1724	5.55556	63.8889	0.00847902	1.45726e-08	1.21033e-06	4.67342e-06	30.5556	66.6667	13.3333	chrYq11.222	---	---	---	---
223646_s_at	chromosome Y open reading frame 15B	CYorf15B	9.9	7.15	10.8887	16.6667	97.8333	119.15	72.3704	66.6667	-2.36111	-5.13766	5.55556	66.6667	0.147546	0.000255341	0.000236965	0.00830393	27.7778	73.3333	33.3333	chrYq11.222	---	---	---	---
228915_at	dachshund homolog 1 (Drosophila)	DACH1	112.867	100.2	41.1339	100	53.25	54.35	13.9299	83.3333	0.936111	1.91336	63.8889	0	0.00335415	1.2043e-11	8.30465e-08	1.401e-09	36.1111	60	86.6667	chr13q22	0006350 // transcription // inferred from electronic annotation /// 0007275 // multicellular organismal development // inferred from electronic annotation /// 0045449 // regulation of transcription // inferred from electronic annotation	0005634 // nucleus // inferred from direct assay /// 0005634 // nucleus // inferred from electronic annotation /// 0005667 // transcription factor complex // inferred from electronic annotation /// 0005737 // cytoplasm // inferred from electronic annotati	0000166 // nucleotide binding // inferred from electronic annotation /// 0003677 // DNA binding // inferred from electronic annotation /// 0003700 // sequence-specific DNA binding transcription factor activity // inferred from electronic annotation /// 00	---
205000_at	DEAD (Asp-Glu-Ala-Asp) box polypeptide 3, Y-linked	DDX3Y	114.467	9.35	240.956	16.6667	922.7	1184.5	687.684	66.6667	-3.08056	-8.4594	5.55556	66.6667	0.312455	0.0283642	0.0235181	0.118794	27.7778	66.6667	26.6667	chrYq11	---	0005634 // nucleus // inferred from electronic annotation /// 0005737 // cytoplasm // inferred from direct assay /// 0005737 // cytoplasm // inferred from electronic annotation	0000166 // nucleotide binding // inferred from electronic annotation /// 0003676 // nucleic acid binding // inferred from electronic annotation /// 0003677 // DNA binding // inferred from electronic annotation /// 0003723 // RNA binding // inferred from e	---
205001_s_at	DEAD (Asp-Glu-Ala-Asp) box polypeptide 3, Y-linked	DDX3Y	43.9167	1.65	86.6807	16.6667	449.9	552.45	339.873	66.6667	-4.01667	-16.1859	5.55556	66.6667	0.0738107	0.000212644	0.000566335	0.00422122	27.7778	66.6667	26.6667	chrYq11	---	0005634 // nucleus // inferred from electronic annotation /// 0005737 // cytoplasm // inferred from direct assay /// 0005737 // cytoplasm // inferred from electronic annotation	0000166 // nucleotide binding // inferred from electronic annotation /// 0003676 // nucleic acid binding // inferred from electronic annotation /// 0003677 // DNA binding // inferred from electronic annotation /// 0003723 // RNA binding // inferred from e	---
219799_s_at	dehydrogenase/reductase (SDR family) member 9	DHRS9	252.4	277.55	72.5929	100	395.517	445.45	139.754	100	-0.580556	-1.49542	8.33333	61.1111	0.150872	0.00142342	0.00479739	0.0118434	30.5556	53.3333	46.6667	chr2q31.1	0008152 // metabolic process // inferred from electronic annotation /// 0008209 // androgen metabolic process // inferred from direct assay /// 0008209 // androgen metabolic process // inferred from sequence or structural similarity /// 0030855 // epithel	0005783 // endoplasmic reticulum // inferred from electronic annotation /// 0005789 // endoplasmic reticulum membrane // inferred from electronic annotation /// 0005792 // microsome // inferred from direct assay /// 0005792 // microsome // inferred from e	0003824 // catalytic activity // inferred from electronic annotation /// 0004022 // alcohol dehydrogenase (NAD) activity // inferred from direct assay /// 0004022 // alcohol dehydrogenase (NAD) activity // inferred from sequence or structural similarity /	---
219452_at	dipeptidase 2	DPEP2	815.233	780.85	131.531	100	1063.5	1013	242.983	100	-0.311111	-1.24066	5.55556	61.1111	0.0847305	0.000133455	0.000539373	0.00296474	33.3333	73.3333	60	chr16q22.1	0006508 // proteolysis // inferred from electronic annotation	0016020 // membrane // inferred from electronic annotation /// 0031225 // anchored to membrane // inferred from electronic annotation	0008233 // peptidase activity // inferred from electronic annotation /// 0008235 // metalloexopeptidase activity // inferred from electronic annotation /// 0008237 // metallopeptidase activity // inferred from electronic annotation /// 0008238 // exopepti	---
226817_at	desmocollin 2	DSC2	1154.17	1177.25	408.851	100	767.45	774.35	193.979	100	0.522222	1.43617	63.8889	11.1111	0.127085	0.000901678	0.0116015	0.00155717	25	20	26.6667	chr18q12.1	0007155 // cell adhesion // inferred from electronic annotation /// 0007155 // cell adhesion // traceable author statement /// 0007156 // homophilic cell adhesion // inferred from electronic annotation	0005886 // plasma membrane // inferred from electronic annotation /// 0016020 // membrane // inferred from electronic annotation /// 0016021 // integral to membrane // inferred from electronic annotation /// 0030054 // cell junction // inferred from elect	0005509 // calcium ion binding // inferred from electronic annotation	---
219298_at	enoyl CoA hydratase domain containing 3	ECHDC3	598.05	332.55	563.199	100	206.75	178.95	83.9935	100	0.977778	1.96943	69.4444	0	0.0747986	0.000103001	0.00797569	1.36351e-05	30.5556	40	80	chr10p14	0008152 // metabolic process // inferred from electronic annotation	0005739 // mitochondrion // inferred from electronic annotation	0003824 // catalytic activity // inferred from electronic annotation	---
201694_s_at	early growth response 1	EGR1	1208.03	1267.65	644.988	100	2843.17	2324.85	2166.21	100	-0.952778	-1.9356	22.2222	63.8889	0.167311	0.0100994	0.0208306	0.0438294	13.8889	26.6667	6.66667	chr5q31.1	0000122 // negative regulation of transcription from RNA polymerase II promoter // inferred from electronic annotation /// 0006350 // transcription // inferred from electronic annotation /// 0006355 // regulation of transcription, DNA-dependent // inferre	0005622 // intracellular // inferred from electronic annotation /// 0005634 // nucleus // inferred from sequence or structural similarity /// 0005634 // nucleus // inferred from electronic annotation /// 0005737 // cytoplasm // inferred from sequence or s	0003676 // nucleic acid binding // inferred from electronic annotation /// 0003677 // DNA binding // inferred from direct assay /// 0003677 // DNA binding // inferred from electronic annotation /// 0003690 // double-stranded DNA binding // inferred from e	Ovarian_Infertility_Genes // GenMAPP
205249_at	early growth response 2	EGR2	215.633	142	174.235	83.3333	776.55	675.3	730.99	83.3333	-1.325	-2.50533	13.8889	63.8889	0.121233	0.00063204	0.00062138	0.0128833	22.2222	20	20	chr10q21.1	0006350 // transcription // inferred from electronic annotation /// 0006355 // regulation of transcription, DNA-dependent // inferred from electronic annotation /// 0007420 // brain development // traceable author statement /// 0007422 // peripheral nervo	0005622 // intracellular // inferred from electronic annotation /// 0005634 // nucleus // inferred from electronic annotation	0003676 // nucleic acid binding // inferred from electronic annotation /// 0003677 // DNA binding // inferred from electronic annotation /// 0003700 // sequence-specific DNA binding transcription factor activity // inferred from direct assay /// 0003700 /	---
206115_at	early growth response 3	EGR3	93.6	63.85	94.6269	100	472.517	245.2	477.97	100	-2.08611	-4.24602	13.8889	61.1111	0.085801	0.000126588	0.000486617	0.00248216	25	60	13.3333	chr8p23-p21	0006350 // transcription // inferred from electronic annotation /// 0007274 // neuromuscular synaptic transmission // inferred from electronic annotation /// 0007422 // peripheral nervous system development // inferred from electronic annotation /// 00075	0005622 // intracellular // inferred from electronic annotation /// 0005634 // nucleus // inferred from electronic annotation	0003676 // nucleic acid binding // inferred from electronic annotation /// 0003677 // DNA binding // inferred from electronic annotation /// 0003700 // sequence-specific DNA binding transcription factor activity // traceable author statement /// 0008270 /	---
204409_s_at	eukaryotic translation initiation factor 1A, Y-linked	EIF1AY	127.067	11.15	265.882	16.6667	655.7	835.05	495.838	66.6667	-3.60833	-12.196	5.55556	63.8889	0.101665	0.000505533	0.00137972	0.00844737	30.5556	66.6667	33.3333	chrYq11.223	0006412 // translation // inferred from electronic annotation /// 0006413 // translational initiation // inferred from electronic annotation	0005737 // cytoplasm // inferred from direct assay	0003723 // RNA binding // inferred from electronic annotation /// 0003743 // translation initiation factor activity // inferred from electronic annotation /// 0005515 // protein binding // inferred from physical interaction	Translation_Factors // GenMAPP
204410_at	eukaryotic translation initiation factor 1A, Y-linked	EIF1AY	38.5	6.85	71.0126	16.6667	194.7	240.2	139.433	66.6667	-2.70278	-6.51054	5.55556	63.8889	0.0478874	3.0494e-05	0.000208247	0.000926179	30.5556	66.6667	26.6667	chrYq11.223	0006412 // translation // inferred from electronic annotation /// 0006413 // translational initiation // inferred from electronic annotation	0005737 // cytoplasm // inferred from direct assay	0003723 // RNA binding // inferred from electronic annotation /// 0003743 // translation initiation factor activity // inferred from electronic annotation /// 0005515 // protein binding // inferred from physical interaction	Translation_Factors // GenMAPP
205321_at	eukaryotic translation initiation factor 2, subunit 3 gamma, 52kDa	EIF2S3	702.267	680.8	165.733	100	554.283	542.5	119.303	100	0.380556	1.30184	61.1111	8.33333	0.150629	0.000487801	0.00603132	0.00196567	30.5556	26.6667	40	chrXp22.2-p22.1	0006412 // translation // inferred from electronic annotation /// 0006413 // translational initiation // inferred from direct assay	0005829 // cytosol // not recorded	0000166 // nucleotide binding // inferred from electronic annotation /// 0003743 // translation initiation factor activity // inferred from direct assay /// 0003743 // translation initiation factor activity // inferred from electronic annotation /// 00039	Translation_Factors // GenMAPP
238461_at	eukaryotic translation initiation factor 4E family member 3	EIF4E3	269.933	277.9	64.7095	100	149.767	148.8	48.8568	100	0.813889	1.75794	69.4444	0	0.0162426	1.76857e-07	6.12821e-07	6.86974e-05	30.5556	53.3333	53.3333	chr3p14	0006412 // translation // inferred from electronic annotation /// 0006413 // translational initiation // inferred from electronic annotation /// 0006417 // regulation of translation // inferred from electronic annotation	0005737 // cytoplasm // inferred from electronic annotation /// 0005845 // mRNA cap binding complex // inferred from sequence or structural similarity	0003723 // RNA binding // inferred from electronic annotation /// 0003743 // translation initiation factor activity // inferred from electronic annotation	---
201324_at	epithelial membrane protein 1	EMP1	96.5167	82	51.8306	100	350.55	298.9	205.055	100	-1.65	-3.13834	2.77778	88.8889	0.00836905	3.55622e-09	4.40263e-07	7.70258e-07	8.33333	20	26.6667	chr12p12.3	0007275 // multicellular organismal development // traceable author statement /// 0008283 // cell proliferation // traceable author statement /// 0008544 // epidermis development // traceable author statement /// 0016049 // cell growth // inferred from el	0005624 // membrane fraction // traceable author statement /// 0005886 // plasma membrane // inferred from electronic annotation /// 0016020 // membrane // inferred from electronic annotation /// 0016021 // integral to membrane // inferred from electronic	---	---
201325_s_at	epithelial membrane protein 1	EMP1	22.7	22.6	14.1511	50	92.1167	71	62.0501	66.6667	-2.18333	-4.54202	2.77778	63.8889	0.0243324	6.30999e-08	9.41386e-05	5.71607e-08	33.3333	60	20	chr12p12.3	0007275 // multicellular organismal development // traceable author statement /// 0008283 // cell proliferation // traceable author statement /// 0008544 // epidermis development // traceable author statement /// 0016049 // cell growth // inferred from el	0005624 // membrane fraction // traceable author statement /// 0005886 // plasma membrane // inferred from electronic annotation /// 0016020 // membrane // inferred from electronic annotation /// 0016021 // integral to membrane // inferred from electronic	---	---
202441_at	ER lipid raft associated 1	ERLIN1	1286.9	1204.1	330.504	100	794.417	767.25	71.1797	100	0.647222	1.56615	69.4444	0	0.00588701	2.08441e-08	4.17827e-05	5.19435e-09	30.5556	46.6667	86.6667	chr10q21-q22	0030433 // ER-associated protein catabolic process // inferred from direct assay	0005783 // endoplasmic reticulum // inferred from direct assay /// 0005783 // endoplasmic reticulum // inferred from electronic annotation /// 0005789 // endoplasmic reticulum membrane // inferred from direct assay /// 0005789 // endoplasmic reticulum mem	0005515 // protein binding // inferred from physical interaction	---
226432_at	ethanolamine kinase 1	ETNK1	334.217	333.95	67.3333	100	241.433	225.45	35.6366	100	0.527778	1.44171	61.1111	2.77778	0.0207679	9.77604e-07	0.000235074	1.49656e-06	36.1111	46.6667	80	chr12p12.1	0006646 // phosphatidylethanolamine biosynthetic process // inferred from direct assay /// 0008654 // phospholipid biosynthetic process // inferred from electronic annotation	0005737 // cytoplasm // non-traceable author statement /// 0005737 // cytoplasm // inferred from electronic annotation	0000166 // nucleotide binding // inferred from electronic annotation /// 0004305 // ethanolamine kinase activity // inferred from direct assay /// 0004305 // ethanolamine kinase activity // inferred from electronic annotation /// 0005524 // ATP binding //	---
217838_s_at	Enah/Vasp-like	EVL	271.4	284.85	61.1567	100	449.75	460.3	105.946	100	-0.683333	-1.60585	0	69.4444	0.00787544	2.49347e-08	4.9192e-07	9.39524e-06	30.5556	53.3333	40	chr14q32.2	0007015 // actin filament organization // traceable author statement /// 0007166 // cell surface receptor linked signaling pathway // non-traceable author statement /// 0007399 // nervous system development // non-traceable author statement /// 0008154 //	0005737 // cytoplasm // inferred from sequence or structural similarity /// 0005737 // cytoplasm // inferred from electronic annotation /// 0005829 // cytosol // not recorded /// 0005856 // cytoskeleton // inferred from electronic annotation /// 0005925 /	0003779 // actin binding // inferred from electronic annotation /// 0005515 // protein binding // inferred from physical interaction /// 0005515 // protein binding // inferred from electronic annotation /// 0005522 // profilin binding // inferred from seq	---
217234_s_at	ezrin	EZR	308.133	305.25	70.3209	100	402.7	402.75	80.8139	100	-0.486111	-1.40066	2.77778	66.6667	0.0833612	1.29721e-05	0.000157019	0.000435158	30.5556	53.3333	60	chr6q25.3	0007016 // cytoskeletal anchoring at plasma membrane // non-traceable author statement /// 0007159 // leukocyte cell-cell adhesion // inferred from expression pattern /// 0008360 // regulation of cell shape // inferred from electronic annotation /// 00226	0001726 // ruffle // inferred from direct assay /// 0001931 // uropod // inferred from electronic annotation /// 0005737 // cytoplasm // inferred from electronic annotation /// 0005829 // cytosol // not recorded /// 0005829 // cytosol // inferred from dir	0005488 // binding // inferred from electronic annotation /// 0005515 // protein binding // inferred from physical interaction /// 0005515 // protein binding // inferred from electronic annotation /// 0008092 // cytoskeletal protein binding // inferred fr	---
208622_s_at	ezrin	EZR	262.35	268.7	70.5957	100	359.333	346.95	59.599	100	-0.633333	-1.55114	0	61.1111	0.0457503	1.97528e-07	0.000107961	2.73687e-07	38.8889	40	66.6667	chr6q25.3	0007016 // cytoskeletal anchoring at plasma membrane // non-traceable author statement /// 0007159 // leukocyte cell-cell adhesion // inferred from expression pattern /// 0008360 // regulation of cell shape // inferred from electronic annotation /// 00226	0001726 // ruffle // inferred from direct assay /// 0001931 // uropod // inferred from electronic annotation /// 0005737 // cytoplasm // inferred from electronic annotation /// 0005829 // cytosol // not recorded /// 0005829 // cytosol // inferred from dir	0005488 // binding // inferred from electronic annotation /// 0005515 // protein binding // inferred from physical interaction /// 0005515 // protein binding // inferred from electronic annotation /// 0008092 // cytoskeletal protein binding // inferred fr	---
204714_s_at	coagulation factor V (proaccelerin, labile factor)	F5	1256.78	1074.3	455.783	100	718.683	771.7	175.607	100	0.7	1.6245	72.2222	0	0.0124656	1.37368e-07	2.39706e-05	1.1896e-06	27.7778	66.6667	66.6667	chr1q23	0007155 // cell adhesion // inferred from electronic annotation /// 0007596 // blood coagulation // inferred from electronic annotation /// 0007596 // blood coagulation // traceable author statement /// 0008015 // blood circulation // inferred from electr	0005576 // extracellular region // not recorded /// 0005576 // extracellular region // non-traceable author statement /// 0005576 // extracellular region // inferred from electronic annotation /// 0005615 // extracellular space // inferred from electronic	0005507 // copper ion binding // inferred from electronic annotation /// 0016491 // oxidoreductase activity // inferred from electronic annotation /// 0046872 // metal ion binding // inferred from electronic annotation	Blood_Clotting_Cascade // GenMAPP
204713_s_at	coagulation factor V (proaccelerin, labile factor)	F5	1165.22	883.2	628.271	100	674.233	571.65	245.901	100	0.611111	1.52744	69.4444	2.77778	0.0796337	0.000181455	0.0036685	0.000644591	27.7778	40	26.6667	chr1q23	0007155 // cell adhesion // inferred from electronic annotation /// 0007596 // blood coagulation // inferred from electronic annotation /// 0007596 // blood coagulation // traceable author statement /// 0008015 // blood circulation // inferred from electr	0005576 // extracellular region // not recorded /// 0005576 // extracellular region // non-traceable author statement /// 0005576 // extracellular region // inferred from electronic annotation /// 0005615 // extracellular space // inferred from electronic	0005507 // copper ion binding // inferred from electronic annotation /// 0016491 // oxidoreductase activity // inferred from electronic annotation /// 0046872 // metal ion binding // inferred from electronic annotation	Blood_Clotting_Cascade // GenMAPP
231029_at	coagulation factor V (proaccelerin, labile factor)	F5	299.55	291.2	88.9952	100	193.817	179.05	82.9837	100	0.666667	1.5874	66.6667	2.77778	0.0651761	3.58958e-05	0.000144316	0.00147624	30.5556	26.6667	33.3333	chr1q23	0007155 // cell adhesion // inferred from electronic annotation /// 0007596 // blood coagulation // inferred from electronic annotation /// 0007596 // blood coagulation // traceable author statement /// 0008015 // blood circulation // inferred from electr	0005576 // extracellular region // not recorded /// 0005576 // extracellular region // non-traceable author statement /// 0005576 // extracellular region // inferred from electronic annotation /// 0005615 // extracellular space // inferred from electronic	0005507 // copper ion binding // inferred from electronic annotation /// 0016491 // oxidoreductase activity // inferred from electronic annotation /// 0046872 // metal ion binding // inferred from electronic annotation	Blood_Clotting_Cascade // GenMAPP
202535_at	Fas (TNFRSF6)-associated via death domain	FADD	235.317	241.45	47.959	100	164.483	151.15	66.8798	100	0.580556	1.49542	69.4444	8.33333	0.0620204	1.82402e-06	5.79774e-05	6.09782e-05	22.2222	60	53.3333	chr11q13.3	0006915 // apoptosis // inferred from electronic annotation /// 0007165 // signal transduction // inferred from electronic annotation /// 0008624 // induction of apoptosis by extracellular signals // not recorded /// 0008624 // induction of apoptosis by e	0005829 // cytosol // not recorded /// 0031264 // death-inducing signaling complex // inferred from direct assay /// 0043234 // protein complex // inferred from electronic annotation /// 0045121 // membrane raft // inferred from electronic annotation	0005123 // death receptor binding // traceable author statement /// 0005515 // protein binding // inferred from physical interaction /// 0005515 // protein binding // inferred from electronic annotation /// 0042802 // identical protein binding // inferred	Apoptosis // GenMAPP /// Apoptosis_GenMAPP // GenMAPP /// Apoptosis_KEGG // GenMAPP
226431_at	family with sequence similarity 117, member B	FAM117B	1129.2	1162.85	460.614	100	630.85	620.85	185.472	100	0.716667	1.64338	69.4444	11.1111	0.0651966	9.51093e-05	0.00283748	0.000251624	19.4444	26.6667	20	chr2q33.2	---	---	---	---
202771_at	family with sequence similarity 38, member A	FAM38A	519.15	520.95	114.514	100	826.467	913.25	201.165	100	-0.505556	-1.41967	2.77778	66.6667	0.030691	3.96358e-08	2.04075e-07	3.51991e-05	30.5556	66.6667	66.6667	chr16q24.3	---	0005783 // endoplasmic reticulum // inferred from electronic annotation /// 0005789 // endoplasmic reticulum membrane // inferred from electronic annotation /// 0016020 // membrane // inferred from electronic annotation /// 0016021 // integral to membrane	---	---
209829_at	family with sequence similarity 65, member B	FAM65B	2578.48	2629.25	466.781	100	1708.88	1591.95	482.346	100	0.544444	1.45846	69.4444	2.77778	0.0196717	2.35321e-09	4.17607e-09	9.05892e-06	27.7778	80	40	chr6p22.3-p21.32	0007275 // multicellular organismal development // inferred from electronic annotation /// 0007517 // muscle organ development // inferred from electronic annotation /// 0030154 // cell differentiation // inferred from electronic annotation	0005737 // cytoplasm // inferred from electronic annotation /// 0005739 // mitochondrion // inferred from electronic annotation /// 0005856 // cytoskeleton // inferred from electronic annotation /// 0030175 // filopodium // inferred from electronic annota	0005488 // binding // inferred from electronic annotation	---
226448_at	family with sequence similarity 89, member A	FAM89A	154.683	170.55	65.5545	100	67.1	67.35	20.7787	100	0.963889	1.95056	72.2222	5.55556	0.0277941	3.327e-06	0.000957367	1.8584e-06	22.2222	20	73.3333	chr1q42.2	---	---	---	---
226970_at	F-box protein 33	FBXO33	362.417	365.95	28.7532	100	469.2	460.25	75.3828	100	-0.380556	-1.30184	0	61.1111	0.0160106	4.67803e-08	5.30753e-08	3.01887e-05	38.8889	100	60	chr14q21.1	---	---	---	---
224856_at	FK506 binding protein 5	FKBP5	2104.18	1222.4	1604.8	100	653.167	684.15	167.911	100	1.26111	2.3968	83.3333	11.1111	0.0549978	3.3383e-06	0.00109232	5.33967e-07	5.55556	20	60	chr6p21.31	0006457 // protein folding // inferred from electronic annotation /// 0006457 // protein folding // traceable author statement	0005634 // nucleus // inferred from electronic annotation /// 0005737 // cytoplasm // inferred from electronic annotation	0003755 // peptidyl-prolyl cis-trans isomerase activity // inferred from electronic annotation /// 0005488 // binding // inferred from electronic annotation /// 0005515 // protein binding // inferred from physical interaction /// 0005515 // protein bindin	---
204560_at	FK506 binding protein 5	FKBP5	149.017	89.5	124.073	83.3333	31.2833	29.5	19.112	33.3333	1.85278	3.61195	77.7778	0	0.0313414	5.74153e-07	4.33589e-05	2.44971e-05	22.2222	26.6667	66.6667	chr6p21.31	0006457 // protein folding // inferred from electronic annotation /// 0006457 // protein folding // traceable author statement	0005634 // nucleus // inferred from electronic annotation /// 0005737 // cytoplasm // inferred from electronic annotation	0003755 // peptidyl-prolyl cis-trans isomerase activity // inferred from electronic annotation /// 0005488 // binding // inferred from electronic annotation /// 0005515 // protein binding // inferred from physical interaction /// 0005515 // protein bindin	---
224840_at	FK506 binding protein 5	FKBP5	5705.43	3869.1	3821.43	100	2297.17	2485.05	403.053	100	0.997222	1.99615	77.7778	11.1111	0.0652018	1.20151e-05	0.00233563	1.55767e-06	11.1111	13.3333	66.6667	chr6p21.31	0006457 // protein folding // inferred from electronic annotation /// 0006457 // protein folding // traceable author statement	0005634 // nucleus // inferred from electronic annotation /// 0005737 // cytoplasm // inferred from electronic annotation	0003755 // peptidyl-prolyl cis-trans isomerase activity // inferred from electronic annotation /// 0005488 // binding // inferred from electronic annotation /// 0005515 // protein binding // inferred from physical interaction /// 0005515 // protein bindin	---
225032_at	fibronectin type III domain containing 3B	FNDC3B	1393.67	1368.1	115.979	100	1074.83	1102.1	112.901	100	0.333333	1.25992	69.4444	0	0.00192725	1.11673e-10	6.19388e-08	8.5815e-09	30.5556	100	93.3333	chr3q26.31	0045600 // positive regulation of fat cell differentiation // inferred from electronic annotation	0005783 // endoplasmic reticulum // inferred from direct assay /// 0016020 // membrane // inferred from electronic annotation /// 0016021 // integral to membrane // inferred from electronic annotation	---	---
222692_s_at	fibronectin type III domain containing 3B	FNDC3B	114.5	110.55	24.6049	100	76.7	74.25	15.6879	83.3333	0.727778	1.65609	66.6667	0	0.0182297	1.42864e-10	1.198e-07	4.73265e-08	33.3333	66.6667	80	chr3q26.31	0045600 // positive regulation of fat cell differentiation // inferred from electronic annotation	0005783 // endoplasmic reticulum // inferred from direct assay /// 0016020 // membrane // inferred from electronic annotation /// 0016021 // integral to membrane // inferred from electronic annotation	---	---
202768_at	FBJ murine osteosarcoma viral oncogene homolog B	FOSB	328.317	231.9	285.533	66.6667	628.05	667.9	435.92	100	-1.1	-2.14355	22.2222	63.8889	0.257156	0.0362306	0.100479	0.05986	13.8889	20	20	chr19q13.32	0000122 // negative regulation of transcription from RNA polymerase II promoter // traceable author statement /// 0006355 // regulation of transcription, DNA-dependent // inferred from electronic annotation /// 0007275 // multicellular organismal developm	0005634 // nucleus // inferred from electronic annotation	0003677 // DNA binding // traceable author statement /// 0003677 // DNA binding // inferred from electronic annotation /// 0003700 // sequence-specific DNA binding transcription factor activity // inferred from electronic annotation /// 0008134 // transcr	---
202723_s_at	forkhead box O1	FOXO1	128.85	129.45	11.014	100	201.433	199.4	35.1333	100	-0.652778	-1.57219	0	69.4444	0.00184111	1.72857e-13	1.20597e-07	9.31247e-14	30.5556	53.3333	100	chr13q14.1	0001568 // blood vessel development // inferred from sequence or structural similarity /// 0001568 // blood vessel development // inferred from electronic annotation /// 0006350 // transcription // inferred from electronic annotation /// 0006355 // regula	0005634 // nucleus // inferred from direct assay /// 0005634 // nucleus // inferred from electronic annotation /// 0005654 // nucleoplasm // not recorded /// 0005667 // transcription factor complex // inferred from sequence or structural similarity /// 00	0003677 // DNA binding // inferred from electronic annotation /// 0003690 // double-stranded DNA binding // inferred from sequence or structural similarity /// 0003700 // sequence-specific DNA binding transcription factor activity // inferred from sequenc	---
205118_at	formyl peptide receptor 1	FPR1	213.6	195.6	73.0514	100	119.65	113.55	52.9672	83.3333	0.866667	1.82344	61.1111	2.77778	0.0330736	2.79357e-06	3.00586e-05	0.000163092	36.1111	46.6667	46.6667	chr19q13.4	0000187 // activation of MAPK activity // traceable author statement /// 0006928 // cellular component movement // traceable author statement /// 0006935 // chemotaxis // inferred from electronic annotation /// 0006935 // chemotaxis // traceable author st	0005768 // endosome // traceable author statement /// 0005886 // plasma membrane // not recorded /// 0005886 // plasma membrane // inferred from electronic annotation /// 0005886 // plasma membrane // traceable author statement /// 0016020 // membrane //	0004871 // signal transducer activity // inferred from electronic annotation /// 0004872 // receptor activity // inferred from electronic annotation /// 0004872 // receptor activity // traceable author statement /// 0004930 // G-protein coupled receptor a	GPCRDB_Class_A_Rhodopsin-like // GenMAPP /// Peptide_GPCRs // GenMAPP
210772_at	formyl peptide receptor 2	FPR2	750.883	774.75	158.816	100	366.65	390.35	74.8643	100	0.911111	1.88049	91.6667	0	0.000599168	3.63498e-16	1.63301e-12	1.32011e-11	8.33333	60	60	chr19q13.3-q13.4	0006928 // cellular component movement // traceable author statement /// 0006935 // chemotaxis // inferred from electronic annotation /// 0006935 // chemotaxis // traceable author statement /// 0006954 // inflammatory response // traceable author statemen	0005886 // plasma membrane // not recorded /// 0005886 // plasma membrane // inferred from electronic annotation /// 0005886 // plasma membrane // traceable author statement /// 0016020 // membrane // inferred from electronic annotation /// 0016021 // int	0004871 // signal transducer activity // inferred from electronic annotation /// 0004872 // receptor activity // inferred from electronic annotation /// 0004930 // G-protein coupled receptor activity // inferred from electronic annotation /// 0004930 // G	GPCRDB_Class_A_Rhodopsin-like // GenMAPP /// Peptide_GPCRs // GenMAPP
210773_s_at	formyl peptide receptor 2	FPR2	359.517	349.45	97.5976	100	182.05	165.55	35.6256	100	0.991667	1.98848	77.7778	0	0.00287338	2.72255e-19	1.89141e-11	8.09337e-17	22.2222	53.3333	73.3333	chr19q13.3-q13.4	0006928 // cellular component movement // traceable author statement /// 0006935 // chemotaxis // inferred from electronic annotation /// 0006935 // chemotaxis // traceable author statement /// 0006954 // inflammatory response // traceable author statemen	0005886 // plasma membrane // not recorded /// 0005886 // plasma membrane // inferred from electronic annotation /// 0005886 // plasma membrane // traceable author statement /// 0016020 // membrane // inferred from electronic annotation /// 0016021 // int	0004871 // signal transducer activity // inferred from electronic annotation /// 0004872 // receptor activity // inferred from electronic annotation /// 0004930 // G-protein coupled receptor activity // inferred from electronic annotation /// 0004930 // G	GPCRDB_Class_A_Rhodopsin-like // GenMAPP /// Peptide_GPCRs // GenMAPP
219889_at	frequently rearranged in advanced T-cell lymphomas	FRAT1	1027.93	1017.55	173.927	100	727.417	732	121.935	100	0.5	1.41421	72.2222	0	0.0075412	3.97114e-10	2.42797e-08	5.31538e-07	27.7778	66.6667	53.3333	chr10q24.1	0000578 // embryonic axis specification // inferred from electronic annotation /// 0016055 // Wnt receptor signaling pathway // inferred from electronic annotation	0005737 // cytoplasm // inferred from electronic annotation	---	Wnt_signaling // GenMAPP
209864_at	frequently rearranged in advanced T-cell lymphomas 2	FRAT2	1496.52	1524.75	310.696	100	1066.92	1040.75	210.702	100	0.538889	1.45285	66.6667	2.77778	0.0347843	1.59435e-07	8.87579e-06	1.24988e-05	30.5556	46.6667	40	chr10q24.1	0007275 // multicellular organismal development // non-traceable author statement /// 0008283 // cell proliferation // non-traceable author statement /// 0016055 // Wnt receptor signaling pathway // inferred from electronic annotation	---	---	---
213524_s_at	G0/G1switch 2	G0S2	164.717	171.75	77.4438	100	540.167	237.4	549.726	100	-1.48611	-2.80133	11.1111	66.6667	0.123347	0.000219618	0.000456247	0.00497301	22.2222	20	6.66667	chr1q32.2	0007049 // cell cycle // inferred from electronic annotation	---	---	Circadian_Exercise // GenMAPP
203725_at	growth arrest and DNA-damage-inducible, alpha	GADD45A	348.733	273.1	140.283	100	176.367	171.7	69.2429	100	0.980556	1.97323	69.4444	0	0.016574	2.41686e-07	1.16059e-05	1.61101e-05	30.5556	46.6667	33.3333	chr1p31.2	0000079 // regulation of cyclin-dependent protein kinase activity // traceable author statement /// 0000086 // G2/M transition of mitotic cell cycle // inferred from electronic annotation /// 0006281 // DNA repair // traceable author statement /// 0006469	0005634 // nucleus // inferred from direct assay /// 0005634 // nucleus // traceable author statement	0005515 // protein binding // inferred from physical interaction /// 0005515 // protein binding // inferred from electronic annotation	Cell_cycle_KEGG // GenMAPP /// G1_to_S_cell_cycle_Reactome // GenMAPP
1552386_at	GRB2-binding adaptor protein, transmembrane	GAPT	1896.9	1997.35	264.78	100	1368.58	1380.3	209.752	100	0.480556	1.39528	63.8889	0	0.00767387	4.11552e-10	1.9767e-07	2.47398e-08	36.1111	73.3333	60	chr5q11.2	0042113 // B cell activation // inferred from electronic annotation	0005886 // plasma membrane // inferred from electronic annotation /// 0016020 // membrane // inferred from electronic annotation /// 0016021 // integral to membrane // inferred from electronic annotation	---	---
31874_at	growth arrest-specific 2 like 1	GAS2L1	369.633	372.05	100.231	100	559.817	554.1	73.605	100	-0.694444	-1.61826	0	75	0.0257032	4.94857e-09	3.55867e-05	6.95641e-10	25	53.3333	66.6667	chr22q12.2	0007050 // cell cycle arrest // inferred from electronic annotation	0005737 // cytoplasm // inferred from electronic annotation /// 0005856 // cytoskeleton // inferred from electronic annotation	---	---
224741_x_at	growth arrest-specific 5 (non-protein coding)	GAS5	1487.52	1522.75	246.296	100	1964.37	2197.95	767.702	100	-0.305556	-1.23589	27.7778	63.8889	0.400071	0.068624	0.0505114	0.197926	8.33333	40	26.6667	chr1q25.1	---	0000775 // chromosome, centromeric region // inferred from electronic annotation /// 0005634 // nucleus // inferred from electronic annotation	---	---
224841_x_at	growth arrest-specific 5 (non-protein coding)	GAS5	1558.22	1720.45	301.871	100	2005.02	2160.05	841.867	100	-0.302778	-1.23352	27.7778	61.1111	0.48594	0.0755444	0.0606154	0.203391	11.1111	40	26.6667	chr1q25.1	---	0000775 // chromosome, centromeric region // inferred from electronic annotation /// 0005634 // nucleus // inferred from electronic annotation	---	---
228376_at	glycoprotein, alpha-galactosyltransferase 1 pseudogene	GGTA1	584.033	550.75	243.862	100	995.383	990.25	175.91	100	-0.738889	-1.66889	2.77778	69.4444	0.0231972	4.66352e-07	0.000275643	3.53205e-07	27.7778	33.3333	73.3333	chr9q33.2	0005975 // carbohydrate metabolic process // inferred from electronic annotation	0005794 // Golgi apparatus // inferred from electronic annotation /// 0016020 // membrane // inferred from electronic annotation /// 0016021 // integral to membrane // inferred from electronic annotation /// 0032580 // Golgi cisterna membrane // inferred	0016758 // transferase activity, transferring hexosyl groups // inferred from electronic annotation	---
1552316_a_at	GTPase, IMAP family member 1	GIMAP1	2195.88	1972.95	664.118	100	1562.92	1300.35	597.661	100	0.480556	1.39528	72.2222	11.1111	0.0924871	3.71971e-05	7.53903e-05	0.00182365	16.6667	46.6667	53.3333	chr7q36.1	---	0005783 // endoplasmic reticulum // inferred from electronic annotation /// 0005789 // endoplasmic reticulum membrane // inferred from electronic annotation /// 0016020 // membrane // inferred from electronic annotation /// 0016021 // integral to membrane	0005525 // GTP binding // inferred from electronic annotation	---
1552315_at	GTPase, IMAP family member 1	GIMAP1	606.067	579.1	124.221	100	425.25	396.9	139.173	100	0.477778	1.3926	63.8889	8.33333	0.0396909	3.19087e-05	8.14615e-05	0.00175542	27.7778	53.3333	40	chr7q36.1	---	0005783 // endoplasmic reticulum // inferred from electronic annotation /// 0005789 // endoplasmic reticulum membrane // inferred from electronic annotation /// 0016020 // membrane // inferred from electronic annotation /// 0016021 // integral to membrane	0005525 // GTP binding // inferred from electronic annotation	---
218805_at	GTPase, IMAP family member 5	GIMAP5	536.517	518.1	141.889	100	334.133	266.3	203.831	100	0.811111	1.75456	75	8.33333	0.0566592	6.8205e-06	2.04132e-05	0.000632849	16.6667	40	33.3333	chr7q36.1	0001659 // temperature homeostasis // inferred from electronic annotation /// 0002729 // positive regulation of natural killer cell cytokine production // inferred from electronic annotation /// 0002925 // positive regulation of humoral immune response me	0005739 // mitochondrion // inferred from electronic annotation /// 0005741 // mitochondrial outer membrane // inferred from electronic annotation /// 0016020 // membrane // inferred from electronic annotation /// 0016021 // integral to membrane // inferr	0000166 // nucleotide binding // inferred from electronic annotation /// 0005525 // GTP binding // inferred from electronic annotation	---
64064_at	GTPase, IMAP family member 5	GIMAP5	535.567	537.25	110.646	100	380.8	322.45	164.965	100	0.644444	1.56314	69.4444	8.33333	0.0670643	1.83638e-05	0.000109749	0.000838275	22.2222	60	60	chr7q36.1	0001659 // temperature homeostasis // inferred from electronic annotation /// 0002729 // positive regulation of natural killer cell cytokine production // inferred from electronic annotation /// 0002925 // positive regulation of humoral immune response me	0005739 // mitochondrion // inferred from electronic annotation /// 0005741 // mitochondrial outer membrane // inferred from electronic annotation /// 0016020 // membrane // inferred from electronic annotation /// 0016021 // integral to membrane // inferr	0000166 // nucleotide binding // inferred from electronic annotation /// 0005525 // GTP binding // inferred from electronic annotation	---
219777_at	GTPase, IMAP family member 6	GIMAP6	2138.75	2189.3	366.143	100	1575.17	1365.1	568.833	100	0.491667	1.40607	66.6667	8.33333	0.0672698	1.82284e-05	4.23838e-05	0.00125781	25	46.6667	33.3333	---	---	---	0000166 // nucleotide binding // inferred from electronic annotation /// 0005525 // GTP binding // inferred from electronic annotation	---
229367_s_at	GTPase, IMAP family member 6	GIMAP6	1245.93	1318.1	203.56	100	952.283	854.75	246.713	100	0.408333	1.32715	66.6667	5.55556	0.0528833	7.23926e-05	0.000209093	0.00193582	27.7778	46.6667	46.6667	---	---	---	0000166 // nucleotide binding // inferred from electronic annotation /// 0005525 // GTP binding // inferred from electronic annotation	---
228071_at	GTPase, IMAP family member 7	GIMAP7	2519.53	2580.7	818.653	100	1674.37	1486.95	1053.39	100	0.8	1.7411	69.4444	13.8889	0.114741	0.000205208	0.000170158	0.00667423	16.6667	26.6667	20	chr7q36.1	---	---	0000166 // nucleotide binding // inferred from electronic annotation /// 0005525 // GTP binding // inferred from electronic annotation	---
235306_at	GTPase, IMAP family member 8	GIMAP8	2382.25	2103.55	757.106	100	1512.02	1296.55	697.843	100	0.638889	1.55713	75	11.1111	0.059789	0.000100026	0.000327012	0.00254927	13.8889	33.3333	20	chr7q36.1	---	0005739 // mitochondrion // inferred from electronic annotation /// 0005783 // endoplasmic reticulum // inferred from electronic annotation /// 0005794 // Golgi apparatus // inferred from electronic annotation	0000166 // nucleotide binding // inferred from electronic annotation /// 0005525 // GTP binding // inferred from electronic annotation	---
207387_s_at	glycerol kinase	GK	234.133	226.25	37.0634	100	158.467	149.8	37.2445	100	0.516667	1.43065	63.8889	0	0.010139	4.12858e-12	1.87124e-09	9.36452e-09	36.1111	93.3333	80	chrXp21.3	0005975 // carbohydrate metabolic process // inferred from electronic annotation /// 0006071 // glycerol metabolic process // non-traceable author statement /// 0006071 // glycerol metabolic process // inferred from electronic annotation /// 0006072 // gl	0005737 // cytoplasm // non-traceable author statement /// 0005737 // cytoplasm // inferred from electronic annotation /// 0005739 // mitochondrion // inferred from electronic annotation /// 0005741 // mitochondrial outer membrane // non-traceable author	0000166 // nucleotide binding // inferred from electronic annotation /// 0004370 // glycerol kinase activity // not recorded /// 0004370 // glycerol kinase activity // non-traceable author statement /// 0004370 // glycerol kinase activity // inferred from	---
212335_at	glucosamine (N-acetyl)-6-sulfatase	GNS	1574.43	1647.4	227.725	100	1365.05	1316.85	172.179	100	0.211111	1.15758	61.1111	8.33333	0.159388	0.00339128	0.0272184	0.00516414	30.5556	60	73.3333	chr12q14	0006027 // glycosaminoglycan catabolic process // traceable author statement /// 0008152 // metabolic process // inferred from electronic annotation /// 0030203 // glycosaminoglycan metabolic process // inferred from electronic annotation /// 0042340 // k	0005764 // lysosome // inferred from electronic annotation	0003824 // catalytic activity // inferred from electronic annotation /// 0005515 // protein binding // inferred from physical interaction /// 0005539 // glycosaminoglycan binding // inferred from electronic annotation /// 0008449 // N-acetylglucosamine-6-	---
223423_at	G protein-coupled receptor 160	GPR160	856.217	811.35	160.207	100	478.317	517.45	85.0854	100	0.738889	1.66889	80.5556	0	0.000648967	2.19973e-12	2.14913e-11	1.43428e-07	19.4444	46.6667	46.6667	chr3q26.2-q27	0007165 // signal transduction // inferred from electronic annotation /// 0007186 // G-protein coupled receptor protein signaling pathway // inferred from electronic annotation	0005886 // plasma membrane // inferred from electronic annotation /// 0016020 // membrane // inferred from electronic annotation /// 0016021 // integral to membrane // inferred from electronic annotation	0004871 // signal transducer activity // inferred from electronic annotation /// 0004872 // receptor activity // inferred from electronic annotation /// 0004930 // G-protein coupled receptor activity // inferred from electronic annotation	---
203974_at	haloacid dehalogenase-like hydrolase domain containing 1	HDHD1	781.483	779.4	157.533	100	578.083	585.15	140.201	100	0.486111	1.40066	63.8889	2.77778	0.0668241	4.57454e-06	0.000103328	0.000169948	33.3333	46.6667	33.3333	chrXp22.32	0008152 // metabolic process // inferred from electronic annotation	---	0003824 // catalytic activity // inferred from electronic annotation /// 0016787 // hydrolase activity // inferred from electronic annotation	---
212966_at	hypermethylated in cancer 2	HIC2	115.117	108.9	31.2626	100	199.867	204.35	59.2005	100	-0.658333	-1.57826	2.77778	66.6667	0.0203392	2.98507e-05	0.000127279	0.00148869	30.5556	66.6667	33.3333	chr22q11.21	0006350 // transcription // inferred from electronic annotation /// 0045449 // regulation of transcription // inferred from electronic annotation /// 0045892 // negative regulation of transcription, DNA-dependent // non-traceable author statement	0005622 // intracellular // inferred from electronic annotation /// 0005634 // nucleus // inferred from direct assay /// 0005634 // nucleus // inferred from electronic annotation	0003676 // nucleic acid binding // inferred from electronic annotation /// 0003677 // DNA binding // non-traceable author statement /// 0003677 // DNA binding // inferred from electronic annotation /// 0005515 // protein binding // inferred from electroni	---
235122_at	human immunodeficiency virus type I enhancer binding protein 3	HIVEP3	193.283	190.7	56.6149	100	339.683	321.65	135.199	100	-0.630556	-1.54816	2.77778	66.6667	0.0465144	8.1338e-05	0.000316395	0.00210595	30.5556	33.3333	13.3333	chr1p34	0006350 // transcription // inferred from electronic annotation /// 0045449 // regulation of transcription // inferred from electronic annotation /// 0045941 // positive regulation of transcription // inferred from direct assay	0005622 // intracellular // inferred from electronic annotation /// 0005634 // nucleus // inferred from electronic annotation /// 0005737 // cytoplasm // inferred from electronic annotation	0003676 // nucleic acid binding // inferred from electronic annotation /// 0003677 // DNA binding // inferred from electronic annotation /// 0008270 // zinc ion binding // inferred from electronic annotation /// 0016563 // transcription activator activity	---
211991_s_at	major histocompatibility complex, class II, DP alpha 1	HLA-DPA1	3941.75	3621.3	790.995	100	4865.4	4775.9	609.434	100	-0.369444	-1.29186	5.55556	63.8889	0.0491988	2.76201e-05	0.000999548	0.000129995	30.5556	40	40	chr6p21.3	0002504 // antigen processing and presentation of peptide or polysaccharide antigen via MHC class II // inferred from electronic annotation /// 0006955 // immune response // non-traceable author statement /// 0006955 // immune response // inferred from el	0005764 // lysosome // inferred from electronic annotation /// 0005765 // lysosomal membrane // inferred from electronic annotation /// 0005768 // endosome // inferred from electronic annotation /// 0005783 // endoplasmic reticulum // inferred from electr	0032395 // MHC class II receptor activity // non-traceable author statement	---
236203_at	major histocompatibility complex, class II, DQ alpha 1	HLA-DQA1	182.45	179.25	109.407	100	446.133	404.1	271.735	100	-1.36944	-2.58371	5.55556	72.2222	0.0629704	0.000100143	0.00370817	0.000164042	22.2222	20	33.3333	chr6p21.3	0002504 // antigen processing and presentation of peptide or polysaccharide antigen via MHC class II // inferred from electronic annotation /// 0006955 // immune response // non-traceable author statement /// 0006955 // immune response // inferred from el	0005764 // lysosome // inferred from electronic annotation /// 0005765 // lysosomal membrane // inferred from electronic annotation /// 0005768 // endosome // inferred from electronic annotation /// 0005783 // endoplasmic reticulum // inferred from electr	0032395 // MHC class II receptor activity // non-traceable author statement /// 0032395 // MHC class II receptor activity // traceable author statement	---
212671_s_at	major histocompatibility complex, class II, DQ alpha 1 /// major histocompatibility complex, class II, DQ alpha 2	HLA-DQA1 /// HLA-DQA2	1301.43	1233.6	603.533	100	3583.23	3516.6	1082.63	100	-1.475	-2.77984	2.77778	94.4444	0.00314131	1.85679e-11	1.49258e-07	7.63147e-10	2.77778	13.3333	40	chr6p21.3	0002504 // antigen processing and presentation of peptide or polysaccharide antigen via MHC class II // inferred from electronic annotation /// 0006955 // immune response // non-traceable author statement /// 0006955 // immune response // inferred from el	0005764 // lysosome // inferred from electronic annotation /// 0005765 // lysosomal membrane // inferred from electronic annotation /// 0005768 // endosome // inferred from electronic annotation /// 0005783 // endoplasmic reticulum // inferred from electr	0032395 // MHC class II receptor activity // non-traceable author statement /// 0032395 // MHC class II receptor activity // traceable author statement	---
208808_s_at	high-mobility group box 2	HMGB2	8022.27	7762	1995.2	100	5457.02	5549.6	656.931	100	0.477778	1.3926	72.2222	0	0.0140381	8.48877e-09	3.47079e-05	7.21166e-09	27.7778	60	80	chr4q31	0001938 // positive regulation of endothelial cell proliferation // inferred from direct assay /// 0006265 // DNA topological change // inferred from sequence or structural similarity /// 0006288 // base-excision repair, DNA ligation // inferred from dire	0000793 // condensed chromosome // inferred from direct assay /// 0005615 // extracellular space // inferred from direct assay /// 0005634 // nucleus // inferred from direct assay /// 0005634 // nucleus // inferred from electronic annotation /// 0005654 /	0003677 // DNA binding // inferred from mutant phenotype /// 0003677 // DNA binding // inferred from electronic annotation /// 0003684 // damaged DNA binding // inferred from direct assay /// 0003690 // double-stranded DNA binding // inferred from sequenc	---
206697_s_at	haptoglobin	HP	741.15	462.1	750.727	100	216.217	187	80.5819	100	1.21667	2.32409	75	5.55556	0.0452484	1.90466e-05	0.00191298	7.79619e-06	19.4444	13.3333	26.6667	chr16q22.1	0006508 // proteolysis // inferred from electronic annotation /// 0006879 // cellular iron ion homeostasis // non-traceable author statement /// 0006952 // defense response // traceable author statement	0005576 // extracellular region // non-traceable author statement /// 0005576 // extracellular region // inferred from electronic annotation	0003824 // catalytic activity // inferred from electronic annotation /// 0004252 // serine-type endopeptidase activity // inferred from electronic annotation /// 0030492 // hemoglobin binding // inferred from electronic annotation	---
208470_s_at	haptoglobin /// haptoglobin-related protein	HP /// HPR	585.15	389.55	585.748	100	151.917	104.1	130.939	100	1.51667	2.86129	75	2.77778	0.035632	4.14088e-06	0.000649021	5.22519e-06	22.2222	13.3333	33.3333	chr16q22.1	0006508 // proteolysis // inferred from electronic annotation /// 0006879 // cellular iron ion homeostasis // non-traceable author statement /// 0006952 // defense response // traceable author statement	0005576 // extracellular region // non-traceable author statement /// 0005576 // extracellular region // inferred from electronic annotation /// 0034366 // spherical high-density lipoprotein particle // inferred from direct assay	0003824 // catalytic activity // inferred from electronic annotation /// 0004252 // serine-type endopeptidase activity // inferred from electronic annotation /// 0030492 // hemoglobin binding // inferred from electronic annotation /// 0030492 // hemoglobi	---
204683_at	intercellular adhesion molecule 2	ICAM2	355.667	346.3	73.475	100	469.717	497.05	108.067	100	-0.419444	-1.33741	8.33333	61.1111	0.0847386	0.00024525	0.00173248	0.00309546	30.5556	33.3333	33.3333	chr17q23-q25	0007155 // cell adhesion // inferred from electronic annotation /// 0016337 // cell-cell adhesion // inferred from electronic annotation	0001931 // uropod // inferred from electronic annotation /// 0005886 // plasma membrane // not recorded /// 0005886 // plasma membrane // traceable author statement /// 0005887 // integral to plasma membrane // inferred from electronic annotation /// 0005	0005178 // integrin binding // inferred from physical interaction /// 0005178 // integrin binding // traceable author statement /// 0005515 // protein binding // inferred from electronic annotation	---
213620_s_at	intercellular adhesion molecule 2	ICAM2	762.8	615.6	241.898	100	1030.27	976.7	184.879	100	-0.402778	-1.32205	2.77778	61.1111	0.0606719	8.07592e-07	6.74436e-05	2.70965e-05	36.1111	46.6667	40	chr17q23-q25	0007155 // cell adhesion // inferred from electronic annotation /// 0016337 // cell-cell adhesion // inferred from electronic annotation	0001931 // uropod // inferred from electronic annotation /// 0005886 // plasma membrane // not recorded /// 0005886 // plasma membrane // traceable author statement /// 0005887 // integral to plasma membrane // inferred from electronic annotation /// 0005	0005178 // integrin binding // inferred from physical interaction /// 0005178 // integrin binding // traceable author statement /// 0005515 // protein binding // inferred from electronic annotation	---
207194_s_at	intercellular adhesion molecule 4 (Landsteiner-Wiener blood group)	ICAM4	31.1333	26.8	15.626	50	85.9667	78.8	50.0019	100	-1.15	-2.21914	5.55556	63.8889	0.0272061	2.44964e-06	5.59585e-06	0.000379619	30.5556	66.6667	26.6667	chr19p13.2-cen	0007155 // cell adhesion // inferred from electronic annotation /// 0016337 // cell-cell adhesion // inferred from electronic annotation	0005576 // extracellular region // inferred from electronic annotation /// 0005886 // plasma membrane // not recorded /// 0005886 // plasma membrane // inferred from electronic annotation /// 0005886 // plasma membrane // traceable author statement /// 00	0005178 // integrin binding // traceable author statement	---
1555037_a_at	isocitrate dehydrogenase 1 (NADP+), soluble	IDH1	1771.43	1843.05	242.797	100	1330.45	1344.95	213.718	100	0.402778	1.32205	63.8889	0	0.0169962	6.71835e-09	3.17172e-07	2.35394e-06	36.1111	60	46.6667	chr2q33.3	0005975 // carbohydrate metabolic process // traceable author statement /// 0006097 // glyoxylate cycle // inferred from electronic annotation /// 0006099 // tricarboxylic acid cycle // inferred from electronic annotation /// 0006102 // isocitrate metabol	0005737 // cytoplasm // inferred from direct assay /// 0005737 // cytoplasm // inferred from electronic annotation /// 0005739 // mitochondrion // inferred from electronic annotation /// 0005777 // peroxisome // inferred from electronic annotation /// 000	0000287 // magnesium ion binding // inferred from direct assay /// 0000287 // magnesium ion binding // inferred from electronic annotation /// 0004450 // isocitrate dehydrogenase (NADP+) activity // inferred from direct assay /// 0004450 // isocitrate deh	---
226559_at	immediate early response 5-like	IER5L	113.783	106.1	27.6153	66.6667	147.833	154.9	37.4432	83.3333	-0.555556	-1.46973	2.77778	61.1111	0.200979	4.37113e-06	5.26347e-05	0.000145807	36.1111	73.3333	60	chr9q34.11	---	---	---	---
211676_s_at	interferon gamma receptor 1	IFNGR1	2763.9	2825.75	424.539	100	1731.98	1643.8	196.464	100	0.658333	1.57826	91.6667	0	0.000604065	4.49457e-14	1.73204e-09	1.69289e-11	8.33333	46.6667	46.6667	chr6q23.3	0007165 // signal transduction // traceable author statement /// 0007596 // blood coagulation // inferred from electronic annotation /// 0009615 // response to virus // traceable author statement	0005783 // endoplasmic reticulum // inferred from electronic annotation /// 0005887 // integral to plasma membrane // traceable author statement /// 0014069 // postsynaptic density // inferred from electronic annotation /// 0016020 // membrane // inferred	0004872 // receptor activity // inferred from electronic annotation /// 0004906 // interferon-gamma receptor activity // traceable author statement /// 0019955 // cytokine binding // inferred from electronic annotation	---
201393_s_at	insulin-like growth factor 2 receptor	IGF2R	2744.33	2754.15	310.793	100	2098.5	2015.45	405.63	100	0.383333	1.30435	66.6667	0	0.0230689	4.14395e-07	6.51597e-07	0.000134306	33.3333	80	33.3333	chr6q26	0001889 // liver development // inferred from electronic annotation /// 0006810 // transport // inferred from electronic annotation /// 0006898 // receptor-mediated endocytosis // traceable author statement /// 0007165 // signal transduction // traceable	0005615 // extracellular space // inferred from electronic annotation /// 0005624 // membrane fraction // inferred from electronic annotation /// 0005634 // nucleus // inferred from electronic annotation /// 0005641 // nuclear envelope lumen // inferred f	0001948 // glycoprotein binding // inferred from direct assay /// 0001965 // G-protein alpha-subunit binding // inferred from electronic annotation /// 0001972 // retinoic acid binding // inferred from electronic annotation /// 0004872 // receptor activit	---
201392_s_at	insulin-like growth factor 2 receptor	IGF2R	1459.1	1405.05	441.548	100	1030.18	1019.2	247.903	100	0.519444	1.4334	63.8889	0	0.0653054	3.48577e-06	0.000175113	7.12759e-05	36.1111	40	46.6667	chr6q26	0001889 // liver development // inferred from electronic annotation /// 0006810 // transport // inferred from electronic annotation /// 0006898 // receptor-mediated endocytosis // traceable author statement /// 0007165 // signal transduction // traceable	0005615 // extracellular space // inferred from electronic annotation /// 0005624 // membrane fraction // inferred from electronic annotation /// 0005634 // nucleus // inferred from electronic annotation /// 0005641 // nuclear envelope lumen // inferred f	0001948 // glycoprotein binding // inferred from direct assay /// 0001965 // G-protein alpha-subunit binding // inferred from electronic annotation /// 0001972 // retinoic acid binding // inferred from electronic annotation /// 0004872 // receptor activit	---
205039_s_at	IKAROS family zinc finger 1 (Ikaros)	IKZF1	1226.25	1165.75	218.101	100	1689.62	1597.9	261.514	100	-0.480556	-1.39528	0	69.4444	0.0125853	3.77073e-12	2.28049e-07	9.11264e-12	30.5556	73.3333	80	chr7p13-p11.1	0001779 // natural killer cell differentiation // inferred from electronic annotation /// 0006350 // transcription // inferred from electronic annotation /// 0006355 // regulation of transcription, DNA-dependent // inferred from electronic annotation ///	0005622 // intracellular // inferred from electronic annotation /// 0005634 // nucleus // inferred from electronic annotation /// 0005721 // centromeric heterochromatin // inferred from electronic annotation /// 0005737 // cytoplasm // inferred from elect	0003676 // nucleic acid binding // inferred from electronic annotation /// 0003677 // DNA binding // traceable author statement /// 0003677 // DNA binding // inferred from electronic annotation /// 0003700 // sequence-specific DNA binding transcription fa	---
205403_at	interleukin 1 receptor, type II	IL1R2	1428.45	349.05	1637.17	100	125.267	120.6	50.6337	100	2.42222	5.35996	80.5556	2.77778	0.0326271	1.0851e-06	0.000475712	3.73246e-07	16.6667	13.3333	26.6667	chr2q12	0006955 // immune response // traceable author statement	0005886 // plasma membrane // not recorded /// 0016020 // membrane // inferred from electronic annotation /// 0016021 // integral to membrane // inferred from electronic annotation	0004872 // receptor activity // inferred from electronic annotation /// 0004908 // interleukin-1 receptor activity // traceable author statement /// 0004908 // interleukin-1 receptor activity // inferred from electronic annotation /// 0004910 // interleuk	---
211372_s_at	interleukin 1 receptor, type II	IL1R2	801.383	152.65	950.7	100	71.3	75.15	36.3126	83.3333	2.43889	5.42224	77.7778	2.77778	0.0341032	2.93624e-06	0.000593555	2.3029e-06	19.4444	20	33.3333	chr2q12	0006955 // immune response // traceable author statement	0005886 // plasma membrane // not recorded /// 0016020 // membrane // inferred from electronic annotation /// 0016021 // integral to membrane // inferred from electronic annotation	0004872 // receptor activity // inferred from electronic annotation /// 0004908 // interleukin-1 receptor activity // traceable author statement /// 0004908 // interleukin-1 receptor activity // inferred from electronic annotation /// 0004910 // interleuk	---
201626_at	insulin induced gene 1	INSIG1	562.017	576.9	90.2187	100	872.833	844.9	244.803	100	-0.686111	-1.60894	0	75	0.0165974	9.31408e-10	1.10462e-08	3.27767e-06	25	60	40	chr7q36	0006629 // lipid metabolic process // inferred from electronic annotation /// 0006641 // triglyceride metabolic process // inferred from electronic annotation /// 0006695 // cholesterol biosynthetic process // inferred from electronic annotation /// 00069	0005783 // endoplasmic reticulum // inferred from direct assay /// 0005783 // endoplasmic reticulum // inferred from electronic annotation /// 0005789 // endoplasmic reticulum membrane // inferred from electronic annotation /// 0016020 // membrane // infe	0005515 // protein binding // inferred from physical interaction	---
213446_s_at	IQ motif containing GTPase activating protein 1	IQGAP1	750.4	695.45	156.776	100	1043.47	1014.95	133.32	100	-0.502778	-1.41694	0	69.4444	0.0119216	2.79476e-07	6.92501e-05	1.74434e-06	30.5556	40	66.6667	chr15q26.1	0007165 // signal transduction // inferred from electronic annotation /// 0007165 // signal transduction // traceable author statement /// 0007264 // small GTPase mediated signal transduction // inferred from electronic annotation /// 0051056 // regulatio	0005622 // intracellular // inferred from electronic annotation /// 0005634 // nucleus // inferred from direct assay /// 0005730 // nucleolus // inferred from direct assay /// 0005737 // cytoplasm // inferred from direct assay /// 0005737 // cytoplasm //	0005095 // GTPase inhibitor activity // traceable author statement /// 0005096 // GTPase activator activity // traceable author statement /// 0005096 // GTPase activator activity // inferred from electronic annotation /// 0005099 // Ras GTPase activator a	G13_Signaling_Pathway // GenMAPP
213817_at	interleukin-1 receptor-associated kinase 3	IRAK3	2133.02	2097.65	343.888	100	1539.73	1588.6	239.751	100	0.488889	1.40336	77.7778	0	0.0118554	3.48097e-11	1.31031e-08	1.09571e-08	22.2222	80	53.3333	chr12q14.3	0001960 // negative regulation of cytokine-mediated signaling pathway // inferred by curator /// 0002755 // MyD88-dependent toll-like receptor signaling pathway // traceable author statement /// 0006468 // protein phosphorylation // inferred from direct a	0005634 // nucleus // inferred from direct assay /// 0005634 // nucleus // inferred from electronic annotation /// 0005737 // cytoplasm // inferred from direct assay /// 0005737 // cytoplasm // inferred from electronic annotation	0000166 // nucleotide binding // inferred from electronic annotation /// 0000287 // magnesium ion binding // inferred from direct assay /// 0000287 // magnesium ion binding // inferred from electronic annotation /// 0004672 // protein kinase activity // i	---
238725_at	interferon regulatory factor 1	IRF1	863.083	728.2	404.858	100	1170.23	1090.5	287.49	100	-0.533333	-1.44727	13.8889	69.4444	0.107345	0.000893282	0.0142379	0.000838691	16.6667	46.6667	40	chr5q31.1	0006350 // transcription // inferred from electronic annotation /// 0006355 // regulation of transcription, DNA-dependent // inferred from electronic annotation /// 0006366 // transcription from RNA polymerase II promoter // traceable author statement ///	0005634 // nucleus // inferred from electronic annotation	0003677 // DNA binding // inferred from electronic annotation /// 0003700 // sequence-specific DNA binding transcription factor activity // inferred from electronic annotation /// 0043565 // sequence-specific DNA binding // inferred from electronic annota	Apoptosis // GenMAPP
224572_s_at	interferon regulatory factor 2 binding protein 2	IRF2BP2	612.467	610.6	126.769	100	910.167	907.5	253.498	100	-0.497222	-1.41149	2.77778	63.8889	0.0472966	6.12161e-08	3.6894e-07	2.40659e-05	33.3333	73.3333	60	chr1q42.3	0006350 // transcription // inferred from electronic annotation /// 0045449 // regulation of transcription // inferred from electronic annotation	0005634 // nucleus // inferred from electronic annotation	---	---
1554240_a_at	integrin, alpha L (antigen CD11A (p180), lymphocyte function-associated antigen 1; alpha polypeptide)	ITGAL	830.983	807.95	224.274	100	1207.57	1200.15	207.092	100	-0.530556	-1.44449	5.55556	63.8889	0.0254763	1.06444e-06	0.000236431	3.28858e-06	30.5556	33.3333	33.3333	chr16p11.2	0002291 // T cell activation via T cell receptor contact with antigen bound to MHC molecule on antigen presenting cell // inferred from mutant phenotype /// 0006928 // cellular component movement // traceable author statement /// 0006954 // inflammatory r	0005886 // plasma membrane // not recorded /// 0008305 // integrin complex // non-traceable author statement /// 0008305 // integrin complex // inferred from electronic annotation /// 0008305 // integrin complex // traceable author statement /// 0009986 /	0004872 // receptor activity // inferred from electronic annotation /// 0005515 // protein binding // inferred from physical interaction /// 0046982 // protein heterodimerization activity // inferred from electronic annotation /// 0050839 // cell adhesion	Integrin-mediated_cell_adhesion_KEGG // GenMAPP
1552610_a_at	Janus kinase 1	JAK1	205.117	189	68.1641	100	148.55	124.85	55.8363	100	0.394444	1.31444	61.1111	5.55556	0.148631	0.00626024	0.0212084	0.0215227	33.3333	40	40	chr1p32.3-p31.3	0006468 // protein phosphorylation // traceable author statement /// 0006468 // protein phosphorylation // inferred from electronic annotation /// 0007167 // enzyme linked receptor protein signaling pathway // inferred from electronic annotation /// 00072	0005634 // nucleus // inferred from direct assay /// 0005737 // cytoplasm // inferred from direct assay /// 0005829 // cytosol // not recorded /// 0005856 // cytoskeleton // inferred from electronic annotation /// 0012505 // endomembrane system // inferre	0000166 // nucleotide binding // inferred from electronic annotation /// 0004672 // protein kinase activity // inferred from electronic annotation /// 0004713 // protein tyrosine kinase activity // traceable author statement /// 0004713 // protein tyrosin	TGF_Beta_Signaling_Pathway // GenMAPP
228793_at	jumonji domain containing 1C	JMJD1C	614.383	548.25	200.753	100	1194.87	1063.3	796.036	100	-0.558333	-1.47257	22.2222	61.1111	0.363857	0.0526518	0.0245395	0.185263	16.6667	53.3333	6.66667	chr10q21.3	0006350 // transcription // inferred from electronic annotation /// 0006355 // regulation of transcription, DNA-dependent // traceable author statement /// 0016568 // chromatin modification // inferred from electronic annotation /// 0045449 // regulation	0005622 // intracellular // non-traceable author statement /// 0005634 // nucleus // inferred from electronic annotation	0005515 // protein binding // inferred from physical interaction /// 0016491 // oxidoreductase activity // inferred from electronic annotation /// 0016702 // oxidoreductase activity, acting on single donors with incorporation of molecular oxygen, incorpor	---
201466_s_at	jun proto-oncogene	JUN	816.583	733.35	382.031	100	502.117	430.75	185.314	100	0.738889	1.66889	63.8889	11.1111	0.118542	0.000151785	0.00252707	0.000663608	25	26.6667	33.3333	chr1p32-p31	0001525 // angiogenesis // inferred from electronic annotation /// 0001836 // release of cytochrome c from mitochondria // inferred from electronic annotation /// 0006350 // transcription // inferred from electronic annotation /// 0006355 // regulation of	0000228 // nuclear chromosome // traceable author statement /// 0000790 // nuclear chromatin // inferred from electronic annotation /// 0005634 // nucleus // inferred from electronic annotation /// 0005654 // nucleoplasm // not recorded /// 0005667 // tra	0003677 // DNA binding // traceable author statement /// 0003677 // DNA binding // inferred from electronic annotation /// 0003690 // double-stranded DNA binding // inferred from electronic annotation /// 0003700 // sequence-specific DNA binding transcrip	Apoptosis // GenMAPP /// Apoptosis_GenMAPP // GenMAPP /// MAPK_Cascade // GenMAPP /// Smooth_muscle_contraction // GenMAPP /// TGF_Beta_Signaling_Pathway // GenMAPP /// Wnt_signaling // GenMAPP
201464_x_at	jun proto-oncogene	JUN	3511	3668.45	1371.24	100	2463.1	2445.8	705.869	100	0.527778	1.44171	61.1111	16.6667	0.230416	0.00238878	0.0198205	0.00440863	22.2222	20	13.3333	chr1p32-p31	0001525 // angiogenesis // inferred from electronic annotation /// 0001836 // release of cytochrome c from mitochondria // inferred from electronic annotation /// 0006350 // transcription // inferred from electronic annotation /// 0006355 // regulation of	0000228 // nuclear chromosome // traceable author statement /// 0000790 // nuclear chromatin // inferred from electronic annotation /// 0005634 // nucleus // inferred from electronic annotation /// 0005654 // nucleoplasm // not recorded /// 0005667 // tra	0003677 // DNA binding // traceable author statement /// 0003677 // DNA binding // inferred from electronic annotation /// 0003690 // double-stranded DNA binding // inferred from electronic annotation /// 0003700 // sequence-specific DNA binding transcrip	Apoptosis // GenMAPP /// Apoptosis_GenMAPP // GenMAPP /// MAPK_Cascade // GenMAPP /// Smooth_muscle_contraction // GenMAPP /// TGF_Beta_Signaling_Pathway // GenMAPP /// Wnt_signaling // GenMAPP
223584_s_at	kelch repeat and BTB (POZ) domain containing 2	KBTBD2	240.033	223.15	101.149	100	362.683	354.3	137.343	100	-0.666667	-1.5874	13.8889	63.8889	0.15376	0.000888036	0.00692397	0.00413412	22.2222	13.3333	40	chr7p14.3	---	---	0005515 // protein binding // inferred from electronic annotation	---
223412_at	kelch repeat and BTB (POZ) domain containing 7	KBTBD7	355.75	306.7	122.748	100	227.95	180.35	116.391	100	0.633333	1.55114	63.8889	11.1111	0.0726431	0.00029597	0.000928148	0.00502683	25	33.3333	33.3333	chr13q14.11	---	---	0005515 // protein binding // inferred from electronic annotation	---
206765_at	potassium inwardly-rectifying channel, subfamily J, member 2	KCNJ2	451	349.25	221.95	100	199.583	201.9	59.0716	100	1.06389	2.09056	72.2222	5.55556	0.0161291	6.59609e-07	0.000164699	2.27878e-06	22.2222	26.6667	40	chr17q24.3	0006810 // transport // inferred from electronic annotation /// 0006811 // ion transport // inferred from electronic annotation /// 0006813 // potassium ion transport // inferred from electronic annotation /// 0006813 // potassium ion transport // traceab	0005887 // integral to plasma membrane // traceable author statement /// 0016020 // membrane // inferred from electronic annotation /// 0016021 // integral to membrane // inferred from electronic annotation /// 0030425 // dendrite // inferred from electro	0005216 // ion channel activity // inferred from electronic annotation /// 0005242 // inward rectifier potassium channel activity // inferred from electronic annotation /// 0005242 // inward rectifier potassium channel activity // traceable author stateme	---
206700_s_at	lysine (K)-specific demethylase 5D	KDM5D	42.7833	12.7	69.4972	16.6667	374.367	519.55	258.627	66.6667	-2.77778	-6.85795	5.55556	66.6667	0.0903016	0.000168103	8.30231e-05	0.00732529	27.7778	66.6667	26.6667	chrYq11|Yq11	0007283 // spermatogenesis // non-traceable author statement /// 0016568 // chromatin modification // inferred from electronic annotation /// 0055114 // oxidation reduction // inferred from electronic annotation	0005622 // intracellular // inferred from electronic annotation /// 0005634 // nucleus // inferred from electronic annotation	0003677 // DNA binding // inferred from electronic annotation /// 0005515 // protein binding // inferred from physical interaction /// 0005515 // protein binding // inferred from electronic annotation /// 0008270 // zinc ion binding // inferred from elect	---
203991_s_at	lysine (K)-specific demethylase 6A	KDM6A	219.25	189.95	63.7879	100	144.533	118.1	73.6352	100	0.583333	1.49831	61.1111	13.8889	0.0518064	3.103e-05	0.000108777	0.0014507	25	66.6667	73.3333	chrXp11.2	0016568 // chromatin modification // inferred from electronic annotation /// 0055114 // oxidation reduction // inferred from electronic annotation	0005634 // nucleus // inferred from direct assay /// 0005634 // nucleus // inferred from electronic annotation /// 0005730 // nucleolus // inferred from direct assay /// 0005794 // Golgi apparatus // inferred from direct assay /// 0035097 // histone methy	0005488 // binding // inferred from electronic annotation /// 0016491 // oxidoreductase activity // inferred from electronic annotation /// 0016702 // oxidoreductase activity, acting on single donors with incorporation of molecular oxygen, incorporation o	---
203543_s_at	Kruppel-like factor 9	KLF9	553.9	460.05	410.94	100	282.817	287.95	91.0631	100	0.694444	1.61826	63.8889	16.6667	0.249499	0.00849385	0.0591616	0.00596063	19.4444	13.3333	26.6667	chr9q13	0006350 // transcription // inferred from electronic annotation /// 0006357 // regulation of transcription from RNA polymerase II promoter // traceable author statement /// 0007566 // embryo implantation // inferred from electronic annotation /// 0045449	0005622 // intracellular // inferred from electronic annotation /// 0005634 // nucleus // inferred from electronic annotation	0003676 // nucleic acid binding // inferred from electronic annotation /// 0003677 // DNA binding // inferred from electronic annotation /// 0003700 // sequence-specific DNA binding transcription factor activity // traceable author statement /// 0008270 /	Circadian_Exercise // GenMAPP
219157_at	kelch-like 2, Mayven (Drosophila)	KLHL2	1219.58	1076.05	405.098	100	764.083	739.2	106.338	100	0.572222	1.48681	72.2222	0	0.0195962	1.31319e-07	4.84533e-05	4.07755e-07	27.7778	53.3333	46.6667	chr4q21.2	0006886 // intracellular protein transport // traceable author statement	0005737 // cytoplasm // inferred from electronic annotation /// 0005856 // cytoskeleton // traceable author statement /// 0005856 // cytoskeleton // inferred from electronic annotation /// 0015629 // actin cytoskeleton // traceable author statement	0003779 // actin binding // inferred from electronic annotation /// 0005215 // transporter activity // traceable author statement /// 0005515 // protein binding // inferred from electronic annotation	---
242648_at	kelch-like 8 (Drosophila)	KLHL8	1310.43	1197.6	335.476	100	801.683	698.15	221.119	100	0.691667	1.61515	80.5556	5.55556	0.0108821	1.01134e-08	3.85775e-06	3.51689e-07	13.8889	40	26.6667	chr4q22.1	---	---	0005515 // protein binding // inferred from electronic annotation	---
214352_s_at	v-Ki-ras2 Kirsten rat sarcoma viral oncogene homolog	KRAS	398.25	380.95	84.8459	100	554.583	565.6	123.324	100	-0.486111	-1.40066	0	66.6667	0.0420504	1.51562e-06	1.38607e-05	0.000187537	33.3333	73.3333	40	chr12p12.1	0006915 // apoptosis // inferred from electronic annotation /// 0007165 // signal transduction // inferred from electronic annotation /// 0007264 // small GTPase mediated signal transduction // not recorded /// 0007264 // small GTPase mediated signal tran	0005622 // intracellular // inferred from electronic annotation /// 0005625 // soluble fraction // inferred from electronic annotation /// 0005739 // mitochondrion // inferred from electronic annotation /// 0005792 // microsome // inferred from electronic	0000166 // nucleotide binding // inferred from electronic annotation /// 0003924 // GTPase activity // inferred from electronic annotation /// 0005515 // protein binding // inferred from physical interaction /// 0005515 // protein binding // inferred from	G_Protein_Signaling // GenMAPP /// MAPK_Cascade // GenMAPP
218303_x_at	lysine-rich coiled-coil 1	KRCC1	1251.38	1191.9	123.438	100	933.6	847.15	219.4	100	0.4	1.31951	63.8889	8.33333	0.0240955	7.21931e-05	7.38182e-05	0.00384787	27.7778	60	40	chr2p11.2	---	---	---	---
202068_s_at	low density lipoprotein receptor	LDLR	311.633	320.75	83.412	100	426.833	443.95	76.1771	100	-0.652778	-1.57219	5.55556	69.4444	0.0572477	7.22106e-06	0.000799253	1.65017e-05	25	20	33.3333	chr19p13.3	0006493 // protein O-linked glycosylation // traceable author statement /// 0006629 // lipid metabolic process // traceable author statement /// 0006629 // lipid metabolic process // inferred from electronic annotation /// 0006810 // transport // inferred	0005764 // lysosome // inferred from direct assay /// 0005768 // endosome // inferred from electronic annotation /// 0005769 // early endosome // inferred from direct assay /// 0005886 // plasma membrane // not recorded /// 0005886 // plasma membrane // i	0004872 // receptor activity // inferred from electronic annotation /// 0004888 // transmembrane receptor activity // traceable author statement /// 0005041 // low-density lipoprotein receptor activity // inferred from direct assay /// 0005041 // low-dens	Statin_Pathway_PharmGKB // GenMAPP /// Wnt_signaling // GenMAPP
208450_at	lectin, galactoside-binding, soluble, 2	LGALS2	1964.63	2093.65	1041.81	100	3189.85	3172.8	1260.77	100	-0.772222	-1.7079	13.8889	63.8889	0.132582	0.00169734	0.0165786	0.00327038	22.2222	26.6667	20	chr22q12-q13|22q13.1	---	---	0005529 // sugar binding // inferred from electronic annotation /// 0016936 // galactoside binding // inferred from electronic annotation	---
212658_at	lipoma HMGIC fusion partner-like 2	LHFPL2	319.733	309.6	118.292	100	208.367	193.8	56.3241	100	0.636111	1.55413	69.4444	0	0.0645906	1.69936e-07	4.03083e-05	1.99843e-06	30.5556	53.3333	53.3333	chr5q14.1	---	0016020 // membrane // inferred from electronic annotation /// 0016021 // integral to membrane // inferred from electronic annotation	---	---
230082_at	Hypothetical LOC100133660	LOC100133660	125.15	113.35	49.1458	100	236.683	213.65	112.815	100	-0.802778	-1.74446	8.33333	69.4444	0.0847028	0.000102027	0.000130116	0.00336033	22.2222	40	33.3333	---	---	---	---	---
235147_at	Hypothetical protein LOC100288092	LOC100288092	94.0167	85.95	18.3196	100	59.0333	54.85	27.178	100	0.844444	1.79557	63.8889	0	0.0336844	1.46785e-08	1.11188e-06	4.64582e-06	36.1111	86.6667	60	chr2q33.1	---	---	---	---
215434_x_at	neuroblastoma breakpoint family member /// neuroblastoma breakpoint family, member 1 /// neuroblastoma breakpoint family, member 10	LOC100288142 /// NBPF1 /// NBPF10	393.667	321	250.823	100	577.05	650.4	270.699	100	-0.680556	-1.60276	0	66.6667	0.280949	3.45671e-05	0.00183712	3.48067e-05	33.3333	46.6667	53.3333	chr1p36.13 /// chr1q21.1 /// chr1q21.2	0007219 // Notch signaling pathway // inferred from electronic annotation /// 0007275 // multicellular organismal development // inferred from electronic annotation /// 0030154 // cell differentiation // inferred from electronic annotation	0005576 // extracellular region // inferred from electronic annotation /// 0005737 // cytoplasm // inferred from electronic annotation	0005509 // calcium ion binding // inferred from electronic annotation	---
1555847_a_at	hypothetical LOC284454	LOC284454	394.967	300.9	260.389	100	668.333	614.25	378.464	100	-0.691667	-1.61515	25	69.4444	0.216456	0.0161047	0.0361027	0.0509377	5.55556	33.3333	40	chr19p13.13	---	---	---	---
1558882_at	HIV-1 Tat specific factor 1 pseudogene	LOC401233	311.917	305.75	117.168	100	155.067	167.15	72.2781	100	1.31111	2.48133	63.8889	2.77778	0.087155	0.00010348	2.16427e-05	0.0069985	33.3333	33.3333	33.3333	chr6p25.2	---	---	---	---
235359_at	leucine rich repeat containing 33	LRRC33	444.4	445.75	95.685	100	730.617	706.8	172.909	100	-0.625	-1.54221	0	63.8889	0.00590427	1.0049e-08	2.34455e-06	1.83543e-06	36.1111	46.6667	26.6667	chr3q29	---	0016020 // membrane // inferred from electronic annotation /// 0016021 // integral to membrane // inferred from electronic annotation	0005515 // protein binding // inferred from electronic annotation	---
236172_at	leukotriene B4 receptor	LTB4R	701.667	637.2	211.469	100	437.5	447.1	74.7798	100	0.627778	1.54518	66.6667	0	0.0126459	2.90951e-08	1.46433e-05	2.71172e-07	33.3333	46.6667	66.6667	chr14q11.2-q12	0006928 // cellular component movement // traceable author statement /// 0006936 // muscle contraction // traceable author statement /// 0006954 // inflammatory response // inferred from electronic annotation /// 0006954 // inflammatory response // tracea	0005886 // plasma membrane // not recorded /// 0005886 // plasma membrane // inferred from electronic annotation /// 0005887 // integral to plasma membrane // traceable author statement /// 0016020 // membrane // inferred from electronic annotation /// 00	0000166 // nucleotide binding // traceable author statement /// 0001632 // leukotriene B4 receptor activity // inferred from electronic annotation /// 0004871 // signal transducer activity // inferred from electronic annotation /// 0004872 // receptor act	GPCRDB_Class_A_Rhodopsin-like // GenMAPP /// Nucleotide_GPCRs // GenMAPP
202145_at	lymphocyte antigen 6 complex, locus E	LY6E	77.6667	64.55	48.4217	83.3333	124.717	101.45	63.412	100	-0.783333	-1.7211	11.1111	61.1111	0.135969	0.000138299	0.00171256	0.000782735	27.7778	40	33.3333	chr8q24.3	0001701 // in utero embryonic development // inferred from electronic annotation /// 0007166 // cell surface receptor linked signaling pathway // traceable author statement /// 0030325 // adrenal gland development // inferred from electronic annotation //	0005886 // plasma membrane // inferred from electronic annotation /// 0005887 // integral to plasma membrane // traceable author statement /// 0016020 // membrane // inferred from electronic annotation /// 0031225 // anchored to membrane // inferred from	---	---
36711_at	v-maf musculoaponeurotic fibrosarcoma oncogene homolog F (avian)	MAFF	118.3	58.85	166.464	83.3333	212.833	124.5	189.138	100	-1.20278	-2.30182	16.6667	63.8889	0.197602	0.0119439	0.0452852	0.0259305	19.4444	26.6667	13.3333	chr22q13.1	0001701 // in utero embryonic development // inferred from electronic annotation /// 0006350 // transcription // inferred from electronic annotation /// 0006355 // regulation of transcription, DNA-dependent // inferred from electronic annotation /// 00063	0005634 // nucleus // inferred from electronic annotation	0003677 // DNA binding // inferred from electronic annotation /// 0003700 // sequence-specific DNA binding transcription factor activity // inferred from electronic annotation /// 0043565 // sequence-specific DNA binding // inferred from electronic annota	Smooth_muscle_contraction // GenMAPP
224559_at	metastasis associated lung adenocarcinoma transcript 1 (non-protein coding)	MALAT1	556.65	421.65	381.07	100	384.033	321.45	200.935	100	0.694444	1.61826	61.1111	22.2222	0.312324	0.00949966	0.0241575	0.038354	16.6667	33.3333	20	chr11q13.1	---	---	---	---
205698_s_at	mitogen-activated protein kinase kinase 6	MAP2K6	421.033	382.35	132.784	100	257.633	260.35	41.7131	100	0.669444	1.59046	69.4444	0	0.0188069	1.65517e-09	2.47251e-06	5.26865e-08	30.5556	46.6667	86.6667	chr17q24.3	0000165 // MAPKKK cascade // inferred from electronic annotation /// 0000187 // activation of MAPK activity // inferred from electronic annotation /// 0006468 // protein phosphorylation // inferred from electronic annotation /// 0006915 // apoptosis // in	0005829 // cytosol // not recorded	0000166 // nucleotide binding // inferred from electronic annotation /// 0004672 // protein kinase activity // inferred from electronic annotation /// 0004674 // protein serine/threonine kinase activity // inferred from electronic annotation /// 0004708 /	Integrin-mediated_cell_adhesion_KEGG // GenMAPP /// MAPK_Cascade // GenMAPP
202787_s_at	mitogen-activated protein kinase-activated protein kinase 3	MAPKAPK3	477.767	429.9	182.98	100	575.633	553	88.515	100	-0.433333	-1.35035	13.8889	63.8889	0.199622	0.00018273	0.00891693	4.23499e-05	22.2222	40	66.6667	chr3p21.3	0006468 // protein phosphorylation // inferred from electronic annotation /// 0006950 // response to stress // traceable author statement /// 0007165 // signal transduction // traceable author statement /// 0007265 // Ras protein signal transduction // no	0005634 // nucleus // inferred from electronic annotation /// 0005634 // nucleus // traceable author statement /// 0005737 // cytoplasm // inferred from electronic annotation /// 0005829 // cytosol // not recorded	0000166 // nucleotide binding // inferred from electronic annotation /// 0004672 // protein kinase activity // inferred from electronic annotation /// 0004674 // protein serine/threonine kinase activity // inferred from electronic annotation /// 0004708 /	---
225897_at	myristoylated alanine-rich protein kinase C substrate	MARCKS	854.283	752.3	408.144	100	1272.43	1243.05	304.194	100	-0.686111	-1.60894	11.1111	61.1111	0.0857074	0.000343476	0.00713835	0.000510955	27.7778	6.66667	26.6667	chr6q22.2	---	0005737 // cytoplasm // inferred from electronic annotation /// 0005813 // centrosome // inferred from electronic annotation /// 0005856 // cytoskeleton // inferred from electronic annotation /// 0005938 // cell cortex // inferred from electronic annotati	0003779 // actin binding // inferred from electronic annotation /// 0005080 // protein kinase C binding // inferred from electronic annotation /// 0005516 // calmodulin binding // inferred from electronic annotation /// 0005516 // calmodulin binding // tr	---
201670_s_at	myristoylated alanine-rich protein kinase C substrate	MARCKS	1248.45	1276.75	361.585	100	2382.02	2317.25	686.881	100	-0.863889	-1.81994	8.33333	83.3333	0.00967094	7.22395e-08	7.71589e-06	4.50949e-06	8.33333	33.3333	33.3333	chr6q22.2	---	0005737 // cytoplasm // inferred from electronic annotation /// 0005813 // centrosome // inferred from electronic annotation /// 0005856 // cytoskeleton // inferred from electronic annotation /// 0005938 // cell cortex // inferred from electronic annotati	0003779 // actin binding // inferred from electronic annotation /// 0005080 // protein kinase C binding // inferred from electronic annotation /// 0005516 // calmodulin binding // inferred from electronic annotation /// 0005516 // calmodulin binding // tr	---
201669_s_at	myristoylated alanine-rich protein kinase C substrate	MARCKS	3099.25	3196.7	843.486	100	4729.92	4930.45	1116.03	100	-0.666667	-1.5874	2.77778	75	0.0496504	9.6614e-07	0.000124253	8.07229e-06	22.2222	60	40	chr6q22.2	---	0005737 // cytoplasm // inferred from electronic annotation /// 0005813 // centrosome // inferred from electronic annotation /// 0005856 // cytoskeleton // inferred from electronic annotation /// 0005938 // cell cortex // inferred from electronic annotati	0003779 // actin binding // inferred from electronic annotation /// 0005080 // protein kinase C binding // inferred from electronic annotation /// 0005516 // calmodulin binding // inferred from electronic annotation /// 0005516 // calmodulin binding // tr	---
200644_at	MARCKS-like 1	MARCKSL1	390.8	423.2	154.494	100	696.733	587.6	400.986	100	-0.811111	-1.75456	2.77778	61.1111	0.126023	1.58518e-05	5.79927e-05	0.00074406	36.1111	60	20	chr1p35.1	0008284 // positive regulation of cell proliferation // inferred from electronic annotation /// 0016192 // vesicle-mediated transport // inferred from electronic annotation	0005886 // plasma membrane // inferred from direct assay	0005516 // calmodulin binding // inferred from electronic annotation	---
1558111_at	muscleblind-like (Drosophila)	MBNL1	525.983	527.05	232.307	100	818.867	775.15	378.765	100	-0.569444	-1.48395	16.6667	61.1111	0.25515	0.0342925	0.0497626	0.105335	22.2222	20	20	chr3q25	0000381 // regulation of alternative nuclear mRNA splicing, via spliceosome // inferred from electronic annotation /// 0001701 // in utero embryonic development // inferred from sequence or structural similarity /// 0006376 // mRNA splice site selection /	0005634 // nucleus // inferred from direct assay /// 0005634 // nucleus // inferred from electronic annotation /// 0005737 // cytoplasm // inferred from direct assay /// 0005737 // cytoplasm // inferred from electronic annotation /// 0010494 // stress gra	0003676 // nucleic acid binding // inferred from electronic annotation /// 0003723 // RNA binding // inferred from direct assay /// 0003723 // RNA binding // inferred from electronic annotation /// 0003725 // double-stranded RNA binding // inferred from d	---
229021_at	multiple C2 domains, transmembrane 2	MCTP2	142.533	130.1	67.9228	100	70.0333	62.4	25.4876	100	0.838889	1.78867	69.4444	2.77778	0.030122	2.55614e-06	0.000133983	6.20148e-05	27.7778	40	66.6667	chr15q26.2	0019722 // calcium-mediated signaling // non-traceable author statement	0005624 // membrane fraction // inferred from direct assay /// 0016020 // membrane // inferred from electronic annotation /// 0016021 // integral to membrane // inferred from direct assay /// 0016021 // integral to membrane // inferred from electronic ann	0005509 // calcium ion binding // inferred from direct assay /// 0005544 // calcium-dependent phospholipid binding // inferred from direct assay	---
225955_at	meteorin, glial cell differentiation regulator-like	METRNL	652.333	586.75	227.193	100	1201.28	931.6	672.505	100	-0.777778	-1.71449	5.55556	69.4444	0.0643739	1.35544e-05	3.89032e-05	0.000939412	25	40	20	chr17q25.3	---	0005576 // extracellular region // inferred from electronic annotation	---	---
213457_at	malignant fibrous histiocytoma amplified sequence 1	MFHAS1	109.35	113	46.332	100	198.467	190.7	64.6978	100	-0.936111	-1.91336	0	66.6667	0.057863	8.6853e-06	0.00163915	1.36144e-06	33.3333	46.6667	80	chr8p23.1	---	---	0005515 // protein binding // inferred from electronic annotation	---
225478_at	malignant fibrous histiocytoma amplified sequence 1	MFHAS1	126.6	133.25	29.2416	100	174.75	173.1	32.5941	100	-0.591667	-1.50699	0	66.6667	0.0427215	6.51681e-09	3.9986e-05	3.62005e-09	33.3333	46.6667	93.3333	chr8p23.1	---	---	0005515 // protein binding // inferred from electronic annotation	---
206522_at	maltase-glucoamylase (alpha-glucosidase)	MGAM	328.033	283.15	217.066	100	148.067	105.3	101.127	100	0.969444	1.95809	61.1111	11.1111	0.117246	0.00128341	0.00882163	0.00546757	27.7778	13.3333	33.3333	chr7q34	0005975 // carbohydrate metabolic process // inferred from electronic annotation /// 0005983 // starch catabolic process // traceable author statement /// 0008152 // metabolic process // inferred from electronic annotation	0005886 // plasma membrane // inferred from electronic annotation /// 0016020 // membrane // inferred from electronic annotation /// 0016021 // integral to membrane // inferred from electronic annotation /// 0016324 // apical plasma membrane // inferred f	0003824 // catalytic activity // traceable author statement /// 0003824 // catalytic activity // inferred from electronic annotation /// 0004339 // glucan 1,4-alpha-glucosidase activity // inferred from electronic annotation /// 0004553 // hydrolase activ	---
217871_s_at	macrophage migration inhibitory factor (glycosylation-inhibiting factor)	MIF	1036.73	1001.7	333.447	100	1310.63	1364.85	354.241	100	-0.336111	-1.26235	11.1111	63.8889	0.230313	0.0160714	0.0575952	0.0323752	25	40	26.6667	chr22q11.23	0001516 // prostaglandin biosynthetic process // inferred from direct assay /// 0001934 // positive regulation of protein phosphorylation // inferred from electronic annotation /// 0006954 // inflammatory response // inferred from electronic annotation //	0005576 // extracellular region // inferred from direct assay /// 0005576 // extracellular region // inferred from electronic annotation /// 0005615 // extracellular space // inferred from electronic annotation /// 0005737 // cytoplasm // inferred from el	0004167 // dopachrome isomerase activity // inferred from direct assay /// 0004167 // dopachrome isomerase activity // inferred from electronic annotation /// 0005102 // receptor binding // inferred from physical interaction /// 0005125 // cytokine activi	---
243857_at	Mortality factor 4 like 2	MORF4L2	60.1333	43.7	46.5796	100	157.383	155.05	112.774	100	-1.22222	-2.33306	11.1111	61.1111	0.150657	0.000689163	0.00224539	0.00685634	27.7778	33.3333	13.3333	chrXq22	0001558 // regulation of cell growth // non-traceable author statement /// 0006281 // DNA repair // inferred from electronic annotation /// 0006350 // transcription // inferred from electronic annotation /// 0006974 // response to DNA damage stimulus // i	0005634 // nucleus // inferred from electronic annotation /// 0005730 // nucleolus // inferred from direct assay	0005515 // protein binding // inferred from physical interaction	---
221895_at	motile sperm domain containing 2	MOSPD2	1202.1	1229.75	206.148	100	910.45	774.4	270.319	100	0.358333	1.28194	63.8889	13.8889	0.0737958	0.000731109	0.00120536	0.011167	22.2222	53.3333	46.6667	chrXp22.2	---	0016020 // membrane // inferred from electronic annotation /// 0016021 // integral to membrane // inferred from electronic annotation	0005198 // structural molecule activity // inferred from electronic annotation	---
229510_at	membrane-spanning 4-domains, subfamily A, member 14	MS4A14	325.867	315.5	102.294	100	458.967	480	74.8691	100	-0.522222	-1.43617	5.55556	61.1111	0.052382	8.46914e-05	0.0039573	7.93687e-05	33.3333	26.6667	53.3333	chr11q12.2	---	0016020 // membrane // inferred from electronic annotation /// 0016021 // integral to membrane // inferred from electronic annotation	0004872 // receptor activity // inferred from electronic annotation	---
219607_s_at	membrane-spanning 4-domains, subfamily A, member 4	MS4A4A	863.783	779.85	401.889	100	557.15	529.2	101.082	100	0.527778	1.44171	61.1111	8.33333	0.136439	0.00134869	0.023931	0.000554356	30.5556	13.3333	46.6667	chr11q12	---	0016020 // membrane // inferred from electronic annotation /// 0016021 // integral to membrane // inferred from electronic annotation	0004872 // receptor activity // inferred from electronic annotation	---
202197_at	myotubularin related protein 3	MTMR3	779.8	728.65	180.872	100	545.967	582.9	92.5055	100	0.477778	1.3926	63.8889	0	0.0177708	6.07356e-07	2.84575e-05	2.99998e-05	36.1111	73.3333	53.3333	chr22q12.2	0006470 // protein dephosphorylation // inferred from direct assay /// 0016311 // dephosphorylation // inferred from electronic annotation	0005624 // membrane fraction // inferred from direct assay /// 0005737 // cytoplasm // inferred from direct assay /// 0005737 // cytoplasm // inferred from electronic annotation /// 0016020 // membrane // inferred from electronic annotation	0004721 // phosphoprotein phosphatase activity // inferred from electronic annotation /// 0004722 // protein serine/threonine phosphatase activity // inferred from direct assay /// 0004725 // protein tyrosine phosphatase activity // inferred from direct a	---
203037_s_at	metastasis suppressor 1	MTSS1	1009.32	1026	274.694	100	1570.87	1569.8	235.944	100	-0.630556	-1.54816	0	63.8889	0.0134111	1.36731e-07	5.2738e-05	6.15674e-07	36.1111	26.6667	53.3333	chr8p22	0006928 // cellular component movement // non-traceable author statement /// 0007155 // cell adhesion // non-traceable author statement /// 0007165 // signal transduction // inferred from electronic annotation /// 0007169 // transmembrane receptor protein	0001726 // ruffle // non-traceable author statement /// 0005737 // cytoplasm // traceable author statement /// 0005737 // cytoplasm // inferred from electronic annotation /// 0005856 // cytoskeleton // inferred from electronic annotation /// 0015629 // ac	0003779 // actin binding // inferred from electronic annotation /// 0003785 // actin monomer binding // inferred from direct assay /// 0005102 // receptor binding // inferred from physical interaction /// 0008093 // cytoskeletal adaptor activity // inferr	---
224920_x_at	myeloid-associated differentiation marker	MYADM	527.833	466.25	161.517	100	892.283	852.2	247.009	100	-0.797222	-1.73775	2.77778	77.7778	0.0135529	1.65525e-07	4.05166e-05	1.86778e-06	19.4444	26.6667	53.3333	chr19q13.42	---	0016020 // membrane // inferred from electronic annotation /// 0016021 // integral to membrane // inferred from electronic annotation	---	---
225673_at	myeloid-associated differentiation marker	MYADM	4943.95	5165.6	855.799	100	7011.8	7308.85	795.548	100	-0.475	-1.38992	0	69.4444	0.00526103	1.4479e-10	6.68347e-07	8.61599e-10	30.5556	40	80	chr19q13.42	---	0016020 // membrane // inferred from electronic annotation /// 0016021 // integral to membrane // inferred from electronic annotation	---	---
202431_s_at	v-myc myelocytomatosis viral oncogene homolog (avian)	MYC	455.583	388.5	214.514	100	234.017	225.35	70.2048	100	0.844444	1.79557	66.6667	5.55556	0.0349024	1.13383e-06	0.000143602	5.26549e-06	27.7778	33.3333	46.6667	chr8q24.21	0001658 // branching involved in ureteric bud morphogenesis // inferred from sequence or structural similarity /// 0001658 // branching involved in ureteric bud morphogenesis // inferred from electronic annotation /// 0001783 // B cell apoptosis // inferr	0005634 // nucleus // inferred from direct assay /// 0005634 // nucleus // inferred from electronic annotation /// 0005634 // nucleus // traceable author statement /// 0005654 // nucleoplasm // inferred from direct assay /// 0005654 // nucleoplasm // infe	0003677 // DNA binding // traceable author statement /// 0003677 // DNA binding // inferred from electronic annotation /// 0003690 // double-stranded DNA binding // inferred from electronic annotation /// 0003700 // sequence-specific DNA binding transcrip	Apoptosis // GenMAPP /// Apoptosis_GenMAPP // GenMAPP /// G1_to_S_cell_cycle_Reactome // GenMAPP /// Wnt_signaling // GenMAPP
32069_at	NEDD4 binding protein 1	N4BP1	1093.68	1018.15	256.567	100	878.6	894.25	134.058	100	0.327778	1.25508	63.8889	0	0.119319	7.72749e-10	3.62488e-08	1.60552e-06	36.1111	100	66.6667	chr16q12.1	0031397 // negative regulation of protein ubiquitination // inferred from sequence or structural similarity /// 0032435 // negative regulation of proteasomal ubiquitin-dependent protein catabolic process // inferred from sequence or structural similarity	0005634 // nucleus // inferred from electronic annotation /// 0005730 // nucleolus // inferred from sequence or structural similarity /// 0005730 // nucleolus // inferred from electronic annotation /// 0016605 // PML body // inferred from sequence or stru	---	---
204861_s_at	NLR family, apoptosis inhibitory protein	NAIP	964.983	895.05	393.731	100	534.75	554.45	149.293	100	0.619444	1.53628	61.1111	0	0.0398875	1.1215e-07	9.69283e-05	5.81454e-08	38.8889	46.6667	100	chr5q13.1	0006915 // apoptosis // inferred from electronic annotation /// 0006916 // anti-apoptosis // traceable author statement /// 0007399 // nervous system development // traceable author statement	0005622 // intracellular // inferred from electronic annotation	0000166 // nucleotide binding // inferred from electronic annotation /// 0005524 // ATP binding // inferred from electronic annotation /// 0017111 // nucleoside-triphosphatase activity // inferred from electronic annotation /// 0046872 // metal ion bindin	---
228055_at	napsin B aspartic peptidase pseudogene	NAPSB	592.25	609.55	306.112	83.3333	1207.35	1172.2	701.819	83.3333	-0.538889	-1.45285	13.8889	80.5556	0.80274	0.512181	0.514881	0.6309	5.55556	6.66667	13.3333	chr19q13.33	0006508 // proteolysis // inferred from electronic annotation	---	0004190 // aspartic-type endopeptidase activity // inferred from electronic annotation /// 0008233 // peptidase activity // inferred from electronic annotation /// 0016787 // hydrolase activity // inferred from electronic annotation	---
228056_s_at	napsin B aspartic peptidase pseudogene	NAPSB	203.85	224.7	107.279	83.3333	456.967	482.1	241.186	83.3333	-0.997222	-1.99615	13.8889	72.2222	0.599887	0.257157	0.324116	0.365048	13.8889	26.6667	20	chr19q13.33	0006508 // proteolysis // inferred from electronic annotation	---	0004190 // aspartic-type endopeptidase activity // inferred from electronic annotation /// 0008233 // peptidase activity // inferred from electronic annotation /// 0016787 // hydrolase activity // inferred from electronic annotation	---
201104_x_at	neuroblastoma breakpoint family, member 1 /// neuroblastoma breakpoint family, member 10 /// neuroblastoma breakpoint family, member 11 /// neuroblastoma breakpoint family, member 12 /// neuroblastoma breakpoint family, member 14 /// neuroblastoma breakpo	NBPF1 /// NBPF10 /// NBPF11 /// NBPF12 /// NBPF14 /// NBPF15 /// NBPF16 /// NBPF24 /// NBPF8	1462.75	1518.65	165.581	100	2018.3	2077.6	424.943	100	-0.408333	-1.32715	0	66.6667	0.0255743	7.53709e-07	8.14172e-06	8.76381e-05	33.3333	66.6667	53.3333	chr1p36.13 /// chr1q21.1 /// chr1q21.2	0007219 // Notch signaling pathway // inferred from electronic annotation /// 0007275 // multicellular organismal development // inferred from electronic annotation /// 0030154 // cell differentiation // inferred from electronic annotation	0005576 // extracellular region // inferred from electronic annotation /// 0005737 // cytoplasm // inferred from electronic annotation	0005509 // calcium ion binding // inferred from electronic annotation	---
214693_x_at	neuroblastoma breakpoint family, member 10	NBPF10	1980.13	1998.7	597.621	100	3385.97	3581.65	753.625	100	-0.438889	-1.35556	2.77778	63.8889	0.0132899	0.000362642	0.00778115	0.000777585	33.3333	40	53.3333	chr1q21.1	0007219 // Notch signaling pathway // inferred from electronic annotation /// 0007275 // multicellular organismal development // inferred from electronic annotation /// 0030154 // cell differentiation // inferred from electronic annotation	0005576 // extracellular region // inferred from electronic annotation /// 0005737 // cytoplasm // inferred from electronic annotation	0005509 // calcium ion binding // inferred from electronic annotation	---
218888_s_at	neuropilin (NRP) and tolloid (TLL)-like 2	NETO2	360.233	297.9	123.079	100	240.933	243.5	44.0387	100	0.647222	1.56615	72.2222	0	0.061926	8.23162e-08	0.000143189	2.97593e-08	27.7778	33.3333	73.3333	chr16q11	---	0016020 // membrane // inferred from electronic annotation /// 0016021 // integral to membrane // inferred from electronic annotation	0004872 // receptor activity // inferred from electronic annotation	---
212808_at	nuclear factor of activated T-cells, cytoplasmic, calcineurin-dependent 2 interacting protein	NFATC2IP	123.667	102.95	52.4318	100	184.85	190.95	42.5353	100	-0.438889	-1.35556	5.55556	61.1111	0.0480935	0.00341167	0.0233268	0.00780517	33.3333	66.6667	60	chr16p11.2	0001816 // cytokine production // inferred from electronic annotation /// 0006355 // regulation of transcription, DNA-dependent // inferred from electronic annotation	0005634 // nucleus // inferred from electronic annotation /// 0005737 // cytoplasm // inferred from electronic annotation	---	---
203927_at	nuclear factor of kappa light polypeptide gene enhancer in B-cells inhibitor, epsilon	NFKBIE	215.483	200.2	67.4214	66.6667	322.35	302	106.911	100	-0.694444	-1.61826	5.55556	63.8889	0.0573856	1.40727e-05	0.000251101	0.000349668	30.5556	53.3333	46.6667	chr6p21.1	0042942 // D-serine transport // inferred from electronic annotation /// 0042994 // cytoplasmic sequestering of transcription factor // traceable author statement	0005634 // nucleus // inferred from direct assay /// 0005730 // nucleolus // inferred from direct assay /// 0005737 // cytoplasm // inferred from direct assay /// 0005737 // cytoplasm // inferred from electronic annotation /// 0005737 // cytoplasm // trac	0005515 // protein binding // inferred from physical interaction	Apoptosis // GenMAPP
1552553_a_at	NLR family, CARD domain containing 4	NLRC4	820.167	796.65	129.856	100	589.517	561.85	121.256	100	0.497222	1.41149	66.6667	0	0.0150167	6.24161e-10	6.10184e-08	9.89832e-07	33.3333	86.6667	53.3333	chr2p22-p21	0006915 // apoptosis // inferred from electronic annotation /// 0006919 // activation of caspase activity // inferred from direct assay /// 0006954 // inflammatory response // inferred from electronic annotation /// 0016045 // detection of bacterium // in	0005622 // intracellular // non-traceable author statement /// 0005622 // intracellular // inferred from electronic annotation /// 0005737 // cytoplasm // inferred from electronic annotation	0000166 // nucleotide binding // inferred from electronic annotation /// 0000287 // magnesium ion binding // traceable author statement /// 0005515 // protein binding // inferred from physical interaction /// 0005515 // protein binding // inferred from el	---
203814_s_at	NAD(P)H dehydrogenase, quinone 2	NQO2	420.35	447.75	177.089	100	748.233	654.05	250.269	100	-0.969444	-1.95809	0	63.8889	0.0320832	1.33481e-06	0.000156173	1.09063e-05	36.1111	33.3333	40	chr6pter-q12	0055114 // oxidation reduction // inferred from electronic annotation	0005737 // cytoplasm // inferred from electronic annotation	0001512 // dihydronicotinamide riboside quinone reductase activity // inferred from electronic annotation /// 0008753 // NADPH dehydrogenase (quinone) activity // traceable author statement /// 0009055 // electron carrier activity // traceable author stat	---
204622_x_at	nuclear receptor subfamily 4, group A, member 2	NR4A2	242.933	239.5	137.441	100	673	506.15	473.561	100	-1.39444	-2.62887	16.6667	75	0.0934759	8.52074e-05	0.000868807	0.00115105	8.33333	20	13.3333	chr2q22-q23	0006350 // transcription // inferred from electronic annotation /// 0006355 // regulation of transcription, DNA-dependent // inferred from electronic annotation /// 0007165 // signal transduction // non-traceable author statement /// 0010035 // response t	0005634 // nucleus // inferred from electronic annotation /// 0005634 // nucleus // traceable author statement /// 0005737 // cytoplasm // inferred from electronic annotation	0003677 // DNA binding // inferred from electronic annotation /// 0003700 // sequence-specific DNA binding transcription factor activity // inferred from electronic annotation /// 0003707 // steroid hormone receptor activity // inferred from electronic an	Nuclear_Receptors // GenMAPP
204621_s_at	nuclear receptor subfamily 4, group A, member 2	NR4A2	215.65	162.75	191.159	100	475.817	350.25	329.358	83.3333	-1.18889	-2.27977	13.8889	69.4444	0.141264	0.00187492	0.00878275	0.00965644	16.6667	13.3333	13.3333	chr2q22-q23	0006350 // transcription // inferred from electronic annotation /// 0006355 // regulation of transcription, DNA-dependent // inferred from electronic annotation /// 0007165 // signal transduction // non-traceable author statement /// 0010035 // response t	0005634 // nucleus // inferred from electronic annotation /// 0005634 // nucleus // traceable author statement /// 0005737 // cytoplasm // inferred from electronic annotation	0003677 // DNA binding // inferred from electronic annotation /// 0003700 // sequence-specific DNA binding transcription factor activity // inferred from electronic annotation /// 0003707 // steroid hormone receptor activity // inferred from electronic an	Nuclear_Receptors // GenMAPP
216248_s_at	nuclear receptor subfamily 4, group A, member 2	NR4A2	213.65	205.85	130.668	100	662.933	481.2	457.59	100	-1.49444	-2.81756	11.1111	75	0.0600038	9.39351e-05	0.00133075	0.000853124	13.8889	6.66667	13.3333	chr2q22-q23	0006350 // transcription // inferred from electronic annotation /// 0006355 // regulation of transcription, DNA-dependent // inferred from electronic annotation /// 0007165 // signal transduction // non-traceable author statement /// 0010035 // response t	0005634 // nucleus // inferred from electronic annotation /// 0005634 // nucleus // traceable author statement /// 0005737 // cytoplasm // inferred from electronic annotation	0003677 // DNA binding // inferred from electronic annotation /// 0003700 // sequence-specific DNA binding transcription factor activity // inferred from electronic annotation /// 0003707 // steroid hormone receptor activity // inferred from electronic an	Nuclear_Receptors // GenMAPP
223650_s_at	nuclear receptor binding factor 2	NRBF2	522.7	525.4	93.6332	100	423.85	382.15	123.529	100	0.452778	1.36867	61.1111	5.55556	0.15042	9.95251e-06	4.57783e-05	0.0006915	33.3333	60	33.3333	chr10q21.3	0006350 // transcription // inferred from electronic annotation /// 0045449 // regulation of transcription // inferred from electronic annotation	0005634 // nucleus // inferred from electronic annotation /// 0005737 // cytoplasm // inferred from direct assay /// 0005737 // cytoplasm // inferred from electronic annotation	0004872 // receptor activity // inferred from electronic annotation /// 0005515 // protein binding // inferred from physical interaction	---
233085_s_at	oligonucleotide/oligosaccharide-binding fold containing 2A	OBFC2A	632.083	610.2	166.291	100	463.117	420.15	153.174	100	0.483333	1.39797	63.8889	8.33333	0.0963984	3.95012e-06	8.20449e-06	0.000622192	27.7778	53.3333	66.6667	chr2q32.3	0000724 // double-strand break repair via homologous recombination // inferred from mutant phenotype /// 0006281 // DNA repair // inferred from mutant phenotype /// 0006281 // DNA repair // inferred from electronic annotation /// 0006974 // response to DN	0005634 // nucleus // inferred from direct assay /// 0005634 // nucleus // inferred from electronic annotation /// 0070876 // SOSS complex // inferred from direct assay	0003676 // nucleic acid binding // inferred from electronic annotation /// 0003677 // DNA binding // inferred from electronic annotation /// 0003697 // single-stranded DNA binding // inferred from sequence or structural similarity /// 0003723 // RNA bindi	---
227492_at	occludin	OCLN	270	283.15	172.303	100	138.1	70.8	179.963	83.3333	1.76111	3.38959	61.1111	13.8889	0.168027	0.00344112	0.00290488	0.0335493	25	20	26.6667	chr5q13.1	0006461 // protein complex assembly // traceable author statement	0005886 // plasma membrane // not recorded /// 0005886 // plasma membrane // inferred from direct assay /// 0005886 // plasma membrane // traceable author statement /// 0005923 // tight junction // inferred from electronic annotation /// 0016020 // membra	0005198 // structural molecule activity // inferred from electronic annotation /// 0005515 // protein binding // inferred from physical interaction	---
205591_at	olfactomedin 1	OLFM1	54.4167	33.3	44.0231	33.3333	112.35	117.5	36.8317	100	-1.72778	-3.31217	5.55556	63.8889	0.07149	1.25971e-05	0.00200164	2.88152e-06	30.5556	46.6667	46.6667	chr9q34.3	0007275 // multicellular organismal development // inferred from electronic annotation /// 0007399 // nervous system development // traceable author statement /// 0051259 // protein oligomerization // inferred from electronic annotation	0005615 // extracellular space // inferred from electronic annotation /// 0005783 // endoplasmic reticulum // inferred from electronic annotation /// 0005788 // endoplasmic reticulum lumen // inferred from electronic annotation	0005515 // protein binding // inferred from physical interaction /// 0005515 // protein binding // inferred from electronic annotation	---
228170_at	oligodendrocyte transcription factor 1	OLIG1	899.6	844.15	337.727	100	1466.55	1354.55	365.706	100	-0.825	-1.77154	0	72.2222	0.0287794	2.85637e-07	0.000204195	3.59875e-07	27.7778	13.3333	40	chr21q22.11	0006350 // transcription // inferred from electronic annotation /// 0007275 // multicellular organismal development // inferred from electronic annotation /// 0045449 // regulation of transcription // inferred from electronic annotation /// 0048663 // neu	0005634 // nucleus // inferred from electronic annotation	0003677 // DNA binding // inferred from electronic annotation /// 0030528 // transcription regulator activity // inferred from electronic annotation	---
222586_s_at	oxysterol binding protein-like 11	OSBPL11	467.483	469.4	45.7015	100	729	770.8	202.099	100	-0.555556	-1.46973	5.55556	63.8889	0.0419627	4.06723e-07	2.94262e-06	7.86553e-05	30.5556	60	33.3333	chr3q21	0006810 // transport // inferred from electronic annotation /// 0006869 // lipid transport // inferred from electronic annotation /// 0008202 // steroid metabolic process // inferred from electronic annotation	---	---	---
220001_at	peptidyl arginine deiminase, type IV	PADI4	1149.47	1057.75	498.443	100	787.633	716.45	224.704	100	0.583333	1.49831	63.8889	13.8889	0.220553	0.000912809	0.00948203	0.00274926	22.2222	20	26.6667	chr1p36.13	0006350 // transcription // inferred from electronic annotation /// 0006464 // protein modification process // inferred from electronic annotation /// 0006464 // protein modification process // traceable author statement /// 0016568 // chromatin modificat	0005634 // nucleus // inferred from electronic annotation /// 0005737 // cytoplasm // inferred from direct assay /// 0005737 // cytoplasm // inferred from electronic annotation	0004668 // protein-arginine deiminase activity // inferred from electronic annotation /// 0004668 // protein-arginine deiminase activity // traceable author statement /// 0005509 // calcium ion binding // inferred from electronic annotation /// 0016787 //	---
202336_s_at	peptidylglycine alpha-amidating monooxygenase	PAM	471.767	364.75	185.915	100	550.333	546.45	50.923	100	-0.3	-1.23114	16.6667	63.8889	0.243091	0.00950844	0.0809101	0.00216333	19.4444	46.6667	93.3333	chr5q14-q21	0006464 // protein modification process // traceable author statement /// 0006518 // peptide metabolic process // non-traceable author statement /// 0006518 // peptide metabolic process // inferred from electronic annotation /// 0007076 // mitotic chromos	0000790 // nuclear chromatin // inferred from direct assay /// 0000793 // condensed chromosome // inferred from direct assay /// 0005576 // extracellular region // inferred from electronic annotation /// 0016020 // membrane // inferred from electronic ann	0003682 // chromatin binding // inferred from direct assay /// 0003824 // catalytic activity // inferred from electronic annotation /// 0004497 // monooxygenase activity // inferred from electronic annotation /// 0004504 // peptidylglycine monooxygenase a	---
213263_s_at	poly(rC) binding protein 2	PCBP2	297.967	295.4	38.2872	100	424.85	447.3	92.4306	100	-0.347222	-1.27211	11.1111	61.1111	0.0405505	0.00190958	0.00258141	0.0216684	27.7778	46.6667	53.3333	chr12q13.12-q13.13	0008380 // RNA splicing // not recorded /// 0009615 // response to virus // inferred from electronic annotation /// 0016071 // mRNA metabolic process // non-traceable author statement /// 0043161 // proteasomal ubiquitin-dependent protein catabolic proces	0005634 // nucleus // non-traceable author statement /// 0005634 // nucleus // inferred from electronic annotation /// 0005737 // cytoplasm // inferred from direct assay /// 0005737 // cytoplasm // non-traceable author statement /// 0005737 // cytoplasm /	0003677 // DNA binding // inferred from electronic annotation /// 0003723 // RNA binding // inferred from direct assay /// 0003723 // RNA binding // inferred from electronic annotation /// 0005515 // protein binding // inferred from physical interaction /	---
208690_s_at	PDZ and LIM domain 1	PDLIM1	72.1833	57.2	44.197	83.3333	121.033	121.15	37.9055	100	-0.836111	-1.78523	2.77778	61.1111	0.0525238	1.43711e-05	0.00120851	1.04666e-05	36.1111	53.3333	86.6667	chr10q23.1	0001666 // response to hypoxia // inferred from electronic annotation /// 0006979 // response to oxidative stress // traceable author statement /// 0045449 // regulation of transcription // inferred from electronic annotation	0005667 // transcription factor complex // inferred from electronic annotation /// 0005737 // cytoplasm // inferred from electronic annotation /// 0005856 // cytoskeleton // inferred from electronic annotation	0003713 // transcription coactivator activity // inferred from electronic annotation /// 0005515 // protein binding // inferred from electronic annotation /// 0008270 // zinc ion binding // inferred from electronic annotation /// 0046872 // metal ion bind	---
220865_s_at	prenyl (decaprenyl) diphosphate synthase, subunit 1	PDSS1	297.583	310.85	53.2211	100	217.567	221.7	37.8342	100	0.469444	1.38458	61.1111	0	0.0293637	1.05413e-09	1.07054e-07	2.75459e-07	38.8889	73.3333	66.6667	chr10p12.1	0006744 // ubiquinone biosynthetic process // inferred from direct assay /// 0006744 // ubiquinone biosynthetic process // inferred from electronic annotation /// 0008299 // isoprenoid biosynthetic process // inferred from direct assay /// 0008299 // isop	0005739 // mitochondrion // inferred from electronic annotation	0000010 // trans-hexaprenyltranstransferase activity // inferred from direct assay /// 0000010 // trans-hexaprenyltranstransferase activity // inferred from electronic annotation /// 0016740 // transferase activity // inferred from electronic annotation /	---
205251_at	period homolog 2 (Drosophila)	PER2	352.75	347.1	30.5718	100	265.75	256.45	47.094	100	0.458333	1.37395	66.6667	0	0.00807785	7.6278e-12	4.39493e-12	5.75317e-07	33.3333	93.3333	60	chr2q37.3	0006350 // transcription // inferred from electronic annotation /// 0006355 // regulation of transcription, DNA-dependent // inferred from electronic annotation /// 0007165 // signal transduction // inferred from electronic annotation /// 0007623 // circa	0005634 // nucleus // inferred from electronic annotation /// 0005737 // cytoplasm // inferred from electronic annotation	0004871 // signal transducer activity // inferred from electronic annotation /// 0005515 // protein binding // inferred from physical interaction /// 0005515 // protein binding // inferred from electronic annotation	Circadian_Exercise // GenMAPP
215236_s_at	phosphatidylinositol binding clathrin assembly protein	PICALM	238.717	212.8	90.1547	100	164.1	149.8	46.3311	100	0.530556	1.44449	61.1111	2.77778	0.107891	0.000575859	0.00624772	0.00211784	36.1111	26.6667	46.6667	chr11q14	0006461 // protein complex assembly // traceable author statement /// 0006897 // endocytosis // inferred from electronic annotation /// 0006898 // receptor-mediated endocytosis // inferred from direct assay /// 0006898 // receptor-mediated endocytosis //	0005622 // intracellular // inferred from electronic annotation /// 0005634 // nucleus // inferred from direct assay /// 0005794 // Golgi apparatus // inferred from electronic annotation /// 0005886 // plasma membrane // inferred from direct assay /// 000	0005515 // protein binding // inferred from physical interaction /// 0005543 // phospholipid binding // inferred from electronic annotation /// 0005545 // phosphatidylinositol binding // inferred from sequence or structural similarity /// 0005545 // phosp	---
203470_s_at	pleckstrin	PLEK	1065.73	797.6	542.791	100	1427.75	1360.15	234.81	100	-0.502778	-1.41694	13.8889	61.1111	0.129856	0.000406025	0.0104719	0.000256138	25	13.3333	60	chr2p13.3	0002244 // hemopoietic progenitor cell differentiation // inferred from expression pattern /// 0002576 // platelet degranulation // inferred from expression pattern /// 0006904 // vesicle docking involved in exocytosis // inferred from sequence or structu	0005576 // extracellular region // not recorded /// 0005624 // membrane fraction // inferred from direct assay /// 0005625 // soluble fraction // inferred from direct assay /// 0005737 // cytoplasm // inferred from direct assay /// 0005829 // cytosol // n	0005080 // protein kinase C binding // inferred from direct assay /// 0005515 // protein binding // inferred from physical interaction /// 0042803 // protein homodimerization activity // inferred from direct assay /// 0043325 // phosphatidylinositol-3,4-b	---
230120_s_at	plasminogen-like B2	PLGLB2	35.5667	29.7	20.6575	83.3333	62.3167	63.6	28.7176	83.3333	-0.919444	-1.89139	8.33333	61.1111	0.119019	0.00218394	0.0111061	0.0113426	30.5556	40	40	chr2p11.2	---	0005576 // extracellular region // inferred from electronic annotation	---	---
208890_s_at	plexin B2	PLXNB2	1978.35	2089.9	236.782	100	2628.8	2716.5	216.215	100	-0.444444	-1.36079	0	75	0.00230256	1.43159e-11	1.03093e-07	6.23935e-10	25	60	80	chr22q13.33	0007165 // signal transduction // inferred from electronic annotation /// 0007275 // multicellular organismal development // inferred from electronic annotation /// 0050772 // positive regulation of axonogenesis // inferred from electronic annotation ///	0005622 // intracellular // inferred from electronic annotation /// 0016020 // membrane // inferred from electronic annotation /// 0016021 // integral to membrane // inferred from electronic annotation	0004872 // receptor activity // inferred from electronic annotation /// 0005096 // GTPase activator activity // inferred from electronic annotation /// 0005515 // protein binding // inferred from physical interaction /// 0005515 // protein binding // infe	---
239392_s_at	pogo transposable element with KRAB domain	POGK	346.35	325.9	59.0106	100	402.5	407.2	128.657	100	-0.247222	-1.18692	16.6667	61.1111	0.663681	0.101409	0.0686951	0.253163	22.2222	86.6667	46.6667	chr1q24.1	0006355 // regulation of transcription, DNA-dependent // inferred from electronic annotation /// 0006916 // anti-apoptosis // non-traceable author statement /// 0007275 // multicellular organismal development // inferred from electronic annotation /// 004	0005622 // intracellular // inferred from electronic annotation /// 0005634 // nucleus // inferred from electronic annotation	0003676 // nucleic acid binding // inferred from electronic annotation /// 0003677 // DNA binding // inferred from electronic annotation	---
219317_at	polymerase (DNA directed) iota	POLI	301.783	278.4	82.6746	100	224.267	223.3	46.1055	100	0.472222	1.38724	63.8889	2.77778	0.091847	1.2051e-06	0.000216165	7.18917e-06	33.3333	60	80	chr18q21.1	0006260 // DNA replication // inferred from electronic annotation /// 0006281 // DNA repair // inferred from electronic annotation /// 0006281 // DNA repair // traceable author statement /// 0006974 // response to DNA damage stimulus // inferred from elec	0005622 // intracellular // inferred from direct assay /// 0005634 // nucleus // inferred from direct assay /// 0005634 // nucleus // inferred from electronic annotation /// 0005654 // nucleoplasm // traceable author statement /// 0043231 // intracellular	0003677 // DNA binding // inferred from electronic annotation /// 0003684 // damaged DNA binding // inferred from electronic annotation /// 0003887 // DNA-directed DNA polymerase activity // inferred from electronic annotation /// 0003887 // DNA-directed	---
228343_at	POU class 2 homeobox 2	POU2F2	215.317	215.8	76.8405	100	328.717	281.6	102.865	100	-0.608333	-1.5245	2.77778	61.1111	0.0661237	9.02746e-05	0.00250626	0.000270549	36.1111	33.3333	40	chr19q13.2	0002335 // mature B cell differentiation // inferred from electronic annotation /// 0002380 // immunoglobulin secretion involved in immune response // inferred from electronic annotation /// 0006350 // transcription // inferred from electronic annotation	0005634 // nucleus // inferred from direct assay /// 0005634 // nucleus // inferred from electronic annotation /// 0005634 // nucleus // non-traceable author statement /// 0005737 // cytoplasm // inferred from electronic annotation	0003677 // DNA binding // inferred from electronic annotation /// 0003677 // DNA binding // non-traceable author statement /// 0003700 // sequence-specific DNA binding transcription factor activity // inferred from electronic annotation /// 0003700 // seq	---
209296_at	protein phosphatase, Mg2+/Mn2+ dependent, 1B	PPM1B	1290.2	1013.65	606.338	100	807.683	808.45	148.768	100	0.588889	1.50409	63.8889	2.77778	0.0691773	4.44313e-05	0.00310067	3.47622e-05	33.3333	26.6667	46.6667	chr2p21	0006470 // protein dephosphorylation // inferred from electronic annotation /// 0006470 // protein dephosphorylation // traceable author statement	0008287 // protein serine/threonine phosphatase complex // inferred from electronic annotation	0000287 // magnesium ion binding // inferred from electronic annotation /// 0003824 // catalytic activity // inferred from electronic annotation /// 0004721 // phosphoprotein phosphatase activity // inferred from electronic annotation /// 0004722 // prote	---
206279_at	protein kinase, Y-linked	PRKY	35.9333	33.65	15.0719	83.3333	79.7667	101.3	35.8626	83.3333	-0.863889	-1.81994	2.77778	63.8889	0.0542202	1.77477e-06	6.0257e-06	0.000279576	33.3333	80	53.3333	chrYp11.2	0006468 // protein phosphorylation // inferred from electronic annotation /// 0006468 // protein phosphorylation // traceable author statement	---	0000166 // nucleotide binding // inferred from electronic annotation /// 0004672 // protein kinase activity // inferred from electronic annotation /// 0004674 // protein serine/threonine kinase activity // inferred from electronic annotation /// 0004674 /	---
225796_at	PX domain containing serine/threonine kinase	PXK	597.483	605.95	62.1283	100	453.967	422.65	97.4539	100	0.466667	1.38191	61.1111	0	0.0268787	5.33416e-10	1.29173e-09	2.95804e-06	38.8889	80	40	chr3p14.3	0006468 // protein phosphorylation // non-traceable author statement /// 0006468 // protein phosphorylation // inferred from electronic annotation /// 0006954 // inflammatory response // inferred from mutant phenotype /// 0007154 // cell communication //	0005634 // nucleus // inferred from direct assay /// 0005737 // cytoplasm // inferred from direct assay /// 0005737 // cytoplasm // inferred from sequence or structural similarity /// 0005737 // cytoplasm // inferred from electronic annotation /// 0005886	0000166 // nucleotide binding // non-traceable author statement /// 0003779 // actin binding // inferred from electronic annotation /// 0004672 // protein kinase activity // non-traceable author statement /// 0004672 // protein kinase activity // inferred	---
222846_at	RAB8B, member RAS oncogene family	RAB8B	496.067	354.7	228.427	100	288.65	252.65	67.0051	100	0.65	1.56917	61.1111	2.77778	0.0491605	1.66948e-05	0.00212087	1.12766e-05	36.1111	40	66.6667	chr15q22.2	0006810 // transport // inferred from electronic annotation /// 0007264 // small GTPase mediated signal transduction // inferred from electronic annotation /// 0015031 // protein transport // non-traceable author statement /// 0015031 // protein transport	0005625 // soluble fraction // inferred from electronic annotation /// 0005626 // insoluble fraction // inferred from electronic annotation /// 0005739 // mitochondrion // inferred from electronic annotation /// 0005886 // plasma membrane // inferred from	0000166 // nucleotide binding // inferred from electronic annotation /// 0003924 // GTPase activity // non-traceable author statement /// 0005515 // protein binding // inferred from physical interaction /// 0005515 // protein binding // inferred from elec	---
215342_s_at	RAB GTPase activating protein 1-like	RABGAP1L	216.383	223.55	44.0387	100	505.883	507.9	151.942	100	-1.16667	-2.24492	0	88.8889	0.001012	4.39909e-14	2.18879e-11	6.46965e-10	11.1111	53.3333	40	chr1q24	0032313 // regulation of Rab GTPase activity // inferred from electronic annotation /// 0032880 // regulation of protein localization // inferred from direct assay	0005622 // intracellular // inferred from electronic annotation /// 0005634 // nucleus // inferred from direct assay /// 0005769 // early endosome // inferred from direct assay /// 0005794 // Golgi apparatus // inferred from direct assay	0005096 // GTPase activator activity // inferred from electronic annotation /// 0005097 // Rab GTPase activator activity // inferred from direct assay /// 0005097 // Rab GTPase activator activity // inferred from electronic annotation	---
1554999_at	RasGEF domain family, member 1B	RASGEF1B	64.1333	45.15	50.5623	66.6667	177.2	131.05	175.77	66.6667	-1.10556	-2.15182	19.4444	63.8889	0.465865	0.0816246	0.102419	0.189339	16.6667	26.6667	6.66667	chr4q21.21	0007264 // small GTPase mediated signal transduction // inferred from electronic annotation /// 0051056 // regulation of small GTPase mediated signal transduction // inferred from electronic annotation	0005622 // intracellular // inferred from electronic annotation	0005085 // guanyl-nucleotide exchange factor activity // inferred from electronic annotation /// 0005088 // Ras guanyl-nucleotide exchange factor activity // inferred from direct assay	---
200885_at	ras homolog gene family, member C	RHOC	169.317	162.85	46.4585	100	360	352.35	98.1661	100	-1.08333	-2.11893	0	83.3333	0.00156401	3.69608e-14	8.56069e-10	8.73118e-12	16.6667	66.6667	33.3333	chr1p13.1	0007264 // small GTPase mediated signal transduction // inferred from electronic annotation /// 0043123 // positive regulation of I-kappaB kinase/NF-kappaB cascade // inferred from mutant phenotype	0005622 // intracellular // inferred from electronic annotation /// 0005886 // plasma membrane // not recorded /// 0005886 // plasma membrane // inferred from electronic annotation /// 0016020 // membrane // inferred from electronic annotation	0000166 // nucleotide binding // inferred from electronic annotation /// 0003924 // GTPase activity // traceable author statement /// 0004871 // signal transducer activity // inferred from mutant phenotype /// 0005515 // protein binding // inferred from p	---
209545_s_at	receptor-interacting serine-threonine kinase 2	RIPK2	596.267	543.85	144.064	100	855.117	777	308.242	100	-0.508333	-1.42241	8.33333	61.1111	0.087868	0.000152719	0.000382764	0.00338564	30.5556	66.6667	26.6667	chr8q21	0001961 // positive regulation of cytokine-mediated signaling pathway // inferred from electronic annotation /// 0002827 // positive regulation of T-helper 1 type immune response // inferred from electronic annotation /// 0006468 // protein phosphorylatio	0005622 // intracellular // inferred from electronic annotation /// 0005737 // cytoplasm // inferred from electronic annotation /// 0005829 // cytosol // not recorded	0000166 // nucleotide binding // inferred from electronic annotation /// 0004672 // protein kinase activity // inferred from electronic annotation /// 0004674 // protein serine/threonine kinase activity // not recorded /// 0004674 // protein serine/threon	---
218979_at	RMI1, RecQ mediated genome instability 1, homolog (S. cerevisiae)	RMI1	387.55	340	130.145	100	258.35	244.45	98.638	100	0.608333	1.5245	63.8889	13.8889	0.0852741	0.000193765	0.000435399	0.00463025	22.2222	33.3333	26.6667	chr9q21.32	0006260 // DNA replication // inferred from electronic annotation	0005634 // nucleus // inferred from electronic annotation	---	---
1568665_at	ring finger protein 103	RNF103	105.533	108.25	29.0712	100	217.5	200.05	115.544	83.3333	-0.738889	-1.66889	13.8889	61.1111	0.157518	0.00489077	0.00459023	0.0404755	25	66.6667	40	chr2p11.2	0007417 // central nervous system development // traceable author statement /// 0016567 // protein ubiquitination // inferred from direct assay /// 0030433 // ER-associated protein catabolic process // inferred from direct assay	0005783 // endoplasmic reticulum // inferred from direct assay /// 0005783 // endoplasmic reticulum // inferred from electronic annotation /// 0005789 // endoplasmic reticulum membrane // inferred from electronic annotation /// 0016020 // membrane // infe	0004842 // ubiquitin-protein ligase activity // inferred from direct assay /// 0005515 // protein binding // inferred from physical interaction /// 0005515 // protein binding // inferred from electronic annotation /// 0008270 // zinc ion binding // inferr	---
225414_at	ring finger protein 149	RNF149	3407.8	3397.85	344.011	100	2481.55	2273.85	552.347	100	0.483333	1.39797	83.3333	0	0.0111524	7.40129e-11	2.55025e-10	1.20217e-06	16.6667	93.3333	66.6667	chr2q11.2	---	0016020 // membrane // inferred from electronic annotation /// 0016021 // integral to membrane // inferred from electronic annotation	0005515 // protein binding // inferred from electronic annotation /// 0008270 // zinc ion binding // inferred from electronic annotation /// 0016874 // ligase activity // inferred from electronic annotation /// 0046872 // metal ion binding // inferred fro	---
218394_at	rogdi homolog (Drosophila)	ROGDI	408.8	384.1	96.3199	100	595.617	583.25	143.926	100	-0.586111	-1.50119	0	61.1111	0.0314373	6.89692e-08	4.52094e-06	4.83554e-06	38.8889	60	46.6667	chr16p13.3	0008284 // positive regulation of cell proliferation // inferred from electronic annotation /// 0030097 // hemopoiesis // inferred from electronic annotation	0005622 // intracellular // inferred from direct assay	---	---
217753_s_at	ribosomal protein S26	RPS26	5177.62	4597.25	1092.59	100	7633.62	8166.6	2327.91	100	-0.563889	-1.47825	11.1111	66.6667	0.0749483	0.000782976	0.00152858	0.0102144	22.2222	26.6667	33.3333	chr12q13	0006412 // translation // inferred by curator /// 0006412 // translation // inferred from electronic annotation /// 0006414 // translational elongation // not recorded /// 0033119 // negative regulation of RNA splicing // inferred from direct assay	0005622 // intracellular // inferred from electronic annotation /// 0005829 // cytosol // not recorded /// 0005840 // ribosome // inferred from electronic annotation /// 0015935 // small ribosomal subunit // inferred from direct assay /// 0022627 // cytos	0003729 // mRNA binding // inferred from direct assay /// 0003735 // structural constituent of ribosome // inferred from electronic annotation /// 0005515 // protein binding // inferred from physical interaction	Ribosomal_Proteins // GenMAPP /// Ribosomal_Proteins // GenMAPP /// Ribosomal_Proteins // GenMAPP
201909_at	ribosomal protein S4, Y-linked 1	RPS4Y1	403.917	13.9	878.992	16.6667	2573.75	3393.15	1882.39	66.6667	-4.33889	-20.2365	5.55556	66.6667	0.0878596	0.000817681	0.0021463	0.00875896	27.7778	66.6667	40	chrYp11.3	0006412 // translation // inferred from mutant phenotype /// 0006412 // translation // inferred from electronic annotation /// 0006412 // translation // traceable author statement /// 0006414 // translational elongation // not recorded /// 0007275 // mult	0005622 // intracellular // inferred from electronic annotation /// 0005829 // cytosol // not recorded /// 0005840 // ribosome // inferred from electronic annotation /// 0005844 // polysome // inferred from direct assay /// 0022627 // cytosolic small ribo	0003723 // RNA binding // traceable author statement /// 0003723 // RNA binding // inferred from electronic annotation /// 0003735 // structural constituent of ribosome // inferred from mutant phenotype /// 0003735 // structural constituent of ribosome //	Ribosomal_Proteins // GenMAPP
209360_s_at	runt-related transcription factor 1	RUNX1	521.583	508.95	94.2181	100	345.733	329.35	34.0803	100	0.533333	1.44727	75	0	0.00211883	1.48117e-13	2.07714e-10	8.35562e-11	25	86.6667	93.3333	chr21q22.3	0001501 // skeletal system development // inferred from electronic annotation /// 0001701 // in utero embryonic development // inferred from electronic annotation /// 0001889 // liver development // inferred from electronic annotation /// 0006350 // trans	0005634 // nucleus // inferred from direct assay /// 0005634 // nucleus // traceable author statement /// 0005634 // nucleus // inferred from electronic annotation /// 0043231 // intracellular membrane-bounded organelle // inferred from direct assay	0003677 // DNA binding // inferred from direct assay /// 0003677 // DNA binding // inferred from electronic annotation /// 0003700 // sequence-specific DNA binding transcription factor activity // inferred from direct assay /// 0003700 // sequence-specifi	---
204198_s_at	runt-related transcription factor 3	RUNX3	242.317	235.6	39.7521	100	385.583	371	103.079	100	-0.588889	-1.50409	2.77778	66.6667	0.0139715	2.90162e-06	5.54898e-05	0.000123961	30.5556	53.3333	40	chr1p36	0006350 // transcription // inferred from electronic annotation /// 0006355 // regulation of transcription, DNA-dependent // non-traceable author statement /// 0006355 // regulation of transcription, DNA-dependent // inferred from electronic annotation //	0005634 // nucleus // non-traceable author statement /// 0005634 // nucleus // inferred from electronic annotation	0003677 // DNA binding // inferred from electronic annotation /// 0003700 // sequence-specific DNA binding transcription factor activity // inferred from electronic annotation /// 0003700 // sequence-specific DNA binding transcription factor activity // t	TGF_Beta_Signaling_Pathway // GenMAPP
204351_at	S100 calcium binding protein P	S100P	959.05	888.65	321.487	100	278.55	287.95	94.1777	100	1.83056	3.55674	100	0	0.000603305	7.33012e-14	2.2745e-13	2.85883e-08	0	26.6667	33.3333	chr4p16	0043542 // endothelial cell migration // inferred from mutant phenotype	0005634 // nucleus // inferred from direct assay /// 0005634 // nucleus // inferred from electronic annotation /// 0005737 // cytoplasm // traceable author statement /// 0005737 // cytoplasm // inferred from electronic annotation	0000287 // magnesium ion binding // traceable author statement /// 0005509 // calcium ion binding // inferred from electronic annotation /// 0005509 // calcium ion binding // traceable author statement /// 0005515 // protein binding // inferred from physi	---
220330_s_at	SAM domain, SH3 domain and nuclear localization signals 1	SAMSN1	3316.82	2786.5	1631.13	100	1875.87	1776.15	603.459	100	0.719444	1.64655	75	8.33333	0.0665623	3.83359e-05	0.00137937	0.000157385	16.6667	6.66667	40	chr21q11	---	---	0001784 // phosphotyrosine binding // inferred from direct assay /// 0005515 // protein binding // inferred from physical interaction	---
1555638_a_at	SAM domain, SH3 domain and nuclear localization signals 1	SAMSN1	1042.57	950.95	492.832	100	596.633	527.75	182.68	100	0.708333	1.63392	66.6667	8.33333	0.0738957	0.000142864	0.0034941	0.000466826	25	6.66667	40	chr21q11	---	---	0001784 // phosphotyrosine binding // inferred from direct assay /// 0005515 // protein binding // inferred from physical interaction	---
204900_x_at	Sin3A-associated protein, 30kDa	SAP30	2737.33	1985.85	1831.02	100	979	988.25	200.912	100	1.1	2.14355	66.6667	0	0.0524999	3.0661e-06	0.00103513	4.4215e-07	33.3333	26.6667	66.6667	chr4q34.1	0000122 // negative regulation of transcription from RNA polymerase II promoter // inferred from electronic annotation /// 0006350 // transcription // inferred from electronic annotation /// 0045449 // regulation of transcription // inferred from direct a	0000118 // histone deacetylase complex // inferred from direct assay /// 0005634 // nucleus // inferred from electronic annotation	0003677 // DNA binding // inferred from electronic annotation /// 0003714 // transcription corepressor activity // inferred from direct assay /// 0005515 // protein binding // inferred from physical interaction /// 0005515 // protein binding // inferred f	---
204899_s_at	Sin3A-associated protein, 30kDa	SAP30	330.2	262.45	228.573	100	115.867	115.2	37.4336	100	1.17778	2.26228	61.1111	5.55556	0.0409587	7.31952e-05	0.00410583	3.99426e-05	33.3333	13.3333	60	chr4q34.1	0000122 // negative regulation of transcription from RNA polymerase II promoter // inferred from electronic annotation /// 0006350 // transcription // inferred from electronic annotation /// 0045449 // regulation of transcription // inferred from direct a	0000118 // histone deacetylase complex // inferred from direct assay /// 0005634 // nucleus // inferred from electronic annotation	0003677 // DNA binding // inferred from electronic annotation /// 0003714 // transcription corepressor activity // inferred from direct assay /// 0005515 // protein binding // inferred from physical interaction /// 0005515 // protein binding // inferred f	---
205241_at	SCO cytochrome oxidase deficient homolog 2 (yeast)	SCO2	1887.3	1950.2	468.461	100	2875.33	2832.8	1194.54	100	-0.555556	-1.46973	13.8889	61.1111	0.195332	0.00185554	0.00257896	0.0197063	25	26.6667	26.6667	chr22q13.33	0006825 // copper ion transport // inferred from electronic annotation /// 0006878 // cellular copper ion homeostasis // inferred from electronic annotation /// 0008535 // respiratory chain complex IV assembly // inferred from electronic annotation /// 00	0005739 // mitochondrion // traceable author statement /// 0005739 // mitochondrion // inferred from electronic annotation /// 0005743 // mitochondrial inner membrane // inferred from electronic annotation	0005507 // copper ion binding // non-traceable author statement /// 0005507 // copper ion binding // inferred from electronic annotation /// 0046872 // metal ion binding // inferred from electronic annotation	---
212314_at	sel-1 suppressor of lin-12-like 3 (C. elegans)	SEL1L3	135.15	113.2	50.0721	100	84.8833	53.9	61.5811	100	0.852778	1.80597	66.6667	25	0.0963042	0.00137734	0.00113189	0.0200274	8.33333	53.3333	33.3333	chr4p15.2	---	0016020 // membrane // inferred from electronic annotation /// 0016021 // integral to membrane // inferred from electronic annotation	0005488 // binding // inferred from electronic annotation	---
201307_at	septin 11	SEPT11	103.433	106.2	37.7386	100	130.383	132.55	34.849	100	-0.563889	-1.47825	5.55556	61.1111	0.256538	4.48571e-05	0.00184716	0.000124387	33.3333	73.3333	40	chr4q21.1	0007049 // cell cycle // inferred from electronic annotation /// 0051291 // protein heterooligomerization // inferred from direct assay /// 0051301 // cell division // inferred from electronic annotation	0001725 // stress fiber // inferred from direct assay /// 0005737 // cytoplasm // inferred from electronic annotation /// 0005856 // cytoskeleton // inferred from electronic annotation /// 0030054 // cell junction // inferred from electronic annotation //	0000166 // nucleotide binding // inferred from electronic annotation /// 0005515 // protein binding // inferred from physical interaction /// 0005515 // protein binding // inferred from electronic annotation /// 0005525 // GTP binding // inferred from ele	---
208657_s_at	septin 9	SEPT9	278.9	278.35	27.9089	100	412.717	391.9	70.649	100	-0.594444	-1.50989	0	63.8889	0.00191594	1.28327e-15	5.98675e-14	1.20211e-09	36.1111	93.3333	60	chr17q25	0007049 // cell cycle // inferred from electronic annotation /// 0051291 // protein heterooligomerization // inferred from direct assay /// 0051301 // cell division // inferred from electronic annotation	0001725 // stress fiber // inferred from direct assay /// 0005737 // cytoplasm // inferred from electronic annotation /// 0005737 // cytoplasm // traceable author statement /// 0005856 // cytoskeleton // inferred from electronic annotation /// 0005874 //	0000166 // nucleotide binding // inferred from electronic annotation /// 0003924 // GTPase activity // traceable author statement /// 0005515 // protein binding // inferred from physical interaction /// 0005525 // GTP binding // inferred from electronic a	---
228726_at	serpin peptidase inhibitor, clade B (ovalbumin), member 1	SERPINB1	2554.02	2531	221.7	100	1695.93	1705.45	297.078	100	0.569444	1.48395	77.7778	0	0.0016527	2.21955e-17	1.0557e-17	2.63932e-09	22.2222	100	80	chr6p25	---	0005615 // extracellular space // inferred from direct assay /// 0005737 // cytoplasm // non-traceable author statement /// 0005737 // cytoplasm // inferred from electronic annotation	0004867 // serine-type endopeptidase inhibitor activity // non-traceable author statement /// 0004867 // serine-type endopeptidase inhibitor activity // inferred from electronic annotation /// 0030414 // peptidase inhibitor activity // inferred from elect	---
204614_at	serpin peptidase inhibitor, clade B (ovalbumin), member 2	SERPINB2	337.75	334.4	143.208	100	111.85	84.75	46.5865	100	1.49167	2.81214	86.1111	2.77778	0.0024006	5.59712e-11	3.19438e-08	2.50021e-08	11.1111	26.6667	46.6667	chr18q21.3	0006916 // anti-apoptosis // traceable author statement /// 0042060 // wound healing // inferred from electronic annotation	0005576 // extracellular region // inferred from electronic annotation /// 0005615 // extracellular space // inferred from electronic annotation /// 0005737 // cytoplasm // inferred from electronic annotation	0004252 // serine-type endopeptidase activity // inferred from electronic annotation /// 0004867 // serine-type endopeptidase inhibitor activity // inferred from electronic annotation /// 0030414 // peptidase inhibitor activity // inferred from electronic	Blood_Clotting_Cascade // GenMAPP
227038_at	sphingomyelin synthase 2	SGMS2	1935.15	1846	431.928	100	1222.47	1138.45	282.768	100	0.619444	1.53628	69.4444	2.77778	0.00828185	1.75838e-08	5.30282e-07	3.79667e-06	27.7778	73.3333	40	chr4q25	0006629 // lipid metabolic process // inferred from electronic annotation /// 0006665 // sphingolipid metabolic process // inferred from electronic annotation /// 0006686 // sphingomyelin biosynthetic process // inferred from direct assay	0000139 // Golgi membrane // inferred from electronic annotation /// 0005794 // Golgi apparatus // inferred from direct assay /// 0005794 // Golgi apparatus // inferred from electronic annotation /// 0005886 // plasma membrane // inferred from electronic	0003824 // catalytic activity // inferred from electronic annotation /// 0016301 // kinase activity // inferred from electronic annotation /// 0016740 // transferase activity // inferred from electronic annotation /// 0033188 // sphingomyelin synthase act	---
225589_at	SH3 domain containing ring finger 1	SH3RF1	75.7167	78.05	15.2835	100	113.717	110.95	45.6719	100	-0.6	-1.51572	5.55556	61.1111	0.212414	0.000168695	0.000214287	0.00490204	33.3333	46.6667	26.6667	chr4q32.3	0006917 // induction of apoptosis // inferred from electronic annotation /// 0046328 // regulation of JNK cascade // inferred from electronic annotation	0005737 // cytoplasm // inferred from electronic annotation /// 0005794 // Golgi apparatus // inferred from electronic annotation /// 0030027 // lamellipodium // inferred from electronic annotation /// 0042995 // cell projection // inferred from electroni	0005078 // MAP-kinase scaffold activity // inferred from electronic annotation /// 0005515 // protein binding // inferred from physical interaction /// 0005515 // protein binding // inferred from electronic annotation /// 0008270 // zinc ion binding // in	G13_Signaling_Pathway // GenMAPP
208078_s_at	salt-inducible kinase 1	SIK1	212.95	222	92.6549	100	607.533	442.2	423.753	100	-1.40833	-2.6543	11.1111	83.3333	0.0371018	9.0216e-07	4.89269e-06	0.000139323	5.55556	33.3333	20	chr21q22.3	0000122 // negative regulation of transcription from RNA polymerase II promoter // inferred from electronic annotation /// 0000122 // negative regulation of transcription from RNA polymerase II promoter // traceable author statement /// 0006350 // transcr	0005622 // intracellular // inferred from electronic annotation /// 0005634 // nucleus // inferred from direct assay /// 0005634 // nucleus // inferred from electronic annotation /// 0005667 // transcription factor complex // inferred from electronic anno	0000166 // nucleotide binding // inferred from electronic annotation /// 0000287 // magnesium ion binding // inferred from direct assay /// 0000287 // magnesium ion binding // inferred from sequence or structural similarity /// 0000287 // magnesium ion bi	Hypertrophy_model // GenMAPP
203761_at	Src-like-adaptor	SLA	1978.72	1631.95	1195.95	100	965.85	937.55	175.787	100	0.872222	1.83048	77.7778	2.77778	0.0479534	2.27311e-06	0.000793957	5.56109e-07	19.4444	13.3333	40	chr8q22.3-qter|8q24	---	0005737 // cytoplasm // inferred from electronic annotation /// 0005768 // endosome // inferred from electronic annotation	0005070 // SH3/SH2 adaptor activity // traceable author statement /// 0005515 // protein binding // inferred from electronic annotation	---
218041_x_at	solute carrier family 38, member 2	SLC38A2	2135.93	2090.3	293.324	100	1506.57	1427.5	187.133	100	0.466667	1.38191	75	0	0.00182169	2.19112e-10	3.37508e-07	2.42308e-08	25	66.6667	46.6667	chr12q	0006810 // transport // inferred from electronic annotation /// 0006811 // ion transport // inferred from electronic annotation /// 0006814 // sodium ion transport // inferred from electronic annotation /// 0006865 // amino acid transport // not recorded	0005886 // plasma membrane // not recorded /// 0005886 // plasma membrane // inferred from electronic annotation /// 0016020 // membrane // inferred from electronic annotation /// 0016021 // integral to membrane // inferred from electronic annotation	0015171 // amino acid transmembrane transporter activity // not recorded /// 0015171 // amino acid transmembrane transporter activity // inferred from electronic annotation /// 0015293 // symporter activity // inferred from electronic annotation	---
220924_s_at	solute carrier family 38, member 2	SLC38A2	1904.57	1852.2	242.2	100	1313.12	1244.95	159.814	100	0.480556	1.39528	72.2222	0	0.000735439	2.08218e-12	1.90244e-08	4.60544e-10	27.7778	66.6667	46.6667	chr12q	0006810 // transport // inferred from electronic annotation /// 0006811 // ion transport // inferred from electronic annotation /// 0006814 // sodium ion transport // inferred from electronic annotation /// 0006865 // amino acid transport // not recorded	0005886 // plasma membrane // not recorded /// 0005886 // plasma membrane // inferred from electronic annotation /// 0016020 // membrane // inferred from electronic annotation /// 0016021 // integral to membrane // inferred from electronic annotation	0015171 // amino acid transmembrane transporter activity // not recorded /// 0015171 // amino acid transmembrane transporter activity // inferred from electronic annotation /// 0015293 // symporter activity // inferred from electronic annotation	---
222982_x_at	solute carrier family 38, member 2	SLC38A2	3780.35	3512.05	728.647	100	2836.65	2704.35	304.154	100	0.427778	1.34516	63.8889	0	0.0209242	1.21303e-08	1.02838e-05	1.26442e-07	36.1111	53.3333	46.6667	chr12q	0006810 // transport // inferred from electronic annotation /// 0006811 // ion transport // inferred from electronic annotation /// 0006814 // sodium ion transport // inferred from electronic annotation /// 0006865 // amino acid transport // not recorded	0005886 // plasma membrane // not recorded /// 0005886 // plasma membrane // inferred from electronic annotation /// 0016020 // membrane // inferred from electronic annotation /// 0016021 // integral to membrane // inferred from electronic annotation	0015171 // amino acid transmembrane transporter activity // not recorded /// 0015171 // amino acid transmembrane transporter activity // inferred from electronic annotation /// 0015293 // symporter activity // inferred from electronic annotation	---
232636_at	SLIT and NTRK-like family, member 4	SLITRK4	252.467	275.9	62.7323	100	202.783	181	69.4125	100	0.302778	1.23352	63.8889	19.4444	0.265551	0.0265484	0.0526552	0.0731893	16.6667	66.6667	60	chrXq27.3	0007409 // axonogenesis // inferred from electronic annotation	0016020 // membrane // inferred from electronic annotation /// 0016021 // integral to membrane // inferred from electronic annotation	0005515 // protein binding // inferred from electronic annotation	---
227798_at	SMAD family member 1	SMAD1	420.817	418.45	34.4864	100	272.267	262.4	69.5421	100	0.544444	1.45846	69.4444	0	0.00996613	6.37059e-15	6.66421e-15	1.24433e-08	30.5556	100	60	chr4q31	0000165 // MAPKKK cascade // inferred from electronic annotation /// 0001657 // ureteric bud development // inferred from electronic annotation /// 0001710 // mesodermal cell fate commitment // inferred from electronic annotation /// 0001822 // kidney dev	0005622 // intracellular // non-traceable author statement /// 0005622 // intracellular // inferred from electronic annotation /// 0005634 // nucleus // inferred from direct assay /// 0005634 // nucleus // non-traceable author statement /// 0005634 // nuc	0003700 // sequence-specific DNA binding transcription factor activity // inferred from direct assay /// 0003700 // sequence-specific DNA binding transcription factor activity // inferred from electronic annotation /// 0003702 // RNA polymerase II transcr	TGF_Beta_Signaling_Pathway // GenMAPP
201996_s_at	spen homolog, transcriptional regulator (Drosophila)	SPEN	939.733	810.4	395.81	100	1447.4	1400.75	495.32	100	-0.694444	-1.61826	8.33333	66.6667	0.0898583	0.000456539	0.00546519	0.00158891	25	26.6667	26.6667	chr1p36	0006350 // transcription // inferred from electronic annotation /// 0006357 // regulation of transcription from RNA polymerase II promoter // inferred from electronic annotation /// 0007219 // Notch signaling pathway // inferred from electronic annotation	0005634 // nucleus // inferred from direct assay /// 0005634 // nucleus // inferred from electronic annotation /// 0005730 // nucleolus // inferred from direct assay	0000166 // nucleotide binding // inferred from electronic annotation /// 0003676 // nucleic acid binding // inferred from electronic annotation /// 0003677 // DNA binding // inferred from electronic annotation /// 0003697 // single-stranded DNA binding //	---
221753_at	slingshot homolog 1 (Drosophila)	SSH1	149.083	154.7	32.3596	100	213.633	228.6	36.6871	100	-0.602778	-1.51864	2.77778	63.8889	0.0251586	1.89706e-07	4.15653e-05	6.14864e-06	33.3333	46.6667	73.3333	chr12q24.11	0000902 // cell morphogenesis // inferred from mutant phenotype /// 0006470 // protein dephosphorylation // inferred from mutant phenotype /// 0006470 // protein dephosphorylation // inferred from electronic annotation /// 0016311 // dephosphorylation //	0005737 // cytoplasm // inferred from direct assay /// 0005737 // cytoplasm // inferred from electronic annotation /// 0005856 // cytoskeleton // inferred from electronic annotation /// 0005886 // plasma membrane // inferred from direct assay /// 0030027	0003779 // actin binding // inferred from direct assay /// 0003779 // actin binding // inferred from electronic annotation /// 0004721 // phosphoprotein phosphatase activity // inferred from direct assay /// 0004721 // phosphoprotein phosphatase activity	---
235334_at	ST6 (alpha-N-acetyl-neuraminyl-2,3-beta-galactosyl-1,3)-N-acetylgalactosaminide alpha-2,6-sialyltransferase 3	ST6GALNAC3	129.867	136.3	39.4653	100	64.7833	66.95	30.0313	83.3333	1.03611	2.05069	63.8889	5.55556	0.0469654	9.17901e-05	5.97648e-05	0.00457894	30.5556	40	26.6667	chr1p31.1	0006486 // protein glycosylation // inferred from electronic annotation	0000139 // Golgi membrane // inferred from electronic annotation /// 0005794 // Golgi apparatus // inferred from electronic annotation /// 0016020 // membrane // inferred from electronic annotation /// 0016021 // integral to membrane // inferred from elec	0008373 // sialyltransferase activity // inferred from electronic annotation /// 0016740 // transferase activity // inferred from electronic annotation /// 0016757 // transferase activity, transferring glycosyl groups // inferred from electronic annotatio	---
242943_at	ST8 alpha-N-acetyl-neuraminide alpha-2,8-sialyltransferase 4	ST8SIA4	824.15	768.5	305.869	100	581.517	603.95	151.562	100	0.383333	1.30435	63.8889	13.8889	0.246503	0.0214192	0.0855048	0.0262271	22.2222	26.6667	13.3333	chr5q21	0006464 // protein modification process // traceable author statement /// 0006486 // protein glycosylation // inferred from electronic annotation /// 0006491 // N-glycan processing // traceable author statement /// 0007399 // nervous system development //	0000139 // Golgi membrane // inferred from electronic annotation /// 0005794 // Golgi apparatus // inferred from electronic annotation /// 0016020 // membrane // inferred from electronic annotation /// 0016021 // integral to membrane // inferred from elec	0008373 // sialyltransferase activity // inferred from electronic annotation /// 0008373 // sialyltransferase activity // traceable author statement /// 0016740 // transferase activity // inferred from electronic annotation /// 0016757 // transferase acti	---
203767_s_at	steroid sulfatase (microsomal), isozyme S	STS	354.35	333.75	76.3837	100	237.683	248.9	35.8117	100	0.477778	1.3926	61.1111	0	0.00812101	7.11054e-06	0.000413312	9.76063e-05	38.8889	46.6667	40	chrXp22.32	0006629 // lipid metabolic process // inferred from electronic annotation /// 0006706 // steroid catabolic process // traceable author statement /// 0007565 // female pregnancy // inferred from electronic annotation /// 0007611 // learning or memory // in	0000299 // integral to membrane of membrane fraction // inferred from electronic annotation /// 0005624 // membrane fraction // traceable author statement /// 0005635 // nuclear envelope // inferred from electronic annotation /// 0005764 // lysosome // tr	0003824 // catalytic activity // inferred from electronic annotation /// 0004773 // steryl-sulfatase activity // inferred from electronic annotation /// 0004773 // steryl-sulfatase activity // traceable author statement /// 0008484 // sulfuric ester hydro	---
209238_at	syntaxin 3	STX3	611.967	616.8	85.3164	100	465.533	482.15	44.736	100	0.361111	1.28441	61.1111	0	0.00715961	2.03588e-08	9.78566e-06	2.17605e-07	38.8889	73.3333	73.3333	chr11q12.1	0006810 // transport // inferred from electronic annotation /// 0006836 // neurotransmitter transport // inferred from electronic annotation /// 0006886 // intracellular protein transport // inferred from electronic annotation /// 0006887 // exocytosis //	0001950 // plasma membrane enriched fraction // inferred from direct assay /// 0005773 // vacuole // traceable author statement /// 0005886 // plasma membrane // inferred from electronic annotation /// 0005911 // cell-cell junction // inferred from direct	0005484 // SNAP receptor activity // inferred from electronic annotation /// 0005515 // protein binding // inferred from physical interaction /// 0005515 // protein binding // inferred from electronic annotation /// 0050544 // arachidonic acid binding //	---
203615_x_at	sulfotransferase family, cytosolic, 1A, phenol-preferring, member 1	SULT1A1	3128.77	2997.75	852.861	100	4009.53	4003.4	699.789	100	-0.391667	-1.31191	8.33333	63.8889	0.0829261	0.00012308	0.00253623	0.000586821	27.7778	46.6667	53.3333	chr16p12.1	0006584 // catecholamine metabolic process // inferred from electronic annotation /// 0006629 // lipid metabolic process // inferred from electronic annotation /// 0006805 // xenobiotic metabolic process // inferred from direct assay /// 0008202 // steroi	0005737 // cytoplasm // inferred from electronic annotation	0004062 // aryl sulfotransferase activity // inferred from electronic annotation /// 0008146 // sulfotransferase activity // traceable author statement /// 0008146 // sulfotransferase activity // inferred from electronic annotation /// 0016740 // transfer	---
215299_x_at	sulfotransferase family, cytosolic, 1A, phenol-preferring, member 1	SULT1A1	2928.5	2764.65	810.394	100	3899.9	3722.95	879.481	100	-0.363889	-1.28689	8.33333	61.1111	0.0753191	0.000184542	0.00188735	0.00165241	30.5556	66.6667	46.6667	chr16p12.1	0006584 // catecholamine metabolic process // inferred from electronic annotation /// 0006629 // lipid metabolic process // inferred from electronic annotation /// 0006805 // xenobiotic metabolic process // inferred from direct assay /// 0008202 // steroi	0005737 // cytoplasm // inferred from electronic annotation	0004062 // aryl sulfotransferase activity // inferred from electronic annotation /// 0008146 // sulfotransferase activity // traceable author statement /// 0008146 // sulfotransferase activity // inferred from electronic annotation /// 0016740 // transfer	---
1556176_at	TAF8 RNA polymerase II, TATA box binding protein (TBP)-associated factor, 43kDa	TAF8	105.217	107.15	16.3344	100	71.4833	72.5	13.9223	100	0.608333	1.5245	63.8889	0	0.0077307	5.74953e-11	5.41253e-09	1.22711e-07	36.1111	66.6667	80	chr6p21.1	0001833 // inner cell mass cell proliferation // inferred from electronic annotation /// 0006350 // transcription // inferred from electronic annotation /// 0007275 // multicellular organismal development // inferred from electronic annotation /// 0030154	0005634 // nucleus // inferred from direct assay /// 0005634 // nucleus // inferred from electronic annotation /// 0005669 // transcription factor TFIID complex // inferred from direct assay /// 0005737 // cytoplasm // inferred from electronic annotation	0003677 // DNA binding // inferred from electronic annotation /// 0005515 // protein binding // inferred from physical interaction /// 0016563 // transcription activator activity // inferred from direct assay	---
1556178_x_at	TAF8 RNA polymerase II, TATA box binding protein (TBP)-associated factor, 43kDa	TAF8	191.9	179.65	29.4406	100	116.717	114	16.4645	100	0.588889	1.50409	63.8889	0	0.000301472	3.76485e-14	4.82113e-10	1.27916e-11	36.1111	80	93.3333	chr6p21.1	0001833 // inner cell mass cell proliferation // inferred from electronic annotation /// 0006350 // transcription // inferred from electronic annotation /// 0007275 // multicellular organismal development // inferred from electronic annotation /// 0030154	0005634 // nucleus // inferred from direct assay /// 0005634 // nucleus // inferred from electronic annotation /// 0005669 // transcription factor TFIID complex // inferred from direct assay /// 0005737 // cytoplasm // inferred from electronic annotation	0003677 // DNA binding // inferred from electronic annotation /// 0005515 // protein binding // inferred from physical interaction /// 0016563 // transcription activator activity // inferred from direct assay	---
201867_s_at	transducin (beta)-like 1X-linked	TBL1X	441.25	421.35	130.359	100	600.867	563.85	122.275	100	-0.513889	-1.42789	8.33333	61.1111	0.065377	0.000138518	0.00334147	0.000302773	30.5556	26.6667	46.6667	chrXp22.3	0006350 // transcription // inferred from electronic annotation /// 0006357 // regulation of transcription from RNA polymerase II promoter // inferred from electronic annotation /// 0006508 // proteolysis // inferred from mutant phenotype /// 0007605 // s	0000118 // histone deacetylase complex // inferred from direct assay /// 0005634 // nucleus // inferred from direct assay /// 0005634 // nucleus // inferred from electronic annotation /// 0005667 // transcription factor complex // inferred from electronic	0003677 // DNA binding // inferred from electronic annotation /// 0003682 // chromatin binding // inferred from electronic annotation /// 0003714 // transcription corepressor activity // inferred from direct assay /// 0003714 // transcription corepressor	---
203753_at	transcription factor 4	TCF4	233.667	244.9	57.1525	100	365.1	356.95	120.642	100	-0.558333	-1.47257	0	63.8889	0.0504879	1.48258e-06	1.71108e-06	0.000356475	36.1111	66.6667	26.6667	chr18q21.1	0000122 // negative regulation of transcription from RNA polymerase II promoter // inferred from electronic annotation /// 0006350 // transcription // inferred from electronic annotation /// 0006355 // regulation of transcription, DNA-dependent // inferre	0005634 // nucleus // inferred from direct assay /// 0005634 // nucleus // inferred from electronic annotation /// 0005667 // transcription factor complex // inferred from electronic annotation	0003677 // DNA binding // inferred from direct assay /// 0003677 // DNA binding // inferred from electronic annotation /// 0003700 // sequence-specific DNA binding transcription factor activity // inferred from direct assay /// 0003714 // transcription co	---
212761_at	transcription factor 7-like 2 (T-cell specific, HMG-box)	TCF7L2	1641.93	1578.1	323.486	100	2132.6	2082.3	422.353	100	-0.391667	-1.31191	2.77778	63.8889	0.0624834	2.08475e-06	5.0242e-05	0.000103359	33.3333	40	26.6667	chr10q25.3	0001568 // blood vessel development // inferred from mutant phenotype /// 0006350 // transcription // inferred from electronic annotation /// 0006355 // regulation of transcription, DNA-dependent // inferred from electronic annotation /// 0006357 // regul	0005634 // nucleus // inferred from direct assay /// 0005634 // nucleus // inferred from electronic annotation /// 0005654 // nucleoplasm // inferred from direct assay /// 0005667 // transcription factor complex // inferred from electronic annotation ///	0003677 // DNA binding // inferred from electronic annotation /// 0003700 // sequence-specific DNA binding transcription factor activity // inferred from direct assay /// 0003702 // RNA polymerase II transcription factor activity // inferred from direct a	---
212762_s_at	transcription factor 7-like 2 (T-cell specific, HMG-box)	TCF7L2	312.667	300	76.328	100	494.567	435.3	134.218	100	-0.625	-1.54221	2.77778	66.6667	0.01614	5.80285e-08	4.81591e-07	1.35244e-05	30.5556	60	33.3333	chr10q25.3	0001568 // blood vessel development // inferred from mutant phenotype /// 0006350 // transcription // inferred from electronic annotation /// 0006355 // regulation of transcription, DNA-dependent // inferred from electronic annotation /// 0006357 // regul	0005634 // nucleus // inferred from direct assay /// 0005634 // nucleus // inferred from electronic annotation /// 0005654 // nucleoplasm // inferred from direct assay /// 0005667 // transcription factor complex // inferred from electronic annotation ///	0003677 // DNA binding // inferred from electronic annotation /// 0003700 // sequence-specific DNA binding transcription factor activity // inferred from direct assay /// 0003702 // RNA polymerase II transcription factor activity // inferred from direct a	---
216037_x_at	transcription factor 7-like 2 (T-cell specific, HMG-box)	TCF7L2	365.95	332.2	94.7955	100	538.45	526.95	116.609	100	-0.475	-1.38992	2.77778	61.1111	0.019032	2.88872e-07	4.04591e-06	1.94084e-05	36.1111	66.6667	53.3333	chr10q25.3	0001568 // blood vessel development // inferred from mutant phenotype /// 0006350 // transcription // inferred from electronic annotation /// 0006355 // regulation of transcription, DNA-dependent // inferred from electronic annotation /// 0006357 // regul	0005634 // nucleus // inferred from direct assay /// 0005634 // nucleus // inferred from electronic annotation /// 0005654 // nucleoplasm // inferred from direct assay /// 0005667 // transcription factor complex // inferred from electronic annotation ///	0003677 // DNA binding // inferred from electronic annotation /// 0003700 // sequence-specific DNA binding transcription factor activity // inferred from direct assay /// 0003702 // RNA polymerase II transcription factor activity // inferred from direct a	---
216035_x_at	transcription factor 7-like 2 (T-cell specific, HMG-box)	TCF7L2	472.583	455.15	82.5056	100	717.533	652.45	179.656	100	-0.580556	-1.49542	0	66.6667	0.0121834	9.87191e-10	2.30977e-07	2.58727e-07	33.3333	66.6667	46.6667	chr10q25.3	0001568 // blood vessel development // inferred from mutant phenotype /// 0006350 // transcription // inferred from electronic annotation /// 0006355 // regulation of transcription, DNA-dependent // inferred from electronic annotation /// 0006357 // regul	0005634 // nucleus // inferred from direct assay /// 0005634 // nucleus // inferred from electronic annotation /// 0005654 // nucleoplasm // inferred from direct assay /// 0005667 // transcription factor complex // inferred from electronic annotation ///	0003677 // DNA binding // inferred from electronic annotation /// 0003700 // sequence-specific DNA binding transcription factor activity // inferred from direct assay /// 0003702 // RNA polymerase II transcription factor activity // inferred from direct a	---
216511_s_at	transcription factor 7-like 2 (T-cell specific, HMG-box)	TCF7L2	314.083	294.45	62.8668	100	490.217	462.85	112.808	100	-0.647222	-1.56615	0	72.2222	0.00788032	1.44636e-09	4.16958e-07	5.80985e-07	27.7778	66.6667	53.3333	chr10q25.3	0001568 // blood vessel development // inferred from mutant phenotype /// 0006350 // transcription // inferred from electronic annotation /// 0006355 // regulation of transcription, DNA-dependent // inferred from electronic annotation /// 0006357 // regul	0005634 // nucleus // inferred from direct assay /// 0005634 // nucleus // inferred from electronic annotation /// 0005654 // nucleoplasm // inferred from direct assay /// 0005667 // transcription factor complex // inferred from electronic annotation ///	0003677 // DNA binding // inferred from electronic annotation /// 0003700 // sequence-specific DNA binding transcription factor activity // inferred from direct assay /// 0003702 // RNA polymerase II transcription factor activity // inferred from direct a	---
228285_at	tudor domain containing 9	TDRD9	495.483	401.25	322.898	100	216.317	213.4	74.9157	100	0.941667	1.92075	66.6667	8.33333	0.035935	7.13983e-05	0.00286041	0.00012015	25	20	33.3333	chr14q32.33	0007126 // meiosis // inferred from electronic annotation /// 0007140 // male meiosis // inferred from sequence or structural similarity /// 0007140 // male meiosis // inferred from electronic annotation /// 0007275 // multicellular organismal development	0005634 // nucleus // inferred from sequence or structural similarity /// 0005634 // nucleus // inferred from electronic annotation /// 0005737 // cytoplasm // inferred from electronic annotation /// 0071547 // piP-body // inferred from sequence or struct	0000166 // nucleotide binding // inferred from electronic annotation /// 0003676 // nucleic acid binding // inferred from electronic annotation /// 0004386 // helicase activity // inferred from electronic annotation /// 0005515 // protein binding // infer	---
227636_at	THAP domain containing 5	THAP5	370.367	372.55	117.221	100	255.633	246.8	96.9008	100	0.547222	1.46127	61.1111	5.55556	0.122096	0.000559019	0.00419322	0.0035739	33.3333	40	46.6667	chr7q31.1	0007049 // cell cycle // inferred from electronic annotation /// 0045786 // negative regulation of cell cycle // inferred from mutant phenotype	0005634 // nucleus // inferred from direct assay /// 0005634 // nucleus // inferred from electronic annotation	0002020 // protease binding // inferred from physical interaction /// 0003676 // nucleic acid binding // inferred from electronic annotation /// 0003677 // DNA binding // inferred from electronic annotation /// 0046872 // metal ion binding // inferred fro	---
201109_s_at	thrombospondin 1	THBS1	861.483	320.4	1127.1	100	281.95	153.45	213.911	100	1.18889	2.27977	69.4444	16.6667	0.162636	0.0044628	0.0248226	0.0109207	13.8889	20	33.3333	chr15q15	0000187 // activation of MAPK activity // inferred from mutant phenotype /// 0001666 // response to hypoxia // non-traceable author statement /// 0001937 // negative regulation of endothelial cell proliferation // inferred from direct assay /// 0001937 //	0005576 // extracellular region // not recorded /// 0005576 // extracellular region // inferred from electronic annotation /// 0005577 // fibrinogen complex // inferred from direct assay /// 0005615 // extracellular space // inferred from direct assay ///	0001786 // phosphatidylserine binding // inferred from direct assay /// 0001948 // glycoprotein binding // non-traceable author statement /// 0001968 // fibronectin binding // inferred from direct assay /// 0005178 // integrin binding // inferred from mut	Inflammatory_Response_Pathway // GenMAPP /// TGF_Beta_Signaling_Pathway // GenMAPP
201110_s_at	thrombospondin 1	THBS1	2214.83	1116	2441.15	100	793.933	473.7	557.611	100	1.03889	2.05464	69.4444	19.4444	0.125166	0.00294086	0.0167616	0.00912998	11.1111	13.3333	40	chr15q15	0000187 // activation of MAPK activity // inferred from mutant phenotype /// 0001666 // response to hypoxia // non-traceable author statement /// 0001937 // negative regulation of endothelial cell proliferation // inferred from direct assay /// 0001937 //	0005576 // extracellular region // not recorded /// 0005576 // extracellular region // inferred from electronic annotation /// 0005577 // fibrinogen complex // inferred from direct assay /// 0005615 // extracellular space // inferred from direct assay ///	0001786 // phosphatidylserine binding // inferred from direct assay /// 0001948 // glycoprotein binding // non-traceable author statement /// 0001968 // fibronectin binding // inferred from direct assay /// 0005178 // integrin binding // inferred from mut	Inflammatory_Response_Pathway // GenMAPP /// TGF_Beta_Signaling_Pathway // GenMAPP
235086_at	thrombospondin 1	THBS1	554.867	140.6	884.581	100	162.867	69.95	171.688	100	1.10556	2.15182	63.8889	22.2222	0.26923	0.0243523	0.0783223	0.0415032	13.8889	33.3333	26.6667	chr15q15	0000187 // activation of MAPK activity // inferred from mutant phenotype /// 0001666 // response to hypoxia // non-traceable author statement /// 0001937 // negative regulation of endothelial cell proliferation // inferred from direct assay /// 0001937 //	0005576 // extracellular region // not recorded /// 0005576 // extracellular region // inferred from electronic annotation /// 0005577 // fibrinogen complex // inferred from direct assay /// 0005615 // extracellular space // inferred from direct assay ///	0001786 // phosphatidylserine binding // inferred from direct assay /// 0001948 // glycoprotein binding // non-traceable author statement /// 0001968 // fibronectin binding // inferred from direct assay /// 0005178 // integrin binding // inferred from mut	Inflammatory_Response_Pathway // GenMAPP /// TGF_Beta_Signaling_Pathway // GenMAPP
201108_s_at	thrombospondin 1	THBS1	172.833	101.2	209.785	66.6667	73.6833	41.35	90.6249	66.6667	1.28611	2.4387	61.1111	13.8889	0.179713	0.00581669	0.0152805	0.026493	25	26.6667	40	chr15q15	0000187 // activation of MAPK activity // inferred from mutant phenotype /// 0001666 // response to hypoxia // non-traceable author statement /// 0001937 // negative regulation of endothelial cell proliferation // inferred from direct assay /// 0001937 //	0005576 // extracellular region // not recorded /// 0005576 // extracellular region // inferred from electronic annotation /// 0005577 // fibrinogen complex // inferred from direct assay /// 0005615 // extracellular space // inferred from direct assay ///	0001786 // phosphatidylserine binding // inferred from direct assay /// 0001948 // glycoprotein binding // non-traceable author statement /// 0001968 // fibronectin binding // inferred from direct assay /// 0005178 // integrin binding // inferred from mut	Inflammatory_Response_Pathway // GenMAPP /// TGF_Beta_Signaling_Pathway // GenMAPP
225730_s_at	THUMP domain containing 3	THUMPD3	314.433	302.1	35.0308	100	435.167	429.6	50.2643	100	-0.388889	-1.30938	0	61.1111	0.00116548	4.59118e-10	2.27954e-07	2.5925e-07	38.8889	73.3333	60	chr3p25.3	---	---	0003723 // RNA binding // inferred from electronic annotation /// 0005515 // protein binding // inferred from physical interaction /// 0008168 // methyltransferase activity // inferred from electronic annotation /// 0016740 // transferase activity // infe	---
218615_s_at	transmembrane protein 39A	TMEM39A	94.05	87.6	33.3613	100	59.3667	57.55	10.4877	100	0.861111	1.81644	61.1111	2.77778	0.0351884	3.01218e-09	3.83618e-06	3.48181e-08	36.1111	53.3333	73.3333	chr3q13.33	---	0016020 // membrane // inferred from electronic annotation /// 0016021 // integral to membrane // inferred from electronic annotation	---	---
209754_s_at	thymopoietin	TMPO	107.6	81.65	57.8249	100	57.65	54.6	21.0294	100	1.08889	2.1271	69.4444	0	0.0784385	5.60795e-10	2.10971e-07	2.80816e-07	30.5556	46.6667	60	chr12q22	0045449 // regulation of transcription // inferred from electronic annotation	0000785 // chromatin // inferred from direct assay /// 0005634 // nucleus // inferred from direct assay /// 0005634 // nucleus // inferred from electronic annotation /// 0005634 // nucleus // traceable author statement /// 0005635 // nuclear envelope // i	0003677 // DNA binding // inferred from electronic annotation /// 0005515 // protein binding // inferred from physical interaction /// 0005515 // protein binding // inferred from electronic annotation /// 0005521 // lamin binding // traceable author state	---
207113_s_at	tumor necrosis factor	TNF	46.6	40.75	23.504	66.6667	143.983	154.2	77.9914	83.3333	-1.44167	-2.71634	0	66.6667	0.0285774	1.12268e-06	8.88924e-05	2.18092e-05	33.3333	73.3333	40	chr6p21.3	0000060 // protein import into nucleus, translocation // inferred from direct assay /// 0000122 // negative regulation of transcription from RNA polymerase II promoter // inferred from electronic annotation /// 0000187 // activation of MAPK activity // in	0001891 // phagocytic cup // inferred from sequence or structural similarity /// 0001891 // phagocytic cup // inferred from electronic annotation /// 0005576 // extracellular region // inferred from electronic annotation /// 0005615 // extracellular space	0005125 // cytokine activity // inferred from direct assay /// 0005125 // cytokine activity // inferred from electronic annotation /// 0005164 // tumor necrosis factor receptor binding // inferred from direct assay /// 0005164 // tumor necrosis factor rec	Apoptosis // GenMAPP /// Apoptosis_GenMAPP // GenMAPP /// Apoptosis_KEGG // GenMAPP /// Matrix_Metalloproteinases // GenMAPP /// TGF_Beta_Signaling_Pathway // GenMAPP
206026_s_at	tumor necrosis factor, alpha-induced protein 6	TNFAIP6	590.6	456.05	424.599	100	199.483	180.25	49.6429	100	1.33056	2.515	86.1111	0	0.0170142	1.14378e-08	4.52338e-05	2.1931e-09	13.8889	20	46.6667	chr2q23.3	0006954 // inflammatory response // traceable author statement /// 0007155 // cell adhesion // inferred from electronic annotation /// 0007165 // signal transduction // traceable author statement /// 0007267 // cell-cell signaling // traceable author stat	---	0005488 // binding // inferred from electronic annotation /// 0005540 // hyaluronic acid binding // inferred from electronic annotation /// 0005540 // hyaluronic acid binding // traceable author statement	---
206025_s_at	tumor necrosis factor, alpha-induced protein 6	TNFAIP6	352.917	251.8	281.45	100	114	108.3	16.3427	100	1.26389	2.40142	63.8889	0	0.0284426	8.04197e-07	0.000750588	4.22456e-08	36.1111	20	93.3333	chr2q23.3	0006954 // inflammatory response // traceable author statement /// 0007155 // cell adhesion // inferred from electronic annotation /// 0007165 // signal transduction // traceable author statement /// 0007267 // cell-cell signaling // traceable author stat	---	0005488 // binding // inferred from electronic annotation /// 0005540 // hyaluronic acid binding // inferred from electronic annotation /// 0005540 // hyaluronic acid binding // traceable author statement	---
218876_at	tubulin polymerization-promoting protein family member 3	TPPP3	67.8333	66.9	34.9455	50	117.133	126.65	26.1577	83.3333	-1.01111	-2.01546	0	61.1111	0.0373039	1.0821e-06	0.000123342	4.61294e-06	38.8889	46.6667	60	chr16q22.1	0001578 // microtubule bundle formation // inferred from direct assay	0005737 // cytoplasm // inferred from electronic annotation /// 0005856 // cytoskeleton // inferred from electronic annotation /// 0005874 // microtubule // inferred from electronic annotation	0005509 // calcium ion binding // inferred from electronic annotation /// 0015631 // tubulin binding // inferred from direct assay	---
204140_at	tyrosylprotein sulfotransferase 1	TPST1	154.533	105.2	122.936	66.6667	30.0167	19.9	24.5766	16.6667	1.89167	3.71064	69.4444	5.55556	0.0974474	0.000655985	0.00805966	0.00179005	25	20	46.6667	chr7q11.21	0006478 // peptidyl-tyrosine sulfation // traceable author statement /// 0006954 // inflammatory response // traceable author statement	0000139 // Golgi membrane // inferred from electronic annotation /// 0005624 // membrane fraction // traceable author statement /// 0005794 // Golgi apparatus // inferred from electronic annotation /// 0016020 // membrane // inferred from electronic annot	0008146 // sulfotransferase activity // inferred from electronic annotation /// 0008476 // protein-tyrosine sulfotransferase activity // inferred from electronic annotation /// 0008476 // protein-tyrosine sulfotransferase activity // traceable author stat	---
201090_x_at	tubulin, alpha 1b	TUBA1B	3314.12	3337.85	683.916	100	4339.37	4370.45	570.188	100	-0.444444	-1.36079	0	66.6667	0.0342336	1.33154e-07	2.94056e-05	9.39409e-07	33.3333	46.6667	53.3333	chr12q13.12	0007017 // microtubule-based process // inferred from electronic annotation /// 0007018 // microtubule-based movement // inferred from electronic annotation /// 0051258 // protein polymerization // inferred from electronic annotation	0005874 // microtubule // inferred from electronic annotation /// 0043234 // protein complex // inferred from electronic annotation	0000166 // nucleotide binding // inferred from electronic annotation /// 0003924 // GTPase activity // inferred from electronic annotation /// 0005198 // structural molecule activity // inferred from electronic annotation /// 0005515 // protein binding //	---
211058_x_at	tubulin, alpha 1b	TUBA1B	4030.53	4063.7	709.211	100	5335.55	5339.9	573.099	100	-0.411111	-1.32971	0	63.8889	0.0135668	1.23484e-08	4.47715e-06	3.4326e-07	36.1111	46.6667	60	chr12q13.12	0007017 // microtubule-based process // inferred from electronic annotation /// 0007018 // microtubule-based movement // inferred from electronic annotation /// 0051258 // protein polymerization // inferred from electronic annotation	0005874 // microtubule // inferred from electronic annotation /// 0043234 // protein complex // inferred from electronic annotation	0000166 // nucleotide binding // inferred from electronic annotation /// 0003924 // GTPase activity // inferred from electronic annotation /// 0005198 // structural molecule activity // inferred from electronic annotation /// 0005515 // protein binding //	---
211072_x_at	tubulin, alpha 1b	TUBA1B	3812.22	3805.2	715.249	100	4953.02	4862.45	660.889	100	-0.380556	-1.30184	0	66.6667	0.0279983	2.08083e-08	8.43323e-06	3.28906e-07	33.3333	46.6667	60	chr12q13.12	0007017 // microtubule-based process // inferred from electronic annotation /// 0007018 // microtubule-based movement // inferred from electronic annotation /// 0051258 // protein polymerization // inferred from electronic annotation	0005874 // microtubule // inferred from electronic annotation /// 0043234 // protein complex // inferred from electronic annotation	0000166 // nucleotide binding // inferred from electronic annotation /// 0003924 // GTPase activity // inferred from electronic annotation /// 0005198 // structural molecule activity // inferred from electronic annotation /// 0005515 // protein binding //	---
212639_x_at	tubulin, alpha 1b	TUBA1B	4391.25	4518.35	643.438	100	5878.25	5816.2	714.455	100	-0.438889	-1.35556	0	72.2222	0.00708856	5.6943e-08	1.9155e-05	1.46281e-06	27.7778	33.3333	40	chr12q13.12	0007017 // microtubule-based process // inferred from electronic annotation /// 0007018 // microtubule-based movement // inferred from electronic annotation /// 0051258 // protein polymerization // inferred from electronic annotation	0005874 // microtubule // inferred from electronic annotation /// 0043234 // protein complex // inferred from electronic annotation	0000166 // nucleotide binding // inferred from electronic annotation /// 0003924 // GTPase activity // inferred from electronic annotation /// 0005198 // structural molecule activity // inferred from electronic annotation /// 0005515 // protein binding //	---
213646_x_at	tubulin, alpha 1b	TUBA1B	3606.4	3601.55	655.949	100	4692.05	4730.45	695.135	100	-0.45	-1.36604	0	66.6667	0.0305629	1.42769e-07	5.39701e-05	5.46082e-07	33.3333	33.3333	46.6667	chr12q13.12	0007017 // microtubule-based process // inferred from electronic annotation /// 0007018 // microtubule-based movement // inferred from electronic annotation /// 0051258 // protein polymerization // inferred from electronic annotation	0005874 // microtubule // inferred from electronic annotation /// 0043234 // protein complex // inferred from electronic annotation	0000166 // nucleotide binding // inferred from electronic annotation /// 0003924 // GTPase activity // inferred from electronic annotation /// 0005198 // structural molecule activity // inferred from electronic annotation /// 0005515 // protein binding //	---
209251_x_at	tubulin, alpha 1c	TUBA1C	2523.77	2521.55	448.761	100	3446.62	3459	525.106	100	-0.455556	-1.37131	0	63.8889	0.0139588	1.29101e-07	4.45679e-05	7.03915e-07	36.1111	33.3333	53.3333	chr12q13.12	0007017 // microtubule-based process // inferred from electronic annotation /// 0007018 // microtubule-based movement // inferred from electronic annotation /// 0051258 // protein polymerization // inferred from electronic annotation	0005874 // microtubule // inferred from electronic annotation /// 0043234 // protein complex // inferred from electronic annotation	0000166 // nucleotide binding // inferred from electronic annotation /// 0003924 // GTPase activity // inferred from electronic annotation /// 0005198 // structural molecule activity // inferred from electronic annotation /// 0005515 // protein binding //	---
211750_x_at	tubulin, alpha 1c	TUBA1C	2522.55	2467.65	578.116	100	3591.68	3562.1	640.036	100	-0.444444	-1.36079	0	63.8889	0.0210841	1.31918e-07	1.57639e-05	2.62167e-06	36.1111	33.3333	46.6667	chr12q13.12	0007017 // microtubule-based process // inferred from electronic annotation /// 0007018 // microtubule-based movement // inferred from electronic annotation /// 0051258 // protein polymerization // inferred from electronic annotation	0005874 // microtubule // inferred from electronic annotation /// 0043234 // protein complex // inferred from electronic annotation	0000166 // nucleotide binding // inferred from electronic annotation /// 0003924 // GTPase activity // inferred from electronic annotation /// 0005198 // structural molecule activity // inferred from electronic annotation /// 0005515 // protein binding //	---
223288_at	ubiquitin specific peptidase 38	USP38	591.717	523.05	139.052	100	436.95	411.6	128.08	100	0.438889	1.35556	61.1111	11.1111	0.0715073	0.000223087	0.00133204	0.00306541	27.7778	46.6667	40	---	0006511 // ubiquitin-dependent protein catabolic process // inferred from electronic annotation	---	0004221 // ubiquitin thiolesterase activity // inferred from electronic annotation /// 0008233 // peptidase activity // inferred from electronic annotation /// 0008234 // cysteine-type peptidase activity // inferred from electronic annotation /// 0016787	---
228492_at	ubiquitin specific peptidase 9, Y-linked	USP9Y	11.8667	5.25	17.0548	16.6667	65.6167	79.2	47.2099	66.6667	-2.46389	-5.51702	5.55556	66.6667	0.133089	0.000838078	0.0017298	0.0112171	27.7778	66.6667	26.6667	chrYq11.2	0006511 // ubiquitin-dependent protein catabolic process // inferred from electronic annotation /// 0007179 // transforming growth factor beta receptor signaling pathway // inferred from sequence or structural similarity /// 0007283 // spermatogenesis //	0005737 // cytoplasm // inferred from sequence or structural similarity /// 0005737 // cytoplasm // inferred from electronic annotation	0004221 // ubiquitin thiolesterase activity // inferred from electronic annotation /// 0004843 // ubiquitin-specific protease activity // traceable author statement /// 0005488 // binding // inferred from electronic annotation /// 0008233 // peptidase act	---
211760_s_at	vesicle-associated membrane protein 4	VAMP4	305.717	311.65	80.2747	100	208.65	189.7	53.9773	100	0.519444	1.4334	63.8889	2.77778	0.0517847	1.97877e-05	0.000106155	0.000689704	33.3333	46.6667	40	chr1q24-q25	0016192 // vesicle-mediated transport // inferred from electronic annotation	0000139 // Golgi membrane // traceable author statement /// 0005764 // lysosome // traceable author statement /// 0005768 // endosome // traceable author statement /// 0005794 // Golgi apparatus // inferred from electronic annotation /// 0016020 // membra	---	---
203940_s_at	vasohibin 1	VASH1	59.1833	49.15	32.7225	83.3333	103.767	82.85	51.5914	100	-1.03889	-2.05464	0	66.6667	0.12936	4.07181e-05	0.00086486	0.000415858	33.3333	73.3333	26.6667	chr14q24.3	0001525 // angiogenesis // inferred from electronic annotation /// 0001937 // negative regulation of endothelial cell proliferation // inferred from direct assay /// 0007049 // cell cycle // inferred from electronic annotation /// 0007050 // cell cycle ar	0005576 // extracellular region // inferred from electronic annotation /// 0005615 // extracellular space // inferred from direct assay /// 0005737 // cytoplasm // inferred from electronic annotation /// 0005783 // endoplasmic reticulum // inferred from d	---	---
205844_at	vanin 1	VNN1	1816.9	1821.9	672.802	100	1035.1	1000	154.368	100	0.727778	1.65609	77.7778	2.77778	0.0278221	3.53334e-07	0.000257792	1.06397e-07	19.4444	20	60	chr6q23-q24	0002526 // acute inflammatory response // inferred from sequence or structural similarity /// 0002526 // acute inflammatory response // inferred from electronic annotation /// 0002544 // chronic inflammatory response // inferred from sequence or structura	0005886 // plasma membrane // inferred from electronic annotation /// 0016020 // membrane // inferred from electronic annotation /// 0016021 // integral to membrane // traceable author statement /// 0031225 // anchored to membrane // inferred from electro	0016787 // hydrolase activity // inferred from electronic annotation /// 0016810 // hydrolase activity, acting on carbon-nitrogen (but not peptide) bonds // inferred from electronic annotation /// 0016811 // hydrolase activity, acting on carbon-nitrogen (	---
1558549_s_at	vanin 1	VNN1	308.067	304.45	107.107	100	156.333	155.1	29.2023	100	0.986111	1.98084	75	0	0.0133099	2.1829e-10	2.50881e-06	7.21919e-10	25	40	80	chr6q23-q24	0002526 // acute inflammatory response // inferred from sequence or structural similarity /// 0002526 // acute inflammatory response // inferred from electronic annotation /// 0002544 // chronic inflammatory response // inferred from sequence or structura	0005886 // plasma membrane // inferred from electronic annotation /// 0016020 // membrane // inferred from electronic annotation /// 0016021 // integral to membrane // traceable author statement /// 0031225 // anchored to membrane // inferred from electro	0016787 // hydrolase activity // inferred from electronic annotation /// 0016810 // hydrolase activity, acting on carbon-nitrogen (but not peptide) bonds // inferred from electronic annotation /// 0016811 // hydrolase activity, acting on carbon-nitrogen (	---
235818_at	V-set and transmembrane domain containing 1	VSTM1	406.133	398.4	97.6364	100	199.75	186.25	126.738	83.3333	1.48889	2.80673	72.2222	5.55556	0.0666492	2.15287e-05	2.9873e-06	0.00286685	22.2222	40	13.3333	chr19q13.42	---	0016020 // membrane // inferred from electronic annotation /// 0016021 // integral to membrane // inferred from electronic annotation	---	---
224563_at	WAS protein family, member 2	WASF2	1347.18	1350.75	383.816	100	1830.08	1753.15	299.906	100	-0.505556	-1.41967	2.77778	61.1111	0.0618852	3.20932e-05	0.00232493	4.37442e-05	36.1111	26.6667	53.3333	chr1p36.11	0001525 // angiogenesis // inferred from electronic annotation /// 0001667 // ameboidal cell migration // inferred from electronic annotation /// 0006897 // endocytosis // inferred from electronic annotation /// 0006928 // cellular component movement // i	0001726 // ruffle // inferred from electronic annotation /// 0005622 // intracellular // inferred from direct assay /// 0005737 // cytoplasm // inferred from electronic annotation /// 0005769 // early endosome // inferred from electronic annotation /// 00	0003779 // actin binding // inferred from electronic annotation /// 0003779 // actin binding // traceable author statement /// 0004969 // histamine receptor activity // inferred from electronic annotation /// 0005515 // protein binding // inferred from ph	---
201294_s_at	WD repeat and SOCS box-containing 1	WSB1	340.283	271	205.802	100	113.317	106.9	33.3938	100	1.41111	2.65942	86.1111	0	0.0160844	2.96966e-09	1.05107e-05	2.47986e-09	13.8889	13.3333	60	chr17q11.1	---	0005622 // intracellular // inferred from direct assay	0005515 // protein binding // inferred from physical interaction /// 0016301 // kinase activity // inferred from electronic annotation	---
214218_s_at	X (inactive)-specific transcript (non-protein coding)	XIST	964.017	1071.2	525.688	83.3333	173.967	17.15	231.812	50	3.23889	9.44067	80.5556	5.55556	0.039323	2.82794e-05	0.000369459	0.00054976	13.8889	33.3333	40	chrXq13.2	---	---	---	---
221728_x_at	X (inactive)-specific transcript (non-protein coding)	XIST	1318.17	1451.9	671.178	83.3333	254.617	18.1	357.209	33.3333	4.13889	17.6169	80.5556	5.55556	0.0372358	2.79128e-06	2.40126e-05	0.000222187	13.8889	33.3333	40	chrXq13.2	---	---	---	---
224588_at	X (inactive)-specific transcript (non-protein coding)	XIST	4185.85	4527.1	2245.75	83.3333	972.283	3.1	1390.41	33.3333	6.16944	71.976	80.5556	5.55556	0.0576323	3.8558e-05	0.000170062	0.0012194	13.8889	13.3333	40	chrXq13.2	---	---	---	---
227671_at	X (inactive)-specific transcript (non-protein coding)	XIST	1688.12	1721.1	962.564	83.3333	332.383	14.3	464.338	33.3333	4.45833	21.9833	80.5556	5.55556	0.0432826	1.43552e-05	8.03672e-05	0.000690376	13.8889	13.3333	40	chrXq13.2	---	---	---	---
224589_at	X (inactive)-specific transcript (non-protein coding)	XIST	116.333	103.45	70.1281	83.3333	23.9167	3.15	30.8823	16.6667	3.15	8.87656	77.7778	2.77778	0.0323207	2.4766e-06	2.16679e-05	0.000204644	19.4444	26.6667	80	chrXq13.2	---	---	---	---
224590_at	X (inactive)-specific transcript (non-protein coding)	XIST	1160.57	1448	554.428	83.3333	283.233	5.05	404.942	33.3333	4.97778	31.5109	77.7778	5.55556	0.0638102	8.36743e-05	0.000288693	0.00224529	16.6667	40	33.3333	chrXq13.2	---	---	---	---
227678_at	XRCC6 binding protein 1	XRCC6BP1	234.5	239.7	84.9021	100	321.6	341.7	82.3673	100	-0.6	-1.51572	13.8889	61.1111	0.156512	0.000272876	0.00492806	0.00076434	25	33.3333	26.6667	chr12q14.1	0006303 // double-strand break repair via nonhomologous end joining // traceable author statement /// 0006508 // proteolysis // inferred from electronic annotation	0005958 // DNA-dependent protein kinase-DNA ligase 4 complex // non-traceable author statement	0004677 // DNA-dependent protein kinase activity // traceable author statement /// 0008233 // peptidase activity // inferred from electronic annotation /// 0008237 // metallopeptidase activity // inferred from electronic annotation /// 0008270 // zinc ion	---
233878_s_at	5'-3' exoribonuclease 2	XRN2	288	286	98.6883	100	183	157.65	62.3708	100	0.583333	1.49831	61.1111	5.55556	0.079349	0.000564252	0.00341491	0.00374379	33.3333	33.3333	26.6667	chr20p11.2-p11.1	0000738 // DNA catabolic process, exonucleolytic // inferred from direct assay /// 0006139 // nucleobase, nucleoside, nucleotide and nucleic acid metabolic process // inferred from electronic annotation /// 0006350 // transcription // inferred from electr	0005622 // intracellular // inferred from electronic annotation /// 0005634 // nucleus // inferred from electronic annotation /// 0005634 // nucleus // traceable author statement /// 0005730 // nucleolus // inferred from direct assay /// 0005730 // nucleo	0003676 // nucleic acid binding // inferred from electronic annotation /// 0004518 // nuclease activity // traceable author statement /// 0004518 // nuclease activity // inferred from electronic annotation /// 0004527 // exonuclease activity // inferred f	mRNA_processing_Reactome // GenMAPP
220933_s_at	zinc finger, CCHC domain containing 6	ZCCHC6	1185.17	1151.35	394.207	100	800.533	821.85	98.5073	100	0.486111	1.40066	63.8889	2.77778	0.060958	1.46693e-05	0.00187542	6.09077e-06	33.3333	26.6667	73.3333	chr9q21	0031123 // RNA 3'-end processing // inferred from direct assay /// 0071044 // histone mRNA catabolic process // inferred from mutant phenotype	---	0003676 // nucleic acid binding // inferred from electronic annotation /// 0008270 // zinc ion binding // inferred from electronic annotation /// 0016740 // transferase activity // inferred from electronic annotation /// 0016779 // nucleotidyltransferase	---
228637_at	zinc finger, DHHC-type containing 1	ZDHHC1	79.2833	74.9	21.9643	0	152.883	156.45	23.5836	83.3333	-0.969444	-1.95809	0	61.1111	0.000851523	2.13945e-14	3.8645e-09	9.35641e-13	38.8889	80	73.3333	chr16q22.1	0018345 // protein palmitoylation // inferred from electronic annotation	0016020 // membrane // inferred from electronic annotation /// 0016021 // integral to membrane // inferred from electronic annotation	0003677 // DNA binding // non-traceable author statement /// 0008270 // zinc ion binding // inferred from electronic annotation /// 0008415 // acyltransferase activity // inferred from electronic annotation /// 0016409 // palmitoyltransferase activity //	---
217649_at	zinc finger, AN1-type domain 5	ZFAND5	368.767	225.8	374.048	100	186.283	188.55	88.6245	100	0.872222	1.83048	61.1111	2.77778	0.277504	0.00118606	0.0120285	0.00322074	36.1111	40	26.6667	chr9q13-q21	0001701 // in utero embryonic development // inferred from electronic annotation /// 0001944 // vasculature development // inferred from electronic annotation /// 0003016 // respiratory system process // inferred from electronic annotation /// 0010761 //	---	0003677 // DNA binding // inferred from electronic annotation /// 0008270 // zinc ion binding // inferred from electronic annotation /// 0046872 // metal ion binding // inferred from electronic annotation	---
211965_at	zinc finger protein 36, C3H type-like 1	ZFP36L1	138.3	142.7	48.8249	100	211.383	201.4	55.4482	100	-0.802778	-1.74446	0	72.2222	0.0490984	1.18368e-09	3.12961e-06	6.28076e-09	27.7778	60	80	chr14q22-q24	0000288 // nuclear-transcribed mRNA catabolic process, deadenylation-dependent decay // inferred from electronic annotation /// 0001570 // vasculogenesis // inferred from electronic annotation /// 0006402 // mRNA catabolic process // inferred from electro	0005634 // nucleus // inferred from electronic annotation /// 0005737 // cytoplasm // inferred from electronic annotation /// 0005829 // cytosol // inferred from electronic annotation	0003676 // nucleic acid binding // inferred from electronic annotation /// 0003677 // DNA binding // inferred from electronic annotation /// 0003700 // sequence-specific DNA binding transcription factor activity // non-traceable author statement /// 00037	---
222760_at	zinc finger protein 703	ZNF703	132.333	138.65	25.1991	83.3333	220.933	227.2	40.9978	100	-0.766667	-1.70133	2.77778	66.6667	0.00354706	5.66297e-09	2.89236e-06	1.71777e-07	30.5556	26.6667	60	chr8p11.23	0006350 // transcription // inferred from electronic annotation /// 0045449 // regulation of transcription // inferred from electronic annotation	0005622 // intracellular // inferred from electronic annotation /// 0005634 // nucleus // inferred from electronic annotation	0003676 // nucleic acid binding // inferred from electronic annotation /// 0008270 // zinc ion binding // inferred from electronic annotation /// 0046872 // metal ion binding // inferred from electronic annotation	---
EG: Experiment group of chips (6 RA chips: blood monocytes), BG: Baseline group of chips (6 OA chips: blood monocytes), FC: Fold Change, SLR: Signal Log Ratio (i.e. Log2 of FC)
