# Supplementary material
Source: HighWire-hosted journal article supplement (https://ard.bmj.com/content/77/2/300)
Supplement: inline-supplementary-material-7 [file inline-supplementary-material-7.xls]

## Sheet: Supp Table 4_Biological process
		Supplementary Table 4. Biological processes determined by Gene ontology in comparisons between RA and OA monocytes in perihperal blood (PB) and bone marrow (BM). In total, top 15 Biological processe were selected based on the corrected Hypergeometric (Hyp p-values) determined by GeneCodis algorithm
		Biological processess identified in comparison between RA and OA monocytes in bone marrow
		Biological process (BP) determined by particulat GO number	NG	TNG	NGR	TNGR	Hyp	Hyp_c	Genes
		cellular component movement (BP); GO:0006928	7	136	95	34208	1.1096e-07	7.36776e-05	Up-regulated: ACTR2, ARF6, ARPC5, FPR2, IL8
									Down-regulated: ANXA1, VNN1
		anti-apoptosis (BP); GO:0006916	8	136	200	34208	1.47324e-06	0.000489115	Up-regulated: CLU, FAS, IL10, SOCS3, YWHAZ
									Down-regulated: ANXA1, NOTCH2NL, VNN1
		blood coagulation (BP); GO:0007596	11	136	457	34208	2.33785e-06	0.000517445	Up-regulated: CLU, HBB, ITGA4, ITGA6, ITGB1, RHOA, THBD, WDR1, YWHAZ
									Down-regulated: AKAP10, CD36
		hemopoiesis (BP); GO:0030097	5	136	64	34208	5.82574e-06	0.000967073	Up-regulated: FLT3, IL10, PICALM, ZBTB16
									Down-regulated: NOTCH2NL
		positive regulation of apoptotic process (BP); GO:0043065	7	136	178	34208	7.61595e-06	0.0010114	Up-regulated: CLU, DUSP1, FAS, ITGA6, ITGB1, ZBTB16
									Down-regulated: ANXA1
		inflammatory response (BP); GO:0006954	8	136	259	34208	9.89827e-06	0.00109541	Up-regulated: FPR2, IL10, IL8, TNFAIP6, TPST1
									Down-regulated: ANXA1, C3AR1, VNN1
		response to glucocorticoid stimulus (BP); GO:0051384	5	136	84	34208	2.21344e-05	0.00209961	Up-regulated: DUSP1, FAS, IL10, SOCS3
									Down-regulated: ANXA1
		response to drug (BP); GO:0042493	8	136	301	34208	2.91005e-05	0.00241534	Up-regulated: FAS, IL10, ITGB1, SOCS3, SRP72, YWHAZ
									Down-regulated: ANXA1, XPO1
		protein transport (BP); GO:0015031	9	136	413	34208	4.3373e-05	0.00319997	Up-regulated: ARF1, ARF6, EIF5A, GDI2, RAB1A, RAB8B, VAMP3
									Down-regulated: ATG16L2, LYST
		negative regulation of cell proliferation (BP); GO:0008285	8	136	341	34208	6.99341e-05	0.00464362	Up-regulated: ALOX15B, ASPH, FLT3, IL8, ITGB1, OSM, ZBTB16
									Down-regulated: NOTCH2NL
		cell adhesion (BP); GO:0007155	10	136	556	34208	8.10065e-05	0.00488985	Up-regulated: ALCAM, ARF6, FPR2, ITGA4, ITGA6, ITGB1, PKP4, RHOA, TNFAIP6
									Down-regulated: CD36
		positive regulation of MAPK cascade (BP); GO:0043410	4	136	61	34208	0.000104623	0.00578915	Up-regulated: FLT3, ITGB1, OSM
									Down-regulated: CD36
		integrin-mediated signaling pathway (BP); GO:0007229	4	136	70	34208	0.00017881	0.00913305	Up-regulated: ADAM10, ITGA4, ITGA6, ITGB1
									Down-regulated: /
		negative regulation of receptor-mediated endocytosis (BP); GO:0048261	2	136	6	34208	0.000232906	0.0096656	Up-regulated: ARF6, PICALM
									Down-regulated: /
		response to molecule of bacterial origin (BP); GO:0002237	2	136	6	34208	0.000232906	0.0096656	Up-regulated: IL10, IL8
									Down-regulated:
		Biological processess identified in comparison between RA and OA monocytes in peripheral blood
		Biological process (BP) determined by particulat GO number	NG	TNG	NGR	TNGR	Hyp	Hyp_c	Genes
		inflammatory response (BP); GO:0006954	19	272	259	34208	3.7048e-13	4.16419e-10	Up-regulated: CCR2, CD163, FPR2, LTB4R, NLRC4, PXK, SMAD1, THBS1, TNFAIP6, TPST1, VNN1
									Down-regulated: CAMK1D, CCL2, CHST2, CSF1R, ITGAL, MIF, RIPK2, TNF
		positive regulation of transcription from RNA polymerase II promoter (BP); GO:0045944	21	272	578	34208	9.85423e-09	5.53808e-06	Up-regulated: ACVR1B, HMGB2, JUN, MYC, RUNX1, SMAD1
									Down-regulated: BCL11A, BCL3, CIITA, CSRNP1, EGR1, EGR2 ,FOXO1, IKZF1, IRF1, MORF4L2, NR4A2, TBL1X, TCF4, TCF7L2, TNF
		negative regulation of transcription from RNA polymerase II promoter (BP); GO:0000122	16	272	416	34208	2.77179e-07	6.23099e-05	Up-regulated: MYC ,PER2, SAP30
									Down-regulated: BHLHE40, CDKN1C, CIITA, EGR1, FOSB, IKZF1, MECP2, RUNX3, SIK1, TBL1X, TCF4, TCF7L2, TNF
		positive regulation of transcription, DNA-dependent (BP); GO:0045893	17	272	468	34208	2.61525e-07	7.34886e-05	Up-regulated: HMGB2, JUN, MYC, PICALM, RUNX1, TAF8
									Down-regulated: BCL3, CDKN1C, CIITA, EGR1, EGR2, FOXO1, HIVEP3, SPEN, TBL1X, TCF4, TNF
		cytokine-mediated signaling pathway (BP); GO:0019221	11	272	181	34208	2.50069e-07	9.36925e-05	Up-regulated: CCR2, IFNGR1, IRAK3, JAK1
									Down-regulated: CCL2, CD44, CIITA, CSF1R, EGR1, IRF1, KRAS
		anti-apoptosis (BP); GO:0006916	11	272	200	34208	6.76542e-07	0.000126739	Up-regulated: BAG4, CLEC5A, NAIP, SERPINB2, THBS1, VNN1
									Down-regulated: CCL2, FOXO1, RIPK2, TCF7L2, TNF
		T cell differentiation (BP); GO:0030217	5	272	23	34208	9.16856e-07	0.000147221	Up-regulated: GIMAP1, GIMAP5
									Down-regulated: BCL11A, EGR1, IKZF1
		response to organic cyclic compound (BP); GO:0014070	8	272	112	34208	3.35696e-06	0.000471653	Up-regulated: ACSL1, ACSL3, CDKN2B, JUN, OCLN, STS
									Down-regulated: BTG2, CD83
		regulation of cyclin-dependent protein kinase activity (BP), GO:0000079	6	272	55	34208	5.00074e-06	0.000624536	Up-regulated: CDK5R1, CDKN2B, GADD45A, PTEN
									Down-regulated: C13orf15, CDKN1C
		cellular response to calcium ion (BP); GO:0071277	4	272	17	34208	8.57723e-06	0.000876437	Up-regulated: ALOX5AP, CLIC4, JUN
									Down-regulated: FOSB
		innate immune response (BP); GO:0045087	12	272	309	34208	7.91812e-06	0.000889997	Up-regulated: CLEC4D, CLEC5A, JUN, MAP2K6, NLRC4, VNN1
									Down-regulated: CLEC10A, CSF1R, MAPKAPK3, MIF, PCBP2, RIPK2
		cell cycle arrest (BP); GO:0007050	8	272	129	34208	9.58073e-06	0.000897395	Up-regulated: CDKN2B, GADD45A, MAP2K6, MYC, THBS1
									Down-regulated: CDKN1C, GAS2L1, TCF7L2
		negative regulation of apoptotic process (BP); GO:0043066	11	272	272	34208	1.29931e-05	0.000912763	Up-regulated: GIMAP5, MYC, PTEN, THBS1
									Down-regulated: BCL3, BTG2, CD44, EGR3, MIF, SH3RF1, TNF
		hemopoiesis (BP); GO:0030097	6	272	64	34208	1.21822e-05	0.000912853	Up-regulated: PICALM, RUNX1
									Down-regulated: BCL11A, CSF1R, IKZF1, ROGDI
		response to hypoxia (BP); GO:0001666	9	272	175	34208	1.21451e-05	0.000975076	Up-regulated: ADM, THBS1
									Down-regulated: ATP1B1, CCL2, NR4A2, PAM, PDLIM1, RHOC, TNF
		Biological processess identified as common for comparison between RA and OA monocytes in bone marrow and peripheral blood
		Biological process (BP) determined by particulat GO number	NG	TNG	NGR	TNGR	Hyp	Hyp_c	Genes
		inflammatory response (BP); GO:0006954	4	21	259	34208	1.73635e-05	0.00111126	Up-regulated: FPR2, TNFAIP6, TPST1, VNN1 (up-regulated in blood Monocytes)
									Down-regulated: VNN1 (down-regulated in bone marrow monocytes)
		NGR = Number of annotated genes in the reference list;
		TNGR = Total number of genes in the reference list;
		NG = Number of annotated genes in the input list;
		TNG = Total number of genes in the input list;
		Hyp = Hypergeometric pValue; Hyp* = Corrected hypergeometric pValue
